# Supplementary material for: Blood eosinophils, fractional exhaled nitric oxide and the risk of asthma attacks in randomised controlled trials: protocol for a systemic review and control arm patient-level meta-analysis for clinical prediction modelling
Source: PubMed Central journal article supplement — BMJ Open. 2022 Apr 1;12(4):e058215. doi: 10.1136/bmjopen-2021-058215 (PMC8977743; doi:10.1136/bmjopen-2021-058215), 2022-04-01
Supplement: bmjopen-2021-058215.draft_revisions.pdf [file bmjopen-2021-058215.draft_revisions.pdf]

# BMJ Open

BMJ Open is committed to open peer review. As part of this commitment we make the peer review history of every article we publish publicly available.

When an article is published we post the peer reviewers' comments and the authors' responses online. We also post the versions of the paper that were used during peer review. These are the versions that the peer review comments apply to.

The versions of the paper that follow are the versions that were submitted during the peer review process. They are not the versions of record or the final published versions. They should not be cited or distributed as the published version of this manuscript.

BMJ Open is an open access journal and the full, final, typeset and author-corrected version of record of the manuscript is available on our site with no access controls, subscription charges or pay-per-view fees (<http://bmjopen.bmj.com>).

If you have any questions on BMJ Open's open peer review process please email [info.bmjopen@bmj.com](mailto:info.bmjopen@bmj.com)

# BMJ Open

**Blood eosinophils, fractional exhaled nitric oxide, and the risk of asthma attacks in randomised controlled trials: protocol for a systemic review and control arm patient-level meta-analysis for clinical prediction modelling**

|                               |                                                                                                                                                                                                                                                                                                                                                          |
|-------------------------------|----------------------------------------------------------------------------------------------------------------------------------------------------------------------------------------------------------------------------------------------------------------------------------------------------------------------------------------------------------|
| Journal:                      | <i>BMJ Open</i>                                                                                                                                                                                                                                                                                                                                          |
| Manuscript ID                 | bmjopen-2021-058215                                                                                                                                                                                                                                                                                                                                      |
| Article Type:                 | Protocol                                                                                                                                                                                                                                                                                                                                                 |
| Date Submitted by the Author: | 11-Oct-2021                                                                                                                                                                                                                                                                                                                                              |
| Complete List of Authors:     | Couillard, Simon; University of Oxford, Oxford Respiratory NIHR BRC, Nuffield Department of Medicine<br>Steyerberg, Ewout; Leiden University Medical Center, Biomedical Data Sciences<br>Beasley, Richard; Medical Research Institute of New Zealand<br>Pavord, Ian ; University of Oxford, Oxford Respiratory NIHR BRC, Nuffield Department of Medicine |
| Keywords:                     | Asthma < THORACIC MEDICINE, Immunology < THORACIC MEDICINE, Epidemiology < THORACIC MEDICINE, Thoracic medicine < INTERNAL MEDICINE, PREVENTIVE MEDICINE                                                                                                                                                                                                 |
|                               |                                                                                                                                                                                                                                                                                                                                                          |

SCHOLARONE™  
Manuscripts

**TITLE:** Blood eosinophils, fractional exhaled nitric oxide, and the risk of asthma attacks in randomised controlled trials: protocol for a systemic review and control arm patient-level meta-analysis for clinical prediction modelling

**AUTHORS:** Simon Couillard<sup>1-3</sup>, MD FRCPC ORCID 0000-0002-4057-6886

Ewout Steyerberg<sup>3</sup>, PhD ORCID 0000-0002-7787-0122

Richard Beasley<sup>4</sup> MBChB D.Sc ORCID 0000-0003-0337-406X

Ian D Pavord<sup>1</sup> DM FRCP FERS FMedSci ORCID 0000-0002-4288-5973

**From:** <sup>1</sup>Respiratory Medicine Unit and Oxford Respiratory NIHR BRC, Nuffield Department of Medicine, University of Oxford, Old Road Campus, Oxford OX3 7FZ. <sup>2</sup>Faculté de Médecine et des Sciences de la Santé, Université de Sherbrooke, 3001 12<sup>e</sup> Avenue Nord, Sherbrooke (Québec), QC J1H 5N4, Canada and <sup>3</sup>Department of Biomedical Data Sciences, Leiden University Medical Center, Leiden, The Netherlands <sup>4</sup>Medical Research Institute of New Zealand, Private Bag 7902, Newtown, Wellington, New Zealand.

**Address for correspondence:** Dr Simon Couillard, Respiratory Medicine Unit and Oxford Respiratory NIHR BRC, Nuffield Department of Medicine, University of Oxford, Oxford OX3 7FZ, United-Kingdom. E-mail: [s.couillard@usherbrooke.ca](mailto:s.couillard@usherbrooke.ca)

**Registration:** In accordance with reporting guidelines, the systematic review protocol was registered with the International Prospective Register of Systematic Reviews (PROSPERO) on 23 March 2021 and was last updated on 23 June 2021 (registration number CRD42021245337)

**Word count:** 2781/4000

1  
2  
3 **Financial/nonfinancial disclosures: The authors declare the following:**  
4  
5

- 6
- 7 • Funding: This work was supported by the NIHR Oxford BRC. The funders had no role in  
8 the conduct of the study nor the writing of the manuscript. The views expressed are those  
9 of the authors and not necessarily those of the NHS, the NIHR or the Department of Health.  
10
  - 11 • For the purpose of Open Access, the author has applied a CC BY public copyright license  
12 to any Author Accepted Manuscript version arising from this submission.  
13
  - 14 • Ethics: the protocol has been reviewed by the Oxford Tropical Research Ethics Committee  
15 and found to comprise fully anonymised data not requiring further ethical approbation.  
16  
17  
18  
19  
20  
21  
22

23 **Patient and public involvement:** No patient involved.  
24

25  
26 **Author contributions:** SC drafted the protocol and participated in the systematic review literature  
27 search, contacted relevant data providers and will participate in data extraction and analysis. ES  
28 will provide statistical expertise and support. IDP is the guarantor of this publication, contributed  
29 to the writing of the protocol manuscript, participated in the systematic review literature search,  
30 and approved the final manuscript. All authors reviewed and approved the final manuscript.  
31  
32  
33  
34  
35  
36  
37  
38

39 **Author declaration of conflicts of interest**  
40

41  
42 **SC:** received a non-restricted research grant from Sanofi-Genzyme for investigator-initiated type  
43 2 innovation research and received speaker honoraria from GlaxoSmithKline, Sanofi-Regeneron  
44 and AstraZeneca; outside the submitted work. **ES:** receives royalties from Springer for the  
45 textbook entitled Clinical Prediction Models and received speaker honoraria from  
46 GlaxoSmithKline; outside the submitted work. **RB** has received honoraria for presentations or  
47 consulting in Adboards from AstraZeneca, Asthma and Respiratory Foundation of New Zealand,  
48  
49  
50  
51  
52  
53  
54  
55  
56  
57

1  
2  
3 Avillion, Cipla and Theravance; and research grants from AstraZeneca, CureKids (NZ),  
4 Genentech, and the Health Research Council of New Zealand. **IDP:** In the last 5 years, IP has  
5 received speaker's honoraria for speaking at sponsored meetings from AstraZeneca, Boehringer  
6 Ingelheim, Aerocrine AB, Almirall, Novartis, Teva, Chiesi, Sanofi/Regeneron, Menarini, and  
7 GSK, and payments for organising educational events from AstraZeneca, GSK, Sanofi/Regeneron,  
8 and Teva. He has received honoraria for attending advisory panels with Genentech,  
9 Sanofi/Regeneron, AstraZeneca, Boehringer Ingelheim, GSK, Novartis, Teva, Merck, Circassia,  
10 Chiesi, and Knopp, and payments to support FDA approval meetings from GSK. He has received  
11 sponsorship to attend international scientific meetings from Boehringer Ingelheim, GSK,  
12 AstraZeneca, Teva, and Chiesi. He has received a grant from Chiesi to support a phase 2 clinical  
13 trial in Oxford. He is co-patent holder of the rights to the Leicester Cough Questionnaire and has  
14 received payments for its use in clinical trials from Merck, Bayer, and Insmad. In 2014-2015 he  
15 was an expert witness for a patent dispute involving AstraZeneca and Teva.  
16  
17  
18  
19  
20  
21  
22  
23  
24  
25  
26  
27  
28  
29  
30  
31  
32  
33  
34  
35  
36  
37  
38  
39  
40  
41  
42  
43  
44  
45  
46  
47  
48  
49  
50  
51  
52  
53  
54  
55  
56  
57  
58  
59  
60

**ABSTRACT:**

**Introduction:** The reduction of the risk of asthma attacks is a major goal of guidelines. The fact that type-2 inflammatory biomarkers identify a higher risk, anti-inflammatory responsive phenotype is potentially relevant to this goal. We aim to quantify the relation between blood eosinophils, exhaled nitric oxide (FeNO) and the risk of severe asthma attacks.

**Methods and Analysis:** A systematic review of randomised controlled trials (RCTs) will be conducted by searching MEDLINE from January 1993 to April 2021. We will include RCTs that investigated the effect of fixed treatment(s) regimen(s) on severe asthma exacerbation rates over at least 6 months and reported a baseline value for blood eosinophils and FeNO. Study selection will follow the Preferred Reporting Items for Systematic Reviews and Meta-Analyses guidelines, and the methodological appraisal of the studies will be assessed by the Cochrane Risk-of-Bias Tool for RCTs. Study authors will be contacted to request anonymised individual participant data for patients randomised to the trial's control arm (*i.e.* no inhaled corticosteroid (ICS), lowest dose ICS, or placebo). An individual participant data meta-analysis will be performed for multivariable prognostic modelling with performance assessment (calibration plots and the c-statistic) in a cross-validation by study procedure. The outcome to predict is the absolute number of severe asthma attacks to occur in the following 12 months if anti-inflammatory therapy is not changed (*i.e.*: if patient were randomised to the control arm of an RCT). A summary prognostic equation and risk stratification chart will be reported as a basis for further analyses of individualized treatment benefit.

**Ethics and Dissemination:** The protocol has been reviewed by the relevant Oxford academic ethics committee and found to comprise fully anonymised data not requiring further ethical

1  
2  
3 approbation. Results will be communicated in an international meeting and submitted to a peer-  
4  
5 reviewed journal.  
6  
7

8  
9 **Registration details:** PROSPERO CRD42021245337.  
10

11  
12 **Word count:** 299/300  
13  
14

## 15 **ARTICLE SUMMARY**

### 16 17 18 **Strengths and limitations of this study**

- 19  
20  
21  
22 • The prognostic (*i.e.* predicting adverse outcomes) and theragnostic (*i.e.* predicting  
23 treatment responsiveness) values of type-2 inflammatory biomarkers are established; we  
24 thus speculate that a clinical prediction model centred on blood eosinophils and exhaled  
25 nitric oxide will provide a useful framework for a preventive, treatable trait-based  
26 management.  
27  
28
- 29  
30  
31  
32 • This systematic review and individual patient data (IPD) level meta-analysis of randomised  
33 controlled trials (RCTs) across the spectrum of asthma severities will offer support for  
34 clinical decision-making based on type-2 inflammatory biomarkers and other clinical  
35 prognostic factors.  
36  
37
- 38  
39  
40  
41 • We aim to include data from a substantial number of RCTs ( $N > 10$ ) for a large number of  
42 patients in total ( $n > 5000$ ), which allows for reliable statistical modelling (internal validity)  
43 and assessment of transportability across settings (external validity).  
44  
45
- 46  
47  
48  
49 • The participating studies' authors and sponsors will form an international, collaborative,  
50 and not-for-profit consortium to allow efficient use of high-quality IPD.  
51  
52  
53  
54  
55  
56  
57  
58  
59  
60

- 1  
2  
3  
4  
5  
6  
7
- Potential weaknesses are the low number of events reported in RCTs enrolling mild asthmatics and the absence of active arm IPD.

8  
9 **Word count: 5 / 5 one-sentence bullet points**

10  
11  
12  
13  
14  
15  
16  
17  
18  
19  
20  
21  
22  
23  
24  
25  
26  
27  
28  
29  
30  
31  
32  
33  
34  
35  
36  
37  
38  
39  
40  
41  
42  
43  
44  
45  
46  
47  
48  
49  
50  
51  
52  
53  
54  
55  
56  
57  
58  
59  
60

For peer review only



## ABBREVIATIONS

CI: confidence intervals

FeNO: fractional exhaled nitric oxide

GINA: Global Initiative for Asthma

ICS: inhaled corticosteroid

IL: interleukin

IPD: individual participant data

MA: meta-analysis

RCT: randomised controlled trial

For peer review only

## INTRODUCTION

Reduction of the risk of severe asthma attacks is a major goal of asthma management [1]. The current recommendation is to perform risk assessment based on a history of a previous asthma attack and a list of clinical risk factors (Table 1) [1]. However, many of these prognostic factors are unmodifiable or difficult to modify and a key risk factor (treatment adherence) is difficult to identify and quantify before starting treatment. In contrast, some risk factors are modifiable, such as symptoms and lung function, while they are not necessarily on the causal pathway of asthma attacks. As a result of these deficiencies, risk quantification in asthma is an inexact art and the impact of treatment is difficult to predict [2-13].

One approach to targeted risk reduction is to use a scale centred on readily available prognostic factors that quantify the risk of the adverse outcome of interest in a manner which also predicts the benefits of preventative treatment. This approach has been successful in cardiovascular disease risk reduction where charts [14,15] focus on modifiable factors such as blood pressure and cholesterol with age and gender as key prognostic demographic factors. We speculate that a similar framework can be applied to predict asthma attacks in patients with asthma.

Type-2 airway inflammation is important in the pathogenesis of many asthma attacks [16] where this immune response characterised by interleukin (IL)-4, IL-5, IL-13, and eosinophilic airway infiltration forms a distinct clinical phenotype [16]. In clinic, the actions of type-2 immunity are readily identified by two independent, complementary, and accessible biomarkers: the peripheral blood eosinophil count and fractional exhaled nitric oxide (FeNO) [17–23]. Importantly, the excess risk conferred by raised type-2 biomarkers can be removed with appropriate treatment, be it low-dose inhaled corticosteroids (ICS) in mild asthma [19,24], a higher dose of ICS in moderate asthma

[21], or biological agents targeting type 2 cytokines in moderate and severe asthma [18,25–27]. In effect, blood eosinophils and FeNO have emerged as ‘treatable traits’ [28].

We have previously established a proof-of-concept biomarker-stratified asthma attack scale using publication-level data which is promising and potentially useful to support clinical decision-making [22]. The prototype lacked detailed and statistically robust assessment of multivariable prognostic relations and systematic assessment of external validity, which is possible with an individual participant data (IPD) meta-analysis (MA).

### Review question

In people  $\geq 12$  years old diagnosed with asthma of any severity randomised to the control arm of a clinical trial, what is the absolute number of severe asthma attacks (defined as acute asthma requiring  $\geq 3$  days of systemic corticosteroids and/or hospitalisation)[29] to occur in the following 12 months in relation to their peripheral blood eosinophil count, FeNO, and other prognostic factors at baseline?

### Objectives

Specific aims of this systematic review are

1. To systematically identify randomised controlled trials (RCTs) in people  $\geq 12$  years old diagnosed with asthma of any severity which measured i) the peripheral blood eosinophil count and FeNO at baseline and ii) assessed the incident severe asthma attacks over  $\geq 6$  months of follow-up.
2. To perform an IPD MA for the participants randomised to the control arms (defined as no inhaled corticosteroid (ICS), lowest dose ICS, or placebo) of the RCTs identified in aim 1.

- 3 3. To assess the multivariable prognostic relations of the peripheral blood eosinophil count,  
4 FeNO, and other risk factors assessed at baseline.
- 5  
6  
7  
8 4. To develop and validate a clinical prediction model for the absolute number of severe  
9  
10 asthma attacks to occur in the following 12 months in relation to the peripheral blood  
11  
12 eosinophil count, FeNO, and other risk factors at baseline.  
13

## 14 15 **METHODS AND ANALYSIS**

### 16 17 **Eligibility**

#### 18 19 *Types of studies*

20  
21  
22 In keeping with the objectives of the systematic review, we will include RCTs completed between  
23  
24 1 January 1993 and 1 April 2021 that investigated the effect of fixed treatment(s) regimen(s) on  
25  
26 severe asthma attack rates over at least 6 months, also reporting a baseline value for blood  
27  
28 eosinophils and FeNO.  
29  
30  
31

#### 32 33 *Types of participants*

34  
35 We will include studies on participants ages 12 and over diagnosed with asthma of any severity  
36  
37 according to objective criteria. We will exclude patients if both the baseline blood eosinophil count  
38  
39 and FeNO are missing. We will also exclude patients with missing follow-up duration whilst on  
40  
41 the allocated therapy, or missing number of severe asthma attacks during follow-up.  
42  
43  
44  
45

#### 46 47 *Types of interventions*

48  
49 We will request IPD for the control arm(s) of each trial. We define the ‘control arm’ as patients  
50  
51 with the lowest anti-inflammatory therapy intensity after randomisation (*i.e.* group with no ICS,  
52  
53 lowest dose ICS, or placebo).  
54  
55  
56  
57

1  
2  
3 *Types of comparison conditions*  
4

5 Not applicable, as this is a prognostic IPD MA.  
6  
7

8  
9 *Types of outcome measures*  
10

11 The outcome is the occurrence of severe asthma attacks, defined as the number of acute asthma  
12 episodes requiring  $\geq 3$  days of systemic corticosteroids and/or hospitalisation. This was the  
13 primary outcome in many RCTs. Severe asthma attacks are important for patients, physicians, and  
14 health insurance providers due to the high morbidity and financial burden [29]. The severe asthma  
15 attack rate is known to be modifiable following appropriate anti-inflammatory therapy in patients  
16 with high type-2 biomarkers [18,19,21]. The minimal clinically important difference for the  
17 annualised severe asthma attack rates in RCTs has not been determined, although it has been  
18 estimated to be 20-40% in a recent expert consensus document [30].  
19  
20  
21  
22  
23  
24  
25  
26  
27  
28  
29

30  
31 **Search strategy**  
32

33  
34 We will search MEDLINE (PubMed interface) for RCTs from 1 January 1993 to 1 April 2021 that  
35 fit the eligibility criteria.  
36  
37

38  
39 Our search will use the term 'asthma exacerbations' (("asthma"[MeSH Terms] OR "asthma"[All  
40 Fields] OR "asthmas"[All Fields] OR "asthma s"[All Fields]) AND ("exacerbate"[All Fields] OR  
41 "exacerbated"[All Fields] OR "exacerbates"[All Fields] OR "exacerbating"[All Fields] OR  
42 "exacerbation"[All Fields] OR "exacerbations"[All Fields] OR "exacerbator"[All Fields] OR  
43 "exacerbators"[All Fields])), filtered for 'randomised controlled trials' 'humans' 'ages 12 and  
44 over' and languages English and French. The details of the PubMed query are listed in the  
45 Supplementary Material. Literature search results will be uploaded to Microsoft EndNote. Titles  
46 and abstracts of all records returned by the literature search will be screened to identify potentially  
47  
48  
49  
50  
51  
52  
53  
54  
55  
56  
57

1  
2  
3 relevant publications which include the word 'eosinophil' OR 'FeNO' OR 'nitric oxide' OR  
4  
5 'exhaled NO'. Manual reference searching will be performed for completed clinical trials that are  
6  
7 in press at the time of the systematic review. Two reviewers (SC and IDP) will independently  
8  
9 review the retained publications to select trials for inclusion. We will resolve disagreement through  
10  
11 discussion. We will record the reasons for excluding trials. Neither of the authors will be blind to  
12  
13 the journal titles or to the study authors or institutions.  
14  
15

## 16 17 18 **Data collection**

### 19 20 21 *Request for individual participant data*

22  
23 The authors of the retained studies will be contacted to obtain IPD. The corresponding author of  
24  
25 each publication, and the representative(s) of the trial sponsor when applicable, will be sent an  
26  
27 invitation letter and a skeleton Microsoft Excel spreadsheet containing the relevant fields for data  
28  
29 extraction.  
30  
31

### 32 33 34 *Data items*

35  
36 Anonymised individual patient data to be requested includes demographics (age, body mass  
37  
38 index); baseline lung function with post-bronchodilator reversibility; treatment step according to  
39  
40 anti-inflammatory components (Table 2); inhaled corticosteroid daily dosage; other asthma  
41  
42 controller or reliever medications; presence of any Global Initiative for Asthma (GINA) defined  
43  
44 risk factors (Table 1) at baseline, when available; severe asthma attack history in the year prior to  
45  
46 trial enrolment; the intervention the patient was randomised to; the peripheral blood eosinophil  
47  
48 count, total immunoglobulin E, specific airborne sensitisation, and FeNO at baseline; duration of  
49  
50 follow-up under controlled therapy; and the outcome of interest, *i.e.* the number of severe asthma  
51  
52 attacks during follow-up.  
53  
54  
55  
56  
57  
58  
59  
60

### *Risk of bias in individual studies*

To facilitate the assessment of possible bias for each study, we will collect information using the Cochrane Collaboration tool for assessing the risk of bias [31], which covers: sequence generation, allocation concealment, blinding, incomplete outcome data (e.g. dropouts and withdrawals) and selective outcome reporting. For each domain in the tool, we will detail the procedures undertaken for each study, including verbatim quotes. A judgement as to the risk of bias on each of the six domains will be made from the extracted information, rated as ‘high risk’ or ‘low risk’. If there is insufficient detail reported in the study, we will judge the risk of bias as ‘unclear’ and the original study investigators will be contacted for more information. These judgements will be made independently by two authors based on the criteria for judging the risk of bias [31]. Disagreements will be resolved first by discussion and then by consulting a third author for arbitration. We will compute graphic representations of potential bias within and across studies. We will consider each item in the risk of bias assessment independently without an attempt to collate and assign an overall score.

### **Data extraction**

Data providers contacted following the systematic review will be provided sufficient time and support to confirm their consent for data extraction through data sharing contracts. Data sharing will be free of charge, financial contributions, and/or barriers to the dissemination of the results.

### **Data management and sharing**

Secure digital transfer and storage solutions are provided by the University of Oxford. Under the terms of the data sharing agreements, access to the complete dataset is restricted to the named

1  
2  
3 authors on the current study protocol who are bound by contract to the University of Oxford. Future  
4  
5 third-party data sharing requests will need to be submitted to the original study authors.  
6  
7

## 8 9 **Data analysis and synthesis**

10  
11  
12 In relation with the objectives of this study, the data will be analysed and presented according to  
13  
14 the following formats:

- 15  
16  
17  
18 1. Results of the systematic review will be reported as per Preferred Reporting Items for  
19  
20 Systematic Reviews and Meta-Analyses (PRISMA) guidelines [32]. All identified studies  
21  
22 will be enumerated and detailed, irrespective of the provision of individual participant data.  
23
- 24  
25 2. Results of the multivariable prognostic analysis will report on univariate and multivariable  
26  
27 coefficients from binomial negative regression on the annualised severe asthma attack  
28  
29 rates. Important predictors to be assessed are the baseline blood eosinophil count and  
30  
31 baseline FeNO values. Reporting will be in categories according to commonly accepted  
32  
33 cut-offs (blood eosinophils,  $0.15- < 0.30$ ,  $\geq 0.30 \times 10^9$  cells/L; FeNO,  $< 25$ ,  $25- < 50$ ,  $\geq 50$  ppb),  
34  
35 with more detailed modelling as continuous variables. Non-linearity will be explored with  
36  
37 `rCS` functions, with the number of knots guided by AIC. Relations will be plotted with  
38  
39 95% confidence intervals (CI). Other important prognostic factors include treatment steps  
40  
41 (as per Table 2), asthma attack history, postbronchodilator forced expiratory volume in 1  
42  
43 second percentage predicted, mean score on the 5-item Asthma Control Questionnaire, and  
44  
45 body mass index. Interactions between blood eosinophil and FeNO values will be assessed  
46  
47 according to AIC. If relevant, combined effects will be summarised in a  $3 \times 3$  matrix  
48  
49 stratified by the blood eosinophil count ( $< 0.15$ ,  $0.15- < 0.30$ ,  $\geq 0.30 \times 10^9$  cells/L) and FeNO  
50  
51  
52  
53  
54  
55  
56  
57  
58  
59  
60



1  
2  
3 (<25, 25-<50, ≥50 ppb), and plotted in interaction plots with 95% CI. Heterogeneity in  
4  
5 estimates between studies will be quantified by  $I^2$  statistics.  
6  
7

- 8 3. Clinical prediction modelling will be based on the statistical analysis plan (version 1)  
9  
10 presented in the Supplementary Material. Briefly, we will use the study population as a  
11  
12 derivation cohort, with stratification by study. Validation will be according to an internal  
13  
14 – external cross-validation procedure, where each study is left out once [33]. The selection  
15  
16 of predictors will be based on the results of the multivariable prognostic analyses. A  
17  
18 summary prognostic equation will be produced, assessed by the principal investigators, and  
19  
20 adapted to GINA treatment step reference attack rates (*e.g.*: [34]) to allow for a user-  
21  
22 friendly prediction summary table similar to the reported prototype (figure). Performance  
23  
24 of the predictive equation and table will be assessed separately with calibration plots, c-  
25  
26 statistic, and decision-analytic measures as outlined in the statistical analysis plan (see  
27  
28 Supplementary Material).  
29  
30  
31  
32  
33

### 34 *Study power*

35  
36 Considering a mean annualised severe asthma attack of 0.6 in the entire study population and a  
37  
38 conservative estimate that the derivation cohort will comprise 50% of the individual patient data  
39  
40 reported in our prototype scale ( $0.5 \times 3051 = 1525$ ) [22], there should be approximately 915 events  
41  
42 to derive a clinical prediction model. This provides for a solid basis for statistical modelling  
43  
44 considering the limited number of potential predictors (around 10), leading a favourable event per  
45  
46 variable (EPV) ratio (EPV=92) [35]. However, we concede that the EPV will be considerably  
47  
48 lower for mild asthma populations, where trials identified less than 100 severe asthma attack events  
49  
50 in their control arms [24,36]. Conversely, the study will be more than adequately powered for  
51  
52 moderate-to-severe asthma.  
53  
54  
55  
56  
57  
58  
59  
60

### *Statistical software and confidence intervals*

Data analysis will be conducted in collaboration with the study statistician (ES) using R software and the `rms` package. Reported outputs will present estimates and accompanying two-sided 95% CI. Bootstrap resampling will be applied to assess internal validity. Cross-validation by study will be performed to assess external validity.

### **Ethics and dissemination**

The protocol has been reviewed by the academic ethics committee (Oxford Tropical Research Ethics Committee (OxTREC)) and found to comprise fully anonymised data not requiring further ethical approbation. The results of the systematic review, patient-level multivariable prognostic MA, and clinical prediction models will be presented in an international scientific meeting and submitted for publication.

## DISCUSSION

This protocol for a systematic review and IPD MA of RCTs across the spectrum of asthma severities coincides with a clinical prediction modelling effort centred on the peripheral blood eosinophil count and FeNO. Indeed, we speculate that these two biomarkers are the airway equivalent of high blood pressure and serum cholesterol, insofar as they identify a pathological process which relates to the risk key adverse outcomes (asthma attacks) that is modifiable by treatment (anti-inflammatory medication).

The focus on two biomarkers to predict the modifiable risk of asthma attacks is novel compared to existing clinical prediction models [2-13], where prognostic variables do not include nor adjust for blood eosinophils and FeNO. The established prognostic (*i.e.* predicting adverse outcomes) and theragnostic (*i.e.* predicting treatment responsiveness) values of these type-2 inflammatory biomarkers [17-23] provide a strong basis for a clinical prediction model centred on these independent, additive, and, most importantly, modifiable risk factors. The current protocol extends our previous proof-of-concept [22] work suggesting that traditional clinical risk factors can and should be adjusted for type-2 inflammatory biomarkers. Another novel aspect of our project is our intention to collaborate with a wide variety of authors and sponsors to form an international, data-driven, and not-for-profit consortium to support the development and validation of a robust clinical prediction model.

Despite the rigorous PRISMA [32] and Cochrane [31] methodologies which will be used to identify high-quality RCTs, there are areas of potential weaknesses in our study design which warrant discussion. First, we will limit our search strategy to MEDLINE. This approach was decided after a preliminary search in MEDLINE alone showed potential for >5000 control arm

1  
2  
3 patients eligible to the IPD MA component; more than required to power our multivariable  
4 prognostic assessment and sufficient to claim that the included studies will be identified  
5 systematically rather than subjectively. Second, RCTs enrolling mild asthmatics have reported low  
6 absolute severe asthma attack rates [24,36], which may limit the model's reliability for low-risk  
7 patients. Third, a RCT-based clinical prediction model will be difficult to subsequently validate in  
8 real-world settings where treatment intensity fluctuates in response to the perceived risk of asthma  
9 attacks. Such real-world fluctuation in treatment regimens may weaken the relation between static  
10 biomarker measurements and 12-month observed asthma attack rates. Nevertheless, we speculate  
11 that physician-patient discussions can be assisted by a clinical prediction model which estimates  
12 the risk of asthma attacks if anti-inflammatory treatment is not changed, *i.e.*: if the patient were  
13 randomised to the control arm of an RCT. Fourth, controlled trials in asthma are notorious for a  
14 strong placebo effect. This caveat may be due to improved adherence to ICS, the Hawthorne effect,  
15 regression to the mean, or a combination of factors [37]. It is potentially surmountable by adapting  
16 the resultant clinical prediction model using reference asthma attack rates according to treatment  
17 intensity, as previously reported in a claims-based study [34] and proposed in our statistical  
18 analysis plan. Last, we have not planned to request active arm individual participant data, thus  
19 limiting our ability to assess the individual treatment benefit [38] or model heterogeneity of  
20 treatment effects [39]. We will not pursue the active arms' data for political reasons but envision  
21 a de-centralised computation of individual treatment benefit and aggregate performance measures,  
22 such as the c-for-benefit statistic, at a later stage.

23  
24  
25  
26  
27  
28  
29  
30  
31  
32  
33  
34  
35  
36  
37  
38  
39  
40  
41  
42  
43  
44  
45  
46  
47  
48  
49  
50 To conclude, we propose a systematic review and IPD MA to predict severe asthma attacks based  
51 on the inflammatory and clinical risk profile. Our emphasis on the risk conferred by raised type-2  
52 inflammatory biomarkers and the consortium approach central to our endeavour and may  
53  
54  
55  
56  
57  
58  
59  
60

1  
2  
3 distinguishes it from existing prediction models [2-13]. We speculate that a clinical prediction  
4  
5 model centred on blood eosinophils and FeNO will provide a useful basis for a preventive, treatable  
6  
7 trait-based management.  
8  
9  
10  
11  
12  
13  
14  
15  
16  
17  
18  
19  
20  
21  
22  
23  
24  
25  
26  
27  
28  
29  
30  
31  
32  
33  
34  
35  
36  
37  
38  
39  
40  
41  
42  
43  
44  
45  
46  
47  
48  
49  
50  
51  
52  
53  
54  
55  
56  
57  
58  
59  
60

For peer review only

**TABLE 1**  
**Clinical risk factors for asthma exacerbations with their traditional categorisations**

| <b>Risk factors</b>                                         | <b>Value (if pertinent)</b>                           |
|-------------------------------------------------------------|-------------------------------------------------------|
| <b>Poor control of asthma symptoms</b>                      | mean ACQ score $\geq$ 1.5                             |
| <b>Limited lung function:</b>                               |                                                       |
| low FEV1                                                    | < 60-80% predicted                                    |
| high postbronchodilator reversibility                       | >12% change in FEV1                                   |
| <b>Adherence poor (inadequate technique or inhaler use)</b> |                                                       |
| <b>Reliever use excessive</b>                               | > one 200-dose canister/month                         |
| <b>Intubation or ICU admission for asthma on history</b>    |                                                       |
| <b>Comorbidities:</b>                                       |                                                       |
| chronic rhinosinusitis                                      |                                                       |
| obesity                                                     | body mass index $\geq$ 35 kg/m <sup>2</sup>           |
| psychiatric disease                                         | psychosis, substance abuse                            |
| <b>Environmental exposure:</b>                              |                                                       |
| smoking                                                     |                                                       |
| allergen exposure in sensitised patient                     |                                                       |
| air pollution                                               | especially high O <sub>3</sub> and/or NO <sub>2</sub> |

ACQ = asthma control questionnaire; FEV1 = forced expiratory volume in 1 second; ICU = intensive care unit; PoLAR ICE = mnemonic (see bold characters in table). Adapted from Global Initiative for Asthma Guidelines [1]. Where possible, risk factors will also be analysed in continuous versions with restricted cubic splines to allow for non-linear associations.

**TABLE 2**  
**Treatment step definitions**

| Treatment step | Definition                                                                                                                                                                      |
|----------------|---------------------------------------------------------------------------------------------------------------------------------------------------------------------------------|
| <b>Step 1</b>  | As-needed short-acting beta2-agonist                                                                                                                                            |
| <b>Step 2</b>  | Daily low dose ICS <u>or</u><br>As-needed low dose ICS-formoterol<br>Daily leukotriene receptor agonist                                                                         |
| <b>Step 3</b>  | Daily low dose ICS + an additional controller therapy                                                                                                                           |
| <b>Step 4</b>  | Any medium dose ICS-containing regimen                                                                                                                                          |
| <b>Step 5</b>  | Any high dose ICS-containing regimen <u>or</u><br>Any maintenance systemic corticosteroid use (defined as use of systemic corticosteroids for $\geq 50\%$ of the previous year) |

ICS, inhaled corticosteroid. Modified from Global Initiative for Asthma 2017 and 2021 [1]

guidelines.

## FIGURE LEGEND

**The prototype OxfoRd Asthma attaCk risk scaLE.** Numbers in each cell are predicted annual asthma attack rates for patients over the age of 12 if treatment is not changed. An asthma attack is an episode of acute asthma requiring treatment with systemic steroids  $\geq 3$  days and/or hospitalisation. The blood eosinophil count is contemporaneous or the highest result in last 12 months; fractional exhaled nitric oxide level (FeNO) is contemporaneous. \*Risk factors are defined by the Global Initiative for Asthma (GINA) guidelines [1]: poor symptom control (ACQ score  $\geq 1.5$ ), low lung function (FEV1  $< 80\%$  predicted), adherence issues, reliever over-use ( $> 200$ -dose salbutamol cannister/month), intubation or intensive care unit admission for asthma previously, comorbidities (one of: chronic rhinosinusitis, obesity, psychiatric disease), environmental exposures (one of: smoking, allergen, pollution). Reproduced from reference [22] with permission under the original CC BY public copyright license.



## REFERENCES

- 1 Global Initiative for Asthma (GINA). Global Strategy for Asthma Management and Prevention (2021 update). 2021. <https://ginasthma.org/>
- 2 Bateman ED, Buhl R, O'Byrne PM, *et al.* Development and validation of a novel risk score for asthma exacerbations: The risk score for exacerbations. *J Allergy Clin Immunol* 2015;**135**:1457-1464.e4. doi:10.1016/j.jaci.2014.08.015
- 3 Miller MK, Lee JH, Blanc PD, *et al.* TENOR risk score predicts healthcare in adults with severe or difficult-to-treat asthma. *Eur Respir J* 2006;**28**:1145–55. doi:10.1183/09031936.06.00145105
- 4 Loymans RJBB, Honkoop PJ, Termeer EH, *et al.* Identifying patients at risk for severe exacerbations of asthma: development and external validation of a multivariable prediction model. *Thorax* 2016;**71**:838–46. doi:10.1136/thoraxjnl-2015-208138
- 5 Eisner MD, Yegin A, Trzaskoma B. Severity of asthma score predicts clinical outcomes in patients with moderate to severe persistent asthma. *Chest* 2012;**141**:58–65. doi:10.1378/chest.11-0020
- 6 Sato R, Tomita K, Sano H, *et al.* The Strategy for Predicting Future Exacerbation of Asthma Using a Combination of the Asthma Control Test and Lung Function Test. *J Asthma* 2009;**46**:677–82. doi:10.1080/02770900902972160
- 7 Peters D, Chen C, Markson LE, *et al.* Using an asthma control questionnaire and administrative data to predict health-care utilization. *Chest* 2006;**129**:918–24.

- 1  
2  
3 doi:10.1378/chest.129.4.918  
4  
5  
6  
7 8 Yurk RA, Diette GB, Skinner EA, *et al.* Predicting Patient-Reported Asthma Outcomes for  
8  
9 Adults in Managed Care. *Am J Manag Care* 2004;**10**:321–8.  
10  
11  
12 9 Schatz M, Cook EF, Joshua A, *et al.* Risk factors for asthma hospitalizations in a managed  
13  
14 care organization: Development of a clinical prediction rule. *Am J Manag Care* 2003;**9**:538–  
15  
16 47.  
17  
18  
19  
20 10 Lieu TA, Capra AM, Quesenberry CP, *et al.* Computer-based models to identify high-risk  
21  
22 adults with asthma: Is the glass half empty or half full? *J Asthma* 1999;**36**:359–70.  
23  
24 doi:10.3109/02770909909068229  
25  
26  
27  
28 11 Ellman MS, Viscoli CM, Sears MR, *et al.* A new index of prognostic severity for chronic  
29  
30 asthma. *Chest* 1997;**112**:582–90. doi:10.1378/chest.112.3.582  
31  
32  
33  
34 12 Grana J, Preston S, McDermott PD, *et al.* The Use of Administrative Data to Risk-Stratify  
35  
36 Asthmatic Patients. *Am J Med Qual* 1997;**12**:113–9. doi:10.1177/0885713X9701200205  
37  
38  
39  
40 13 Osborne ML, Pedula KL, O'Hollaren M, *et al.* Assessing future need for acute care in adult  
41  
42 asthmatics: The profile of asthma risk study: A prospective health maintenance  
43  
44 organization-based study. *Chest* 2007;**132**:1151–61. doi:10.1378/chest.05-3084  
45  
46  
47  
48 14 Jackson R, Barham P, Bills J, *et al.* Management of raised blood pressure in New Zealand:  
49  
50 A discussion document. *Br. Med. J.* 1993;**307**:107–10. doi:10.1136/bmj.307.6896.107  
51  
52  
53 15 Conroy RM, Pyörälä K, Fitzgerald AP, *et al.* Estimation of ten-year risk of fatal  
54  
55 cardiovascular disease in Europe: The SCORE project. *Eur Heart J* 2003;**24**:987–1003.  
56  
57  
58  
59  
60

- 1  
2  
3 doi:10.1016/S0195-668X(03)00114-3  
4  
5  
6  
7 16 Pavord ID, Beasley R, Agusti A, *et al.* After asthma: redefining airways diseases. *Lancet*.  
8  
9 2018;**391**:350–400. doi:10.1016/S0140-6736(17)30879-6  
10  
11  
12 17 Busse WW, Wenzel SE, Casale TB, *et al.* Baseline FeNO as a Prognostic Biomarker for  
13  
14 Subsequent Severe Asthma Exacerbations in Patients With Uncontrolled, Moderate-to-  
15  
16 Severe Asthma Receiving Placebo in the LIBERTY ASTHMA QUEST Study: A Post Hoc  
17  
18 Analysis. *Lancet Respir Med* 2021;**0**. doi:10.1016/S2213-2600(21)00124-7  
19  
20  
21  
22 18 Shrimanker R, Keene O, Hynes G, *et al.* Prognostic and predictive value of blood eosinophil  
23  
24 count, fractional exhaled nitric oxide, and their combination in severe asthma: A post hoc  
25  
26 analysis. *Am J Respir Crit Care Med* 2019;**200**:1308–12. doi:10.1164/rccm.201903-  
27  
28 0599LE  
29  
30  
31  
32 19 Pavord ID, Holliday M, Reddel HK, *et al.* Predictive value of blood eosinophils and exhaled  
33  
34 nitric oxide in adults with mild asthma: a prespecified subgroup analysis of an open-label,  
35  
36 parallel-group, randomised controlled trial. *Lancet Respir Med* 2020;**8**:671–80.  
37  
38 doi:10.1016/S2213-2600(20)30053-9  
39  
40  
41  
42  
43 20 Kraft M, Brusselle G, Mark FitzGerald J, *et al.* Patient characteristics, biomarkers, and  
44  
45 exacerbation risk in severe, uncontrolled asthma. *Eur Respir J* Published Online First: 10  
46  
47 June 2021. doi:10.1183/13993003.00413-2021  
48  
49  
50  
51 21 Lee LA, Bailes Z, Barnes N, *et al.* Efficacy and safety of once-daily single-inhaler triple  
52  
53 therapy (FF/UMEC/VI) versus FF/VI in patients with inadequately controlled asthma  
54  
55 (CAPTAIN): a double-blind, randomised, phase 3A trial. *Lancet Respir Med* 2021;**9**:69–  
56  
57  
58  
59  
60

- 1  
2  
3 84. doi:10.1016/S2213-2600(20)30389-1  
4  
5  
6  
7 22 Couillard S, Laugerud A, Jabeen M, *et al.* Derivation of a prototype asthma attack risk scale  
8 centred on blood eosinophils and exhaled nitric oxide. *Thorax* Published Online First: 2021.  
9 doi:10.1136/thoraxjnl-2021-217325  
10  
11  
12  
13  
14 23 Couillard S, Shrimanker R, Chaudhuri R, *et al.* FeNO Non-Suppression Identifies  
15 Corticosteroid-Resistant Type-2 Signaling in Severe Asthma. *Am J Respir Crit Care Med*  
16 Published Online First: 15 June 2021. doi:10.1164/rccm.202104-1040LE  
17  
18  
19  
20  
21  
22 24 Beasley R, Holliday M, Reddel HK, *et al.* Controlled trial of budesonide-formoterol as  
23 needed for mild asthma. *N Engl J Med* 2019;**380**:2020–30. doi:10.1056/NEJMoa1901963  
24  
25  
26  
27  
28 25 Pavord ID, Korn S, Howarth P, *et al.* Mepolizumab for severe eosinophilic asthma  
29 (DREAM): A multicentre, double-blind, placebo-controlled trial. *Lancet* 2012;**380**:651–9.  
30 doi:10.1016/S0140-6736(12)60988-X  
31  
32  
33  
34  
35  
36 26 Castro M, Corren J, Pavord ID, *et al.* Dupilumab Efficacy and Safety in Moderate-to-Severe  
37 Uncontrolled Asthma. *N Engl J Med* 2018;**378**:2486–96. doi:10.1056/NEJMoa1804092  
38  
39  
40  
41 27 Menzies-Gow A, Corren J, Bourdin A, *et al.* Tezepelumab in Adults and Adolescents with  
42 Severe, Uncontrolled Asthma. *N Engl J Med* 2021;**384**:1800–9.  
43 doi:10.1056/NEJMoa2034975  
44  
45  
46  
47  
48  
49 28 Agusti A, Bel E, Thomas M, *et al.* Treatable traits: Toward precision medicine of chronic  
50 airway diseases. *Eur Respir J* 2016;**47**:410–9. doi:10.1183/13993003.01359-2015  
51  
52  
53  
54  
55 29 Reddel HK, Taylor DR, Bateman ED, *et al.* An official American Thoracic  
56  
57  
58  
59  
60

- 1  
2  
3 Society/European Respiratory Society statement: Asthma control and exacerbations -  
4 Standardizing endpoints for clinical asthma trials and clinical practice. *Am J Respir Crit*  
5 *Care Med* 2009;**180**:59–99. doi:10.1164/rccm.200801-060ST  
6  
7  
8  
9  
10  
11 30 Bonini M, Di Paolo M, Bagnasco D, *et al*. Minimal clinically important difference for  
12 asthma endpoints: An expert consensus report. *Eur Respir Rev* 2020;**29**:1–14.  
13 doi:10.1183/16000617.0137-2019  
14  
15  
16  
17  
18  
19 31 Higgins J, Thomas J, Chandler J, *et al*. Cochrane Handbook for Systematic Reviews of  
20 Interventions (version 6.2). Cochrane. 2021. [www.training.cochrane.org/handbook](http://www.training.cochrane.org/handbook)  
21 (accessed 15 Sep 2021).  
22  
23  
24  
25  
26  
27 32 Shamseer L, Moher D, Clarke M, *et al*. Preferred reporting items for systematic review and  
28 meta-analysis protocols (PRISMA-P) 2015: elaboration and explanation. *BMJ Br Med J*  
29 2015;**349**:g7647. doi:10.1136/bmj.g7647  
30  
31  
32  
33  
34  
35 33 Steyerberg EW, Harrell FE. Prediction models need appropriate internal, internal-external,  
36 and external validation. *J. Clin. Epidemiol.* 2016;**69**:245–7.  
37 doi:10.1016/j.jclinepi.2015.04.005  
38  
39  
40  
41  
42  
43 34 Suruki RY, Daugherty JB, Boudiaf N, *et al*. The frequency of asthma exacerbations and  
44 healthcare utilization in patients with asthma from the UK and USA. *BMC Pulm Med*  
45 2017;**17**. doi:10.1186/s12890-017-0409-3  
46  
47  
48  
49  
50  
51 35 Steyerberg EW. *Clinical Prediction Models*. Cham: : Springer International Publishing  
52 2019. doi:10.1007/978-3-030-16399-0  
53  
54  
55  
56  
57  
58  
59  
60

- 1  
2  
3 36 Hardy J, Baggott C, Fingleton J, *et al.* Budesonide-formoterol reliever therapy versus  
4 maintenance budesonide plus terbutaline reliever therapy in adults with mild to moderate  
5 asthma (PRACTICAL): a 52-week, open-label, multicentre, superiority, randomised  
6 controlled trial. *Lancet (London, England)* 2019;**394**:919–28. doi:10.1016/S0140-  
7 6736(19)31948-8  
8  
9  
10  
11  
12  
13  
14  
15 37 Luc F, Prieur E, Whitmore GA, *et al.* Placebo Effects in Clinical Trials Evaluating Patients  
16 with Uncontrolled Persistent Asthma. <https://doi.org/10.1513/AnnalsATS201901-071OC>  
17 2019;**16**:1124–30. doi:10.1513/ANNALSATS.201901-071OC  
18  
19  
20  
21  
22  
23 38 van Klaveren D, Steyerberg EW, Serruys PW, *et al.* The proposed ‘concordance-statistic  
24 for benefit’ provided a useful metric when modeling heterogeneous treatment effects. *J Clin*  
25 *Epidemiol* 2018;**94**:59–68. doi:10.1016/j.jclinepi.2017.10.021  
26  
27  
28  
29  
30  
31 39 Kent DM, Paulus JK, Van Klaveren D, *et al.* The Predictive Approaches to Treatment effect  
32 Heterogeneity (PATH) statement. *Ann Intern Med* 2020;**172**:35–45. doi:10.7326/M18-3667  
33  
34  
35  
36  
37  
38  
39  
40  
41  
42  
43  
44  
45  
46  
47  
48  
49  
50  
51  
52  
53  
54  
55  
56  
57  
58  
59  
60

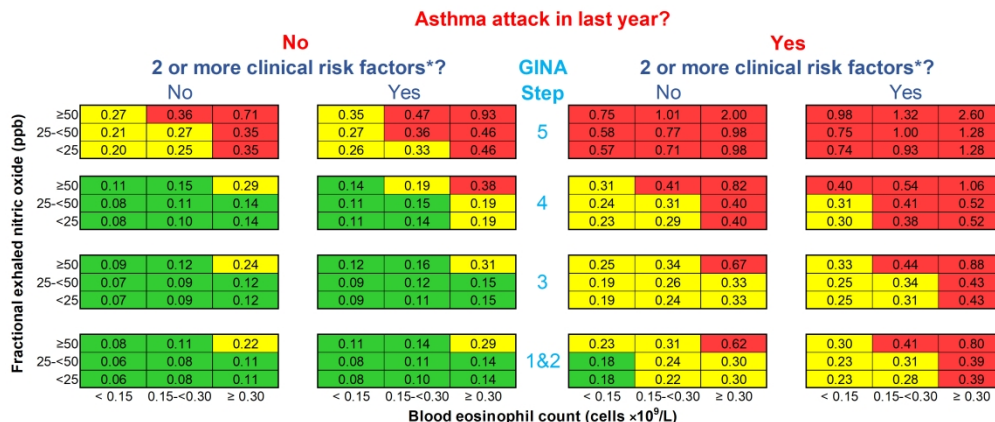

**The prototype Oxford Asthma attack risk scale.** Numbers in each cell are predicted annual asthma attack rates for patients over the age of 12 if treatment is not changed. An asthma attack is an episode of acute asthma requiring treatment with systemic steroids ≥ 3 days and/or hospitalisation. The blood eosinophil count is contemporaneous or the highest result in last 12 months; fractional exhaled nitric oxide level (FeNO) is contemporaneous. \*Risk factors are defined by the Global Initiative for Asthma (GINA) guidelines [1]: poor symptom control (ACQ score ≥1.5), low lung function (FEV1 <80% predicted), adherence issues, reliever over-use (>200-dose salbutamol canister/month), intubation or intensive care unit admission for asthma previously, comorbidities (one of: chronic rhinosinusitis, obesity, psychiatric disease), environmental exposures (one of: smoking, allergen, pollution). Reproduced from reference [22] with permission under the original CC BY public copyright license.

814x343mm (118 x 118 DPI)

1  
2  
3 **Blood eosinophils, fractional exhaled nitric oxide, and the risk of asthma**  
4 **attacks in randomised controlled trials: protocol for a systemic review and**  
5 **control arm patient-level meta-analysis for clinical prediction modelling**  
6  
7  
8  
9

10  
11  
12 Simon Couillard, Ewout W Steyerberg, Richard Beasley, Ian D Pavord  
13  
14  
15

16  
17  
18  
19  
20  
21  
22 **Supplementary Material**  
23  
24  
25  
26  
27  
28  
29  
30  
31  
32  
33  
34  
35  
36  
37  
38  
39  
40  
41  
42  
43  
44  
45  
46  
47  
48  
49  
50  
51  
52  
53  
54  
55  
56  
57  
58  
59  
60



1  
2  
3  
4  
5  
6  
7  
8  
9  
10  
11  
12  
13  
14  
15  
16  
17  
18  
19  
20  
21  
22  
23  
24  
25  
26  
27  
28  
29  
30  
31  
32  
33  
34  
35  
36  
37  
38  
39  
40  
41  
42  
43  
44  
45  
46  
47  
48  
49  
50  
51  
52  
53  
54  
55  
56  
57  
58  
59  
60

**Table of Contents**

| <b>Content</b>                                          | <b>Page</b> |
|---------------------------------------------------------|-------------|
| <b>Appendix 1</b> Medline search details                | E3          |
| <b>Appendix 2</b> Statistical analysis plan (version 1) | E5          |

For peer review only

## Appendix 1 – Medline search details

### 1.1. PubMed Search URL

<https://pubmed.ncbi.nlm.nih.gov/?term=asthma+exacerbations&filter=pubt.randomizedcontrolledtrial&filter=dates.1993%2F1%2F1-2021%2F4%2F1&filter=humani.humans&filter=lang.english&filter=lang.french&filter=age.adolescent&filter=age.alladult&filter=age.youngadult&filter=age.adult&filter=age.middleagedage&filter=age.middleaged&filter=age.aged&filter=age.80andover&sort=date>

### 1.2. PubMed Search details:

Search: asthma exacerbations Filters: Randomized Controlled Trial, Humans, English, French, Adolescent: 13-18 years, Adult: 19+ years, Young Adult: 19-24 years, Adult: 19-44 years, Middle Aged + Aged: 45+ years, Middle Aged: 45-64 years, Aged: 65+ years, 80 and over: 80+ years, from 1993/1/1 - 2021/4/1 Sort by: Most Recent

((("asthma"[MeSH Terms] OR "asthma"[All Fields] OR "asthmas"[All Fields] OR "asthma s"[All Fields]) AND ("exacerbate"[All Fields] OR "exacerbated"[All Fields] OR "exacerbates"[All Fields] OR "exacerbating"[All Fields] OR "exacerbation"[All Fields] OR "exacerbations"[All Fields] OR "exacerbator"[All Fields] OR "exacerbators"[All Fields])) AND ((randomizedcontrolledtrial[Filter]) AND (humans[Filter]) AND (1993/1/31:2021/4/1[pdat]) AND (english[Filter] OR french[Filter]) AND (adolescent[Filter] OR alladult[Filter] OR youngadult[Filter] OR adult[Filter] OR middleagedaged[Filter] OR middleaged[Filter] OR aged[Filter] OR 80andover[Filter]))

### 1.3. Translations

1  
2  
3 asthma: "asthma"[MeSH Terms] OR "asthma"[All Fields] OR "asthmas"[All Fields] OR  
4  
5 "asthma's"[All Fields]  
6

7  
8 exacerbations: "exacerbate"[All Fields] OR "exacerbated"[All Fields] OR "exacerbates"[All  
9  
10 Fields] OR "exacerbating"[All Fields] OR "exacerbation"[All Fields] OR "exacerbations"[All  
11  
12 Fields] OR "exacerbator"[All Fields] OR "exacerbators"[All Fields]  
13  
14  
15  
16  
17  
18  
19  
20  
21  
22  
23  
24  
25  
26  
27  
28  
29  
30  
31  
32  
33  
34  
35  
36  
37  
38  
39  
40  
41  
42  
43  
44  
45  
46  
47  
48  
49  
50  
51  
52  
53  
54  
55  
56  
57  
58  
59  
60

For peer review only

1  
2  
3 **Blood eosinophils, fractional exhaled nitric oxide, and the risk of asthma**  
4 **attacks in randomised controlled trials: protocol for a systemic review and**  
5 **control arm patient-level meta-analysis for clinical prediction modelling**  
6  
7  
8  
9

10  
11  
12 **STATISTICAL ANALYSIS PLAN**  
13

14  
15 **Principal investigator**  
16

17  
18 Simon Couillard<sup>1-3</sup> MD FRCPC; [s.couillard@usherbrooke.ca](mailto:s.couillard@usherbrooke.ca)  
19  
20

21  
22 **Chief investigator**  
23

24  
25 Ian D Pavord<sup>1</sup> DM FRCP FERS FMedSci; [ian.pavord@ndm.ox.ac.uk](mailto:ian.pavord@ndm.ox.ac.uk)  
26  
27

28  
29 **Senior statistician**  
30

31  
32 Professor Ewout Steyerberg<sup>3</sup> PhD; [e.w.steyerberg@lumc.nl](mailto:e.w.steyerberg@lumc.nl)  
33  
34

35  
36 **From:** <sup>1</sup>Respiratory Medicine Unit and NIHR Oxford Respiratory BRC, Nuffield Department of  
37  
38 Medicine, University of Oxford (United-Kingdom). <sup>2</sup>Faculté de Médecine et des Sciences de la  
39  
40 Santé, Université de Sherbrooke (Canada). <sup>3</sup>Department of Biomedical Data Sciences, Leiden  
41  
42 University Medical Center, Leiden (Netherlands)  
43  
44  
45

46  
47  
48 **Address for correspondence:** Dr Simon Couillard, Respiratory Medicine Unit and Oxford  
49  
50 Respiratory NIHR BRC, Nuffield Department of Medicine, University of Oxford, Oxford OX3  
51  
52 9DU, United-Kingdom. E-mail: [S.Couillard@USherbrooke.ca](mailto:S.Couillard@USherbrooke.ca)  
53  
54  
55

## 1. Changes from previous version of SAP

| <b>Version number<br/>Issue date</b> | <b>Author of<br/>this issue</b> | <b>Significant changes from previous version<br/>together with reasons</b> |
|--------------------------------------|---------------------------------|----------------------------------------------------------------------------|
| V0.1_2021-06-02                      | Couillard                       | Not applicable as this is the 1 <sup>st</sup> issue                        |
| V0.2_2021-06-07                      | Couillard and<br>Steyerberg     | Preliminary input by study statistician                                    |
| V0.3_2021-08-25                      | Couillard                       | Minor changes                                                              |
| V0.4_2021-09-15                      | Couillard                       | Minor changes to harmonise protocol manuscript<br>draft.                   |
| V1.0_2021-10-09                      | Couillard and<br>Steyerberg     | Adjustments to harmonise with final protocol<br>manuscript                 |

## 2. Background and Objectives

### 2.1. Background and rationale

Assessment and reduction of the risk of attacks is a major goal of asthma management [1]. However, our ability to do this is limited because the independent risk associated with clinical risk factors has not been defined, some are difficult to identify and/or modify, and others can be modified independent of an effect on asthma attacks. These limitations mean that a precise estimation of the risk of asthma attacks and the likely benefit of treatment is not possible.

Recently, five analyses of clinical trials in asthma showed that fractional exhaled nitric oxide (FeNO) and the blood eosinophil count provide additive prognostic information on the occurrence of severe asthma attacks [2–6]. The effect is large, with a three-fold greater rate ratio for asthma attacks seen in patients with FeNO  $\geq 50$  ppb and blood eosinophils  $\geq 0.3 \times 10^9/L$  compared to those with a FeNO  $< 25$  ppb and blood eosinophils  $< 0.15 \times 10^9/L$  [7]. The excess risk of asthma attacks associated with the highest biomarker combination compared to the lowest was effectively removed by low-dose inhaled corticosteroids (ICS) in mild asthma [6], an increased dosage of ICS in moderate asthma [5], and biologics in severe asthma [4,8].

These findings suggest that the blood eosinophil count and FeNO could form the basis of a risk scale analogous to those that have had a large impact in cardiovascular medicine [9,10]. We have previously explored this hypothesis by developing a prototype scale (figure) which showed reasonable agreement between the observed and predicted asthma attack rates in the derivation trial-level data [7]. The prototype scale showed feasibility and potential to predict asthma attacks which can be prevented by treatment.

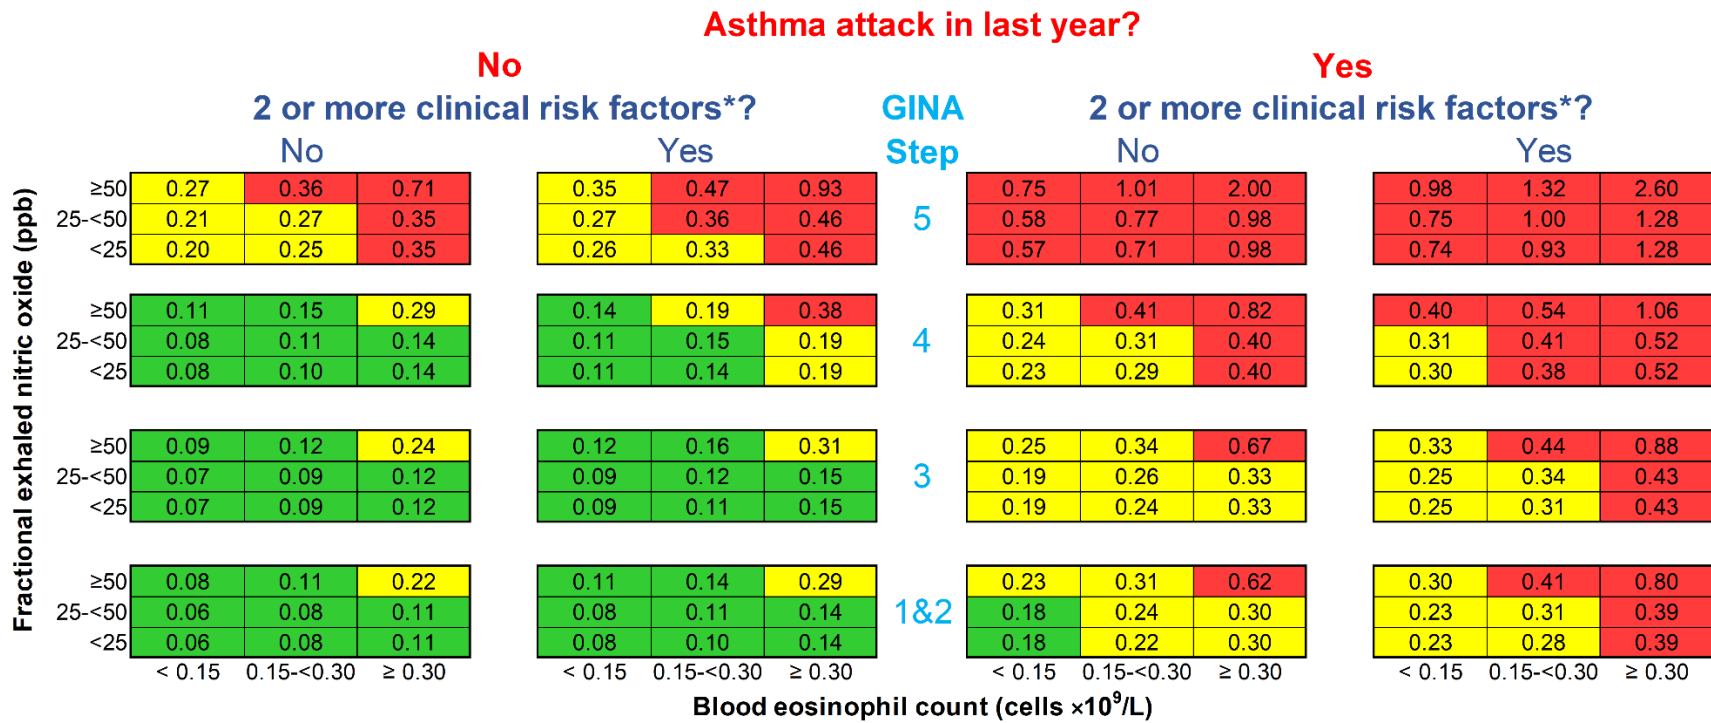

**FIGURE 1. Prototype Oxford Asthma Attack Risk ScaLE (ORACLE).**

Numbers in each cell are predicted annual asthma attack rates for patients over the age of 12 if treatment is not changed. An asthma attack is an episode of acute asthma requiring treatment with systemic steroids ≥ 3 days. Blood eosinophil count is contemporaneous or the highest result in last 12 months; fractional exhaled nitric oxide level is contemporaneous. \*Risk factors are defined by the Global Initiative for Asthma (GINA) guidelines [1]: poor symptom control (ACQ score ≥1.5), low lung function (FEV1 <80% predicted), adherence issues, reliever over-use (>200-dose salbutamol cannister/month), intubation or intensive care unit admission for asthma previously, comorbidities (one of: chronic rhinosinusitis, obesity, psychiatric disease), environmental exposures (one of: smoking, allergen, pollution). Reproduced from reference [7].

### 3. Objectives and Outcomes

#### 3.1.1. Hypothesis

We hypothesise that the blood eosinophil count and FeNO could form the basis of a robust and useful prediction model; we speculate that these two biomarkers are the airway equivalent of high blood pressure and serum cholesterol, insofar as they identify a pathological process which relates to the risk of adverse outcome (asthma attacks) that is modifiable by treatment (anti-inflammatory medication).

#### 3.1.2. Objective

To develop and validate a clinical prediction model for the absolute number of severe asthma attacks to occur in the following 12 months in relation to the peripheral blood eosinophil count, FeNO, and other risk factors assessed at baseline.

#### 3.1.3. Outcome to predict

The outcome to predict was the absolute number of severe asthma attacks to occur in the following 12 months. Severe asthma attacks are defined as acute asthma episodes requiring treatment with systemic steroids for 3 or more days and/or hospitalisation [11].



### 3. Study Details

This is the statistical analysis plan for the meta-analysis of individual participant data collected following a pre-specified systematic review protocol [12].

#### 3.1. Study population

We will search MEDLINE (PubMed interface) for randomised controlled trials (RCT) from 1 January 1993 to 1 April 2021 that investigated the effect of fixed treatment(s) regimen(s) on severe asthma attack rates over at least 6 months, also reporting a baseline value for blood eosinophils and FeNO [12].

The included RCT control arm data will be analysed to develop a risk scale to predict asthma attacks. We will focus on risk which is known to be modifiable by treatment. This modifiable excess risk relates to two surrogate measures of airway inflammation (biomarkers): the peripheral blood eosinophil count and FeNO. The contribution of other less modifiable and non-modifiable risk factors defined by the current Global Initiative for Asthma guidelines [1] will also be assessed.

#### 3.2. Study population

Following the preliminary systematic review, we identified 19 records comprising 23 independent RCTs [5,8,13–29].

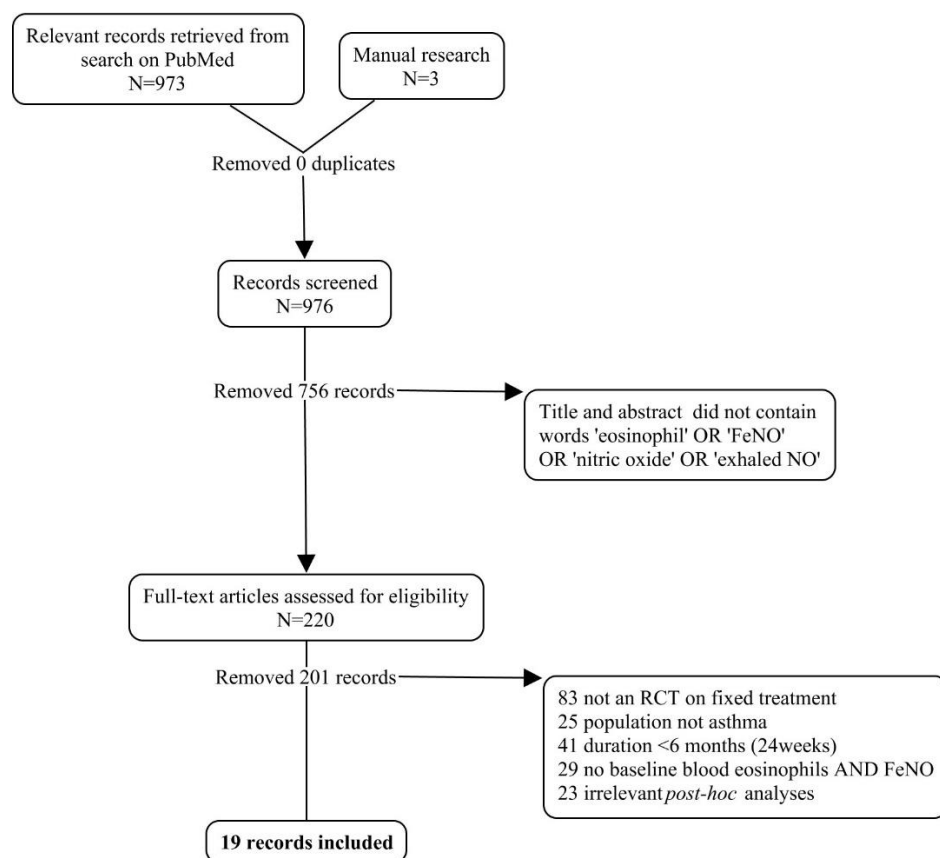

**FIGURE 2.** PRISMA flowchart of the preliminary results from the systematic review pre-specified in [12]

We will request data from the trial investigators and/or sponsors for patients diagnosed with asthma ages 12 and over that were randomised to the control arm (*i.e.* no ICS, lowest dose ICS, or placebo). The requested dataset will be functionally anonymised by design. The planned analysis pertains to the intention-to-treat population, modified to respect the inclusion criteria defined below.

### 3.2.1. Inclusion criteria

To be included, patients need to respect the following criteria:

- 1
- 2
- 3
- 4
- 5
- 6
- 7
- 8
- 9
- 10
- 11
- 12
- 13
- 14
- 15
- 16
- 17
- 18
- 19
- 20
- 21
- 22
- 23
- 24
- 25
- 26
- 27
- 28
- 29
- 30
- 31
- 32
- 33
- 34
- 35
- 36
- 37
- 38
- 39
- 40
- 41
- 42
- 43
- 44
- 45
- 46
- 47
- 48
- 49
- 50
- 51
- 52
- 53
- 54
- 55
- 56
- 57
- 58
- 59
- 60
- Asthma diagnosed according to the Global Initiative for Asthma (GINA) guideline-defined criteria (any severity)[1].
- 12 years of age or older
- Randomised to the control arm of the included study (*i.e.* placebo or no change in anti-inflammatory therapy).
- Data available for the following variables:
  - Peripheral blood eosinophil count ( $\times 10^9/L$ ) at baseline
  - FeNO (ppb) at baseline
  - Sufficient information on the patients' medication to determine the treatment step (*i.e.* disease severity)(see section 3.1.4, table 2)[1].
  - Number of severe asthma attacks in the 12 months previous to the baseline visit. Severe asthma attacks are defined as acute asthma requiring  $\geq 3$  days of systemic corticosteroid therapy and/or hospitalisation.
  - Duration of the controlled treatment period (days)
  - Number of severe asthma attacks observed during the study period.

### 3.2.2. Exclusion criteria

We will exclude patients if both baseline blood eosinophil count and baseline FeNO are missing.

We will also exclude patients with missing follow-up duration whilst on the allocated therapy, or missing number of severe asthma attacks during follow-up.

### 3.3. Cross-validation by study to assess external validity

The study population will be used for derivation and subsequent validation, stratifying by source RCT in cross-validation by study design, where each study serves as a validation set once [30].

### 3.4. Sources of data for complimentary external validation

The follow sources of data will be used for external validation:

- i) cross-validation by study is the initial external validation procedure that will be performed in the meta-analysis population;
- ii) observational prospective cohorts envisioned to contribute to later external validation are the Novelty cohort [31]; the outpatient general practice cohort derived from the Optimum Patient Care Research Database [32]; and any other RCTs or cohorts that do not share their data to a central repository.

## 4. Primary and secondary variables

### 4.1. General definitions

#### 4.1.1. Definition of baseline

In general, the last non-missing measurement on or prior to the date of randomisation will serve as the baseline measurement for predictors.

#### 4.1.2. Duration of the controlled treatment period

The controlled treatment period for the assessment of severe asthma attacks starts at the date of randomisation and ends at the minimum (date of last dose of placebo + appropriate wash-out period as per source RCT protocol, date of death, date of study withdrawal).

#### 4.1.3. Concomitant medication

Medications taken by the subject at any time during the controlled treatment period will be used to define the treatment step. Concomitant medications during the controlled treatment period which are recorded are defined in section 2.3 (study variables).

#### 4.1.4. Treatment step

A modified version of the 2017 and 2021 GINA guidelines definitions will be used to determine treatment step.

**TABLE 2**  
**Modified treatment step definitions for this study**

| Treatment step | Definition                                                                                                                                                                      |
|----------------|---------------------------------------------------------------------------------------------------------------------------------------------------------------------------------|
| <b>Step 1</b>  | As-needed short-acting beta2-agonist                                                                                                                                            |
| <b>Step 2</b>  | Daily low dose ICS <u>or</u><br>As-needed low dose inhaled corticosteroid (ICS)-formoterol<br>Daily leukotriene receptor agonist                                                |
| <b>Step 3</b>  | Daily low dose ICS + an additional controller therapy                                                                                                                           |
| <b>Step 4</b>  | Any medium dose ICS-containing regimen                                                                                                                                          |
| <b>Step 5</b>  | Any high dose ICS-containing regimen <u>or</u><br>Any maintenance systemic corticosteroid use (defined as use of systemic corticosteroids for $\geq 50\%$ of the previous year) |

Modified from GINA 2017 and 2021 [1] guidelines.

#### 4.1.5. Calculation of inhaled corticosteroid (ICS) dosing

ICS-dose strength will be determined using the following table, retained from the 2021 GINA guidelines:

**TABLE 3**

**Low, medium and high daily metered doses of inhaled corticosteroids in adults and adolescents (12 years and older)**

| Inhaled corticosteroid                                    | Total daily ICS dose (mcg) |           |       |
|-----------------------------------------------------------|----------------------------|-----------|-------|
|                                                           | Low                        | Medium    | High  |
| Beclomethasone dipropionate CFC-propellant MDI            | 200-500                    | >500-1000 | >1000 |
| Beclomethasone dipropionate extrafine particle MDI or DPI | 100-200                    | >200-400  | >400  |
| Budesonide                                                | 200-400                    | >400-800  | >800  |
| Fluticasone dipropionate                                  | 100-250                    | >250-500  | >500  |
| Fluticasone furoate                                       | 100                        | 100       | 200   |
| Ciclesonide                                               | 80-160                     | >160-320  | >320  |
| Mometasone furoate                                        | 200-400                    | 200-400   | >400  |

Adapted from [1]. CFC, chlorofluorocarbon; DPI, dry powder inhaler; MDI, multidose inhaler.

The following ICS dose equivalence table will be used to characterise patients' concomitant ICS use:

**TABLE 4**  
**Equivalent doses between inhaled corticosteroids**

| Inhaled corticosteroid type                    | Equivalent dose |
|------------------------------------------------|-----------------|
| Beclomethasone dipropionate CFC-propellant MDI | 1 mcg           |
| Beclomethasone dipropionate HFA or DPI         | 2.5 mcg         |
| Budesonide                                     | 1.25 mcg        |
| Fluticasone dipropionate                       | 2.5 mcg         |
| Fluticasone furoate                            | 5 mcg           |
| Ciclesonide                                    | 3.125 mcg       |
| Mometasone furoate                             | 2.27 mcg        |
| Triamcinolone acetonide                        | 0.5 mcg         |

Adapted from [1].

#### 4.2. Primary variable and study endpoint

The effect to measure and predict is number of severe asthma attacks (defined as acute asthma requiring  $\geq 3$  days of systemic corticosteroids and/or hospitalisation)[11] to occur in the following 12 months in relation to the peripheral blood eosinophil count, FeNO, and other prognostic actors assessed at baseline.

The start of an exacerbation is defined as the start date of systemic corticosteroids, emergency room (ER), urgent care (UC) visits, or hospital admissions due to asthma, whichever occurs earlier.

The end date is defined as the last day of systemic corticosteroids or ER/UC/hospital discharge, whichever occurs later.

Two or more exacerbations with the same start date and end date will be counted as one exacerbation for the purposes of calculating the number and duration of exacerbations for a subject.

In the case that one or more exacerbations are recorded as starting or ending during another exacerbation, these will be counted as one exacerbation, using the earliest exacerbation start date and the latest exacerbation stop date to calculate duration.

1  
2  
3 Additional systemic corticosteroid treatments, ER visit or UC visit requiring use of systemic  
4 corticosteroids, or hospital admission will not be regarded as a new exacerbation. To be counted  
5 as a new exacerbation it must be preceded by at least 7 days in which neither criterion is fulfilled.  
6  
7 If the end date of the first exacerbation and the start date of the second exacerbation are less than  
8  
9 7 days apart, then these will be counted as one exacerbation.  
10  
11  
12  
13  
14

15 The number of days the subject experiences a protocol defined exacerbation, including the  
16 subsequent 7 days (when a further exacerbation would not be considered as a second exacerbation),  
17 will be subtracted from the time at risk defined above for the primary analysis. For example, if a  
18 subject has a single exacerbation which lasts 4 days then  $7 + 4 = 11$  days will be subtracted from  
19 the time at risk.  
20  
21  
22  
23  
24  
25  
26  
27

#### 28 **4.3. Subgrouping for biomarker-stratified clinical prediction modelling**

##### 29 **3.1.1. Biomarker-stratified subgroups**

30  
31  
32 The main multivariable prognostic modelling analysis will use continuous values of the blood  
33 eosinophil count, FeNO, and other clinical risk factors (table 1). If relevant, combined effects will  
34 be summarised in a 3×3 matrix stratified by the blood eosinophil count (<0.15, 0.15-<0.30,  
35  $\geq 0.30 \times 10^9$  cells/L) and FeNO (<25, 25-<50,  $\geq 50$  ppb), and plotted in interaction plots with 95%  
36 confidence intervals (CI). Heterogeneity in estimates between studies will be quantified by  $I^2$   
37 statistics. Additional analyses will consider continuous versions of predictors with restricted cubic  
38 splines [33].  
39  
40  
41  
42  
43  
44  
45  
46  
47  
48  
49  
50  
51  
52  
53  
54  
55  
56  
57  
58  
59  
60



### 3.1.2. Comparative subgroup rate ratio analysis

If relevant following analyses on continuous data, crude and adjusted rate ratios of the annualised severe exacerbation rate for each of the 9 categories (3×3 matrix according to the blood eosinophil count (<0.15, 0.15-<0.30, ≥0.30×10<sup>9</sup> cells/L) and FeNO (<25, 25-<50, ≥50 ppb) will be determined. Rate ratios for each subgroup are calculated as the weighted annualised exacerbation rate for the selected subgroup divided by the mean for the remainder of the matrix, weighted by patient-years of data. The adjusted rate ratios will account for asthma severity (treatment step), history of asthma attacks (≤1 or >1 in previous 12 months); as well as age, sex, and source RCT to control for unsuspected confounding factors relating to the three latter variables.

The potentially relevant clinical risk factors for asthma attacks listed in section 3.4 will be assessed using a bootstrapped backward stepwise selection procedure during regression analysis in a random effects model. Key predictors are: blood eosinophils, FeNO, treatment step and the past history of exacerbations (0 or ≥1 in previous 12 months).

#### **4.4. Potential clinical predictors**

The following variables will be assessed as potential clinical predictors, in addition to the forced variables (treatment step, past history of exacerbations (<1 or ≥1 in previous 12 months), age, sex, and source RCT).

- Ethnicity: categorical
- Comorbidities: categorical (list of comorbidities following the Charlson comorbidity index [34])
- Socioeconomic status (anonymised and operationalised depending dataset)

- 1
- 2
- 3 • Body mass index: continuous
- 4
- 5
- 6 • Postbronchodilator (BD) FEV1, as % predicted (or preBD if no postBD): continuous
- 7
- 8 • % change in FEV1 post-bronchodilator (calculated as (FEV1 post BD minus FEV1 preBD
- 9 in litres) divided by FEV1 preBD in litres: continuous
- 10
- 11
- 12 • FEV1/FVC ratio, calculated as FEV1 postBD in litres divided by FVC postBD in litres (or
- 13 using preBD values if no postBD)
- 14
- 15
- 16 • Smoking status (current, ex-, passive, never-smokers): categorical
- 17
- 18
- 19 • Airborne allergies reported (yes/no): categorical
- 20
- 21
- 22 • Allergy testing positive (yes/no): categorical
- 23
- 24 • Chronic rhinosinusitis (yes/no): categorical
- 25
- 26 • Nasal polyposis (yes/no): categorical
- 27
- 28
- 29 • Adherent to medications (operationalised definition depending on the dataset): continuous
- 30 (or categorical if not feasible to operationalise in a continuous variable)
- 31
- 32
- 33 • Inhalers prescribed:
- 34
  - 35 - ICS: categorical (yes/no)
  - 36
  - 37 - ICS daily equivalent dose (continuous)
  - 38
  - 39 - Short-acting beta2-agonist (yes/no) and number of actuations used per month
  - 40 (continuous)
  - 41
  - 42
  - 43 - Long-acting beta2-agonist (yes/no)
  - 44
  - 45 - Long-acting muscarinic antagonist (yes/no)
  - 46
  - 47
  - 48 - Leukotriene receptor antagonist (yes/no)
  - 49
  - 50
  - 51 - Theophylline or aminophylline (yes/no)
  - 52
  - 53
- 54 • On maintenance oral corticosteroids (OCS) (yes/no): categorical
- 55
- 56
- 57
- 58
- 59
- 60

- Severe exacerbation in the preceding 12 months (defined as an acute event requiring  $\geq 3$  days of systemic corticosteroids and/or hospitalisation): yes/no category and continuously by number of episodes in preceding 12 months.
- Previous intensive care or intubation for airways disease (yes/no): categorical
- Asthma control questionnaire (ACQ) score (or asthma control test (ACT) or any other standardised symptom score test if ACQ not available): continuous (ACQ or ACT) and categorical (according to established cut points for uncontrolled disease:  $ACQ \geq 1.5$  or  $ACT < 20$ )

#### 4.5. Missing values

Missing values will be assessed for their mechanism (missing completely at random, missing at random or missing not at random) by the main investigators in conjunction with the study statistician. When data is missing at random, 10 complete datasets will be generated by multiple imputation.

#### 4.6. Heterogeneity assessment

The variability between studies will be quantified in a random effect analysis and quantified with  $I^2$  statistics.

#### 4.7. Optimism correction

The adjusted biomarker-stratified and clinical predictors' incidence rate ratios will be corrected for overoptimistic predictions. Penalty terms will be used and/or linear shrinkage factors, as estimated from cross-validation and/or bootstrap resampling procedures as implemented in `rms` and `glmnet` libraries for R.

#### 4.8. Statistical software and confidence intervals

Data analysis will be conducted in collaboration with the study statistician (ES) using R software.

Estimates will be accompanied by two-sided 95% CI.

#### 4. Clinical prediction model presentation formats

A summary prognostic equation will be produced, assessed by the principal investigators, and adapted to previously reported GINA treatment step reference attack rates [35] to allow for a user-friendly prediction summary chart similar to the reported prototype (figure 1).

#### 5. Performance evaluation

##### 5.1. General performance measures

The resultant prognostic equation and chart will be assessed in the validation cohorts defined in section 2.4. Discrimination will be evaluated. Calibration plots will be created with focus on centiles of risk (10<sup>th</sup>, 50<sup>th</sup> and 90<sup>th</sup> of the distribution of predicted attack rates), and summary measures of the plot will be computed. Sensitivity, specificity and receiving operating characteristic (ROC) analyses of the model will be assessed. Reliability will be evaluated using the intraclass correlation coefficient (two-ways mixed model for absolute agreement, single measures, with 95% CI). Calibration will be assessed graphically, with characterization of calibration in the large by a calibration intercept, and overall prognostic strength by the calibration slope. Discrimination will be assessed by the c-statistic, and clinical utility by Net Benefit plotted in decision curves.

## 5.2. Subgroup performance measures

The performance of the resultant chart will be evaluated across the selected clinical predictors (composite biomarker category; treatment step; asthma attack history; retained clinical risk factors) as stated in section 4.1 for each subsection of the chart in each of the validation cohorts. In effect, assuming the final chart resembles the prototype (figure 1), this will result in performance assessment for each of the 16 subsections and/or each of the 144 squares, depending on the validation cohort size.

## 6. Study power

Considering a mean annualised severe asthma attack of 0.6 in the entire study population and a conservative estimate that the derivation cohort will comprise 50% of the individual patient data reported in our prototype scale ( $0.5 \times 3051 = 1525$ ) [7], there should be approximately 915 events to derive a clinical prediction model. With a target maximum of 10 prediction variables, the event per variable (EPV) number is 92; well over the recommended 10-20 EPV [36]. However, we concede that the EPV will be considerably lower for mild asthma populations, where trials identified less than 100 severe asthma attack events in their control arms [21,23]. Conversely, the study will be more than adequately powered for moderate-to-severe asthma.

## Strengths and limitations of our approach

### 6.1. Strengths

- The study design and its objective – to derive and validate a clinical prediction tool based on biomarkers of type-2 inflammation – fulfils an unmet clinical need. We speculate that a risk stratification strategy centred on modifiable type-2 airway inflammation rather than

1  
2  
3 difficult-to-modify clinical characteristics would facilitate better treatment decisions by  
4 providing a framework for a preventive, treatable trait-based management.  
5  
6

- 7
- 8 • A proof-of-concept evaluation of this project has already been completed and shows  
9 feasibility and potential to predict asthma attacks which can be prevented by treatment [7]  
10 (Figure 1).  
11
  - 12 • Study selection bias is reduced via the pre-specified systematic review approach.  
13
  - 14 • Adequate study power. As stated above, with an estimated overall attack rate equal to that  
15 reported in the prototype scale (0.6 attacks per year) and a conservative estimate of  
16 individual participant data provided (50% of the prototype study population), there should  
17 ample events observed for model derivation validation.  
18
  - 19 • Detection bias of the outcome of interest (severe asthma attacks) is minimised by its  
20 rigorous monitoring and documentation in the context of RCTs.  
21
  - 22 • In addition to the cross-validation by study [30], we plan to validate the resultant chart in  
23 different validation cohorts: a part of the base RCT population, Novelty [31] and the  
24 Optimum Patient Care Research Database [32].  
25  
26  
27  
28  
29  
30  
31  
32  
33  
34  
35  
36  
37  
38  
39  
40  
41  
42  
43  
44  
45  
46  
47  
48  
49  
50  
51  
52  
53  
54  
55  
56  
57  
58  
59  
60

## 6.2. Limitations

- Many of the included RCT study populations were positively selected to be at high risk of asthma attacks, and trials enrolling mild asthmatics have reported low asthma attack rates ; this may result in the model overestimating the risk of events and underperforming in mild asthma.
- The assumption at the basis of our approach is that the type-2 biomarkers blood eosinophils and FeNO carry additive and independent predictive value for the risk of asthma attacks at all disease severities. It is unclear if FeNO exerts a similar predictive value in mild asthma [6]. This modification of risk will be addressed by statistical interaction terms.
- There is no clear reference for treatment step asthma attack rates adapted for the most recent GINA 2021 guidelines; it is possible we will need to model around the previously reported GINA 2017 classification reference asthma attack rates [35].
- We suspect that some of the important clinical risk factors emphasised by current management guidelines [1] will not be present in the RCT population (*e.g.* nonadherence is usually an exclusion criteria; salbutamol over-use is not always reported).
- Controlled trial populations in asthma are notorious for a strong placebo effect and do not necessarily reflect clinical practice, where treatment fluctuates according to the perceived or observed risk of asthma attacks; this may impact external validation in observational cohorts.

**REFERENCES**

- 1 Global Initiative for Asthma (GINA). Global Strategy for Asthma Management and Prevention (2021 update). 2021. <https://ginasthma.org/>
- 2 Busse WW, Wenzel SE, Casale TB, *et al.* Baseline FeNO as a Prognostic Biomarker for Subsequent Severe Asthma Exacerbations in Patients With Uncontrolled, Moderate-to-Severe Asthma Receiving Placebo in the LIBERTY ASTHMA QUEST Study: A Post Hoc Analysis. *Lancet Respir Med* 2021;**0**. doi:10.1016/S2213-2600(21)00124-7
- 3 Kraft M, Brusselle G, Mark FitzGerald J, *et al.* Patient characteristics, biomarkers, and exacerbation risk in severe, uncontrolled asthma. *Eur Respir J* Published Online First: 10 June 2021. doi:10.1183/13993003.00413-2021
- 4 Shrimanker R, Keene O, Hynes G, *et al.* Prognostic and predictive value of blood eosinophil count, fractional exhaled nitric oxide, and their combination in severe asthma: A post hoc analysis. *Am J Respir Crit Care Med* 2019;**200**:1308–12. doi:10.1164/rccm.201903-0599LE
- 5 Lee LA, Bailes Z, Barnes N, *et al.* Efficacy and safety of once-daily single-inhaler triple therapy (FF/UMEC/VI) versus FF/VI in patients with inadequately controlled asthma (CAPTAIN): a double-blind, randomised, phase 3A trial. *Lancet Respir Med* 2021;**9**:69–84. doi:10.1016/S2213-2600(20)30389-1
- 6 Pavord ID, Holliday M, Reddel HK, *et al.* Predictive value of blood eosinophils and exhaled nitric oxide in adults with mild asthma: a prespecified subgroup analysis of an open-label, parallel-group, randomised controlled trial. *Lancet Respir Med* 2020;**8**:671–80.



- 1  
2  
3 doi:10.1016/S2213-2600(20)30053-9  
4  
5  
6  
7 7 Couillard S, Laugerud A, Jabeen M, *et al.* Derivation of a prototype asthma attack risk scale  
8 centred on blood eosinophils and exhaled nitric oxide. *Thorax* Published Online First: 2021.  
9  
10 doi:10.1136/thoraxjnl-2021-217325  
11  
12  
13  
14 8 Menzies-Gow A, Corren J, Bourdin A, *et al.* Tezepelumab in Adults and Adolescents with  
15 Severe, Uncontrolled Asthma. *N Engl J Med* 2021;**384**:1800–9.  
16  
17 doi:10.1056/NEJMoa2034975  
18  
19  
20  
21  
22 9 Conroy RM, Pyörälä K, Fitzgerald AP, *et al.* Estimation of ten-year risk of fatal  
23 cardiovascular disease in Europe: The SCORE project. *Eur Heart J* 2003;**24**:987–1003.  
24  
25 doi:10.1016/S0195-668X(03)00114-3  
26  
27  
28  
29  
30 10 Jackson R, Barham P, Bills J, *et al.* Management of raised blood pressure in New Zealand:  
31 A discussion document. *Br. Med. J.* 1993;**307**:107–10. doi:10.1136/bmj.307.6896.107  
32  
33  
34  
35  
36 11 Reddel HK, Taylor DR, Bateman ED, *et al.* An official American Thoracic  
37 Society/European Respiratory Society statement: Asthma control and exacerbations -  
38 Standardizing endpoints for clinical asthma trials and clinical practice. *Am J Respir Crit*  
39 *Care Med* 2009;**180**:59–99. doi:10.1164/rccm.200801-060ST  
40  
41  
42  
43  
44  
45  
46 12 Couillard S, Pavord I. Exhaled nitric oxide, blood eosinophils and the risk of asthma attacks  
47 in randomised clinical trials: a systemic review and meta-analysis of individual participant  
48 data. 2021.  
49  
50  
51  
52  
53 [https://www.crd.york.ac.uk/prospero/display\\_record.php?ID=CRD42021245337](https://www.crd.york.ac.uk/prospero/display_record.php?ID=CRD42021245337)  
54  
55  
56  
57  
58  
59  
60

- 1  
2  
3 13 Hanania NA, Korenblat P, Chapman KR, *et al.* Efficacy and safety of lebrikizumab in  
4 patients with uncontrolled asthma (LAVOLTA I and LAVOLTA II): replicate, phase 3,  
5 randomised, double-blind, placebo-controlled trials. *Lancet Respir Med* 2016;**4**:781–96.  
6 doi:10.1016/S2213-2600(16)30265-X  
7  
8  
9  
10  
11  
12  
13 14 Castro M, Wenzel SE, Bleecker ER, *et al.* Benralizumab, an anti-interleukin 5 receptor  $\alpha$   
14 monoclonal antibody, versus placebo for uncontrolled eosinophilic asthma: A phase 2b  
15 randomised dose-ranging study. *Lancet Respir Med* 2014;**2**:879–90. doi:10.1016/S2213-  
16 2600(14)70201-2  
17  
18  
19  
20  
21  
22  
23 15 Hanania NA, Wenzel S, Roseñ K, *et al.* Exploring the effects of omalizumab in allergic  
24 asthma: An analysis of biomarkers in the EXTRA study. *Am J Respir Crit Care Med*  
25 2013;**187**:804–11. doi:10.1164/rccm.201208-1414OC  
26  
27  
28  
29  
30  
31 16 Brusselle GG, VanderStichele C, Jordens P, *et al.* Azithromycin for prevention of  
32 exacerbations in severe asthma (AZISAST): A multicentre randomised double-blind  
33 placebo-controlled trial. *Thorax* 2013;**68**:322–9. doi:10.1136/thoraxjnl-2012-202698  
34  
35  
36  
37  
38  
39 17 Pavord ID, Korn S, Howarth P, *et al.* Mepolizumab for severe eosinophilic asthma  
40 (DREAM): A multicentre, double-blind, placebo-controlled trial. *Lancet* 2012;**380**:651–9.  
41 doi:10.1016/S0140-6736(12)60988-X  
42  
43  
44  
45  
46  
47 18 Hanania NA, Noonan M, Corren J, *et al.* Lebrikizumab in moderate-to-severe asthma:  
48 Pooled data from two randomised placebo-controlled studies. *Thorax* 2015;**70**:748–56.  
49 doi:10.1136/thoraxjnl-2014-206719  
50  
51  
52  
53  
54  
55 19 Sorkness CA, Lemanske RF, Mauger DT, *et al.* Long-term comparison of 3 controller  
56  
57  
58  
59  
60

- 1  
2  
3 regimens for mild-moderate persistent childhood asthma: The Pediatric Asthma Controller  
4 Trial. *J Allergy Clin Immunol* 2007;**119**:64–72. doi:10.1016/j.jaci.2006.09.042  
5  
6  
7  
8  
9 20 Corren J, Lemanske RF, Hanania NA, *et al.* Lebrikizumab treatment in adults with asthma.  
10 *N Engl J Med* 2011;**365**:1088–98. doi:10.1056/NEJMoa1106469  
11  
12  
13  
14 21 Hardy J, Baggott C, Fingleton J, *et al.* Budesonide-formoterol reliever therapy versus  
15 maintenance budesonide plus terbutaline reliever therapy in adults with mild to moderate  
16 asthma (PRACTICAL): a 52-week, open-label, multicentre, superiority, randomised  
17 controlled trial. *Lancet (London, England)* 2019;**394**:919–28. doi:10.1016/S0140-  
18 6736(19)31948-8  
19  
20  
21  
22  
23  
24  
25  
26  
27 22 Brightling CE, Gaga M, Inoue H, *et al.* Effectiveness of fevipiprant in reducing  
28 exacerbations in patients with severe asthma (LUSTER-1 and LUSTER-2): two phase 3  
29 randomised controlled trials. *Lancet Respir Med* 2021;**9**:43–56. doi:10.1016/S2213-  
30 2600(20)30412-4  
31  
32  
33  
34  
35  
36  
37 23 Beasley R, Holliday M, Reddel HK, *et al.* Controlled trial of budesonide-formoterol as  
38 needed for mild asthma. *N Engl J Med* 2019;**380**:2020–30. doi:10.1056/NEJMoa1901963  
39  
40  
41  
42  
43 24 Panettieri RA, Sjöbring U, Péterffy AM, *et al.* Tralokinumab for severe, uncontrolled  
44 asthma (STRATOS 1 and STRATOS 2): two randomised, double-blind, placebo-controlled,  
45 phase 3 clinical trials. *Lancet Respir Med* 2018;**6**:511–25. doi:10.1016/S2213-  
46 2600(18)30184-X  
47  
48  
49  
50  
51  
52  
53 25 Castro M, Corren J, Pavord ID, *et al.* Dupilumab Efficacy and Safety in Moderate-to-Severe  
54 Uncontrolled Asthma. *N Engl J Med* 2018;**378**:2486–96. doi:10.1056/NEJMoa1804092  
55  
56  
57  
58  
59  
60

- 1  
2  
3 26 Corren J, Parnes JR, Wang L, *et al.* Tezepelumab in Adults with Uncontrolled Asthma. *N*  
4  
5 *Engl J Med* 2017;**377**:936–46. doi:10.1056/NEJMoal704064  
6  
7  
8  
9 27 Wenzel S, Castro M, Corren J, *et al.* Dupilumab efficacy and safety in adults with  
10  
11 uncontrolled persistent asthma despite use of medium-to-high-dose inhaled corticosteroids  
12  
13 plus a long-acting  $\beta$ 2 agonist: a randomised double-blind placebo-controlled pivotal phase  
14  
15 2b dose-ranging trial. *Lancet* 2016;**388**:31–44. doi:10.1016/S0140-6736(16)30307-5  
16  
17  
18  
19 28 Park HS, Kim MK, Imai N, *et al.* A phase 2a study of benralizumab for patients with  
20  
21 eosinophilic asthma in South Korea and Japan. *Int Arch Allergy Immunol* 2016;**169**:135–  
22  
23 45. doi:10.1159/000444799  
24  
25  
26  
27 29 Harris JM, Maciucă R, Bradley MS, *et al.* A randomized trial of the efficacy and safety of  
28  
29 quilizumab in adults with inadequately controlled allergic asthma. *Respir Res* 2016;**17**:1–  
30  
31 11. doi:10.1186/s12931-016-0347-2  
32  
33  
34  
35 30 Steyerberg EW, Harrell FE. Prediction models need appropriate internal, internal-external,  
36  
37 and external validation. *J. Clin. Epidemiol.* 2016;**69**:245–7.  
38  
39 doi:10.1016/j.jclinepi.2015.04.005  
40  
41  
42  
43 31 Reddel HK, Gerhardsson de Verdier M, Agustí A, *et al.* Prospective observational study in  
44  
45 patients with obstructive lung disease: NOVELTY design. *ERJ Open Res* 2019;**5**:00036–  
46  
47 2018. doi:10.1183/23120541.00036-2018  
48  
49  
50  
51 32 Price DB, Bosnic-Anticevich S, Pavord ID, *et al.* Association of elevated fractional exhaled  
52  
53 nitric oxide concentration and blood eosinophil count with severe asthma exacerbations.  
54  
55 *Clin Transl Allergy* 2019;**9**:41. doi:10.1186/s13601-019-0282-7  
56  
57  
58  
59

- 1  
2  
3 33 Harrell FE. *Regression Modeling Strategies With Applications to Linear Models, Logistic*  
4 *and Ordinal Regression, and Survival Analysis*. Springer International Publishing 2015.  
5  
6 doi:10.1007/978-3-319-19425-7  
7  
8  
9  
10  
11 34 Quan H, Li B, Couris CM, *et al*. Updating and validating the charlson comorbidity index  
12 and score for risk adjustment in hospital discharge abstracts using data from 6 countries.  
13 *Am J Epidemiol* 2011;**173**:676–82. doi:10.1093/aje/kwq433  
14  
15  
16  
17  
18 35 Suruki RY, Daugherty JB, Boudiaf N, *et al*. The frequency of asthma exacerbations and  
19 healthcare utilization in patients with asthma from the UK and USA. *BMC Pulm Med*  
20 2017;**17**. doi:10.1186/s12890-017-0409-3  
21  
22  
23  
24  
25  
26 36 Steyerberg EW. *Clinical Prediction Models*. Cham: : Springer International Publishing  
27 2019. doi:10.1007/978-3-030-16399-0  
28  
29  
30  
31  
32  
33  
34  
35  
36  
37  
38  
39  
40  
41  
42  
43  
44  
45  
46  
47  
48  
49  
50  
51  
52  
53  
54  
55  
56  
57  
58  
59  
60

**PRISMA-P (Preferred Reporting Items for Systematic review and Meta-Analysis Protocols) 2015 checklist: recommended items to address in a systematic review protocol\***

| Section and topic                 | Item No | Checklist item                                                                                                                                                                                                                | Manuscript page (of 29 page Word document) |
|-----------------------------------|---------|-------------------------------------------------------------------------------------------------------------------------------------------------------------------------------------------------------------------------------|--------------------------------------------|
| <b>ADMINISTRATIVE INFORMATION</b> |         |                                                                                                                                                                                                                               |                                            |
| Title:                            |         |                                                                                                                                                                                                                               |                                            |
| Identification                    | 1a      | Identify the report as a protocol of a systematic review                                                                                                                                                                      | p.1                                        |
| Update                            | 1b      | If the protocol is for an update of a previous systematic review, identify as such                                                                                                                                            | p.1                                        |
| Registration                      | 2       | If registered, provide the name of the registry (such as PROSPERO) and registration number                                                                                                                                    | p.1 + <b>p.5</b>                           |
| Authors:                          |         |                                                                                                                                                                                                                               |                                            |
| Contact                           | 3a      | Provide name, institutional affiliation, e-mail address of all protocol authors; provide physical mailing address of corresponding author                                                                                     | p.1                                        |
| Contributions                     | 3b      | Describe contributions of protocol authors and identify the guarantor of the review                                                                                                                                           | p.2                                        |
| Amendments                        | 4       | If the protocol represents an amendment of a previously completed or published protocol, identify as such and list changes; otherwise, state plan for documenting important protocol amendments                               | N/A                                        |
| Support:                          |         |                                                                                                                                                                                                                               |                                            |
| Sources                           | 5a      | Indicate sources of financial or other support for the review                                                                                                                                                                 | p.2                                        |
| Sponsor                           | 5b      | Provide name for the review funder and/or sponsor                                                                                                                                                                             | p.2                                        |
| Role of sponsor or funder         | 5c      | Describe roles of funder(s), sponsor(s), and/or institution(s), if any, in developing the protocol                                                                                                                            | p.2                                        |
| <b>INTRODUCTION</b>               |         |                                                                                                                                                                                                                               |                                            |
| Rationale                         | 6       | Describe the rationale for the review in the context of what is already known                                                                                                                                                 | p.7                                        |
| Objectives                        | 7       | Provide an explicit statement of the question(s) the review will address with reference to participants, interventions, comparators, and outcomes (PICO)                                                                      | p.8                                        |
| <b>METHODS</b>                    |         |                                                                                                                                                                                                                               |                                            |
| Eligibility criteria              | 8       | Specify the study characteristics (such as PICO, study design, setting, time frame) and report characteristics (such as years considered, language, publication status) to be used as criteria for eligibility for the review | p.10-12                                    |
| Information sources               | 9       | Describe all intended information sources (such as electronic databases, contact with study authors, trial registers or other grey literature sources) with planned dates of coverage                                         | p.11-12                                    |
| Search strategy                   | 10      | Present draft of search strategy to be used for at least one electronic database, including planned limits, such that it could be repeated                                                                                    | p.11-12 + Appendix 1                       |

|                                    |     |                                                                                                                                                                                                                                                     |                      |
|------------------------------------|-----|-----------------------------------------------------------------------------------------------------------------------------------------------------------------------------------------------------------------------------------------------------|----------------------|
| Study records:                     |     |                                                                                                                                                                                                                                                     |                      |
| Data management                    | 11a | Describe the mechanism(s) that will be used to manage records and data throughout the review                                                                                                                                                        | p.11-12              |
| Selection process                  | 11b | State the process that will be used for selecting studies (such as two independent reviewers) through each phase of the review (that is, screening, eligibility and inclusion in meta-analysis)                                                     | p.11-12              |
| Data collection process            | 11c | Describe planned method of extracting data from reports (such as piloting forms, done independently, in duplicate), any processes for obtaining and confirming data from investigators                                                              | p.12                 |
| Data items                         | 12  | List and define all variables for which data will be sought (such as PICO items, funding sources), any pre-planned data assumptions and simplifications                                                                                             | p.12                 |
| Outcomes and prioritization        | 13  | List and define all outcomes for which data will be sought, including prioritization of main and additional outcomes, with rationale                                                                                                                | p.11 + p.12          |
| Risk of bias in individual studies | 14  | Describe anticipated methods for assessing risk of bias of individual studies, including whether this will be done at the outcome or study level, or both; state how this information will be used in data synthesis                                | p.13                 |
| Data synthesis                     | 15a | Describe criteria under which study data will be quantitatively synthesised                                                                                                                                                                         | p.13-15 + Appendix 2 |
|                                    | 15b | If data are appropriate for quantitative synthesis, describe planned summary measures, methods of handling data and methods of combining data from studies, including any planned exploration of consistency (such as I <sup>2</sup> , Kendall's τ) | p.13-15 + Appendix 2 |
|                                    | 15c | Describe any proposed additional analyses (such as sensitivity or subgroup analyses, meta-regression)                                                                                                                                               | p.13-15 + Appendix 2 |
|                                    | 15d | If quantitative synthesis is not appropriate, describe the type of summary planned                                                                                                                                                                  | N/A                  |
| Meta-bias(es)                      | 16  | Specify any planned assessment of meta-bias(es) (such as publication bias across studies, selective reporting within studies)                                                                                                                       | N/A                  |
| Confidence in cumulative evidence  | 17  | Describe how the strength of the body of evidence will be assessed (such as GRADE)                                                                                                                                                                  | N/A                  |

**\* It is strongly recommended that this checklist be read in conjunction with the PRISMA-P Explanation and Elaboration (cite when available) for important clarification on the items. Amendments to a review protocol should be tracked and dated. The copyright for PRISMA-P (including checklist) is held by the PRISMA-P Group and is distributed under a Creative Commons Attribution Licence 4.0.**

*From: Shamseer L, Moher D, Clarke M, Ghersi D, Liberati A, Petticrew M, Shekelle P, Stewart L, PRISMA-P Group. Preferred reporting items for systematic review and meta-analysis protocols (PRISMA-P) 2015: elaboration and explanation. BMJ. 2015 Jan 2;349(jan02 1):g7647.*

# BMJ Open

**Blood eosinophils, fractional exhaled nitric oxide, and the risk of asthma attacks in randomised controlled trials: protocol for a systemic review and control arm patient-level meta-analysis for clinical prediction modelling**

|                                 |                                                                                                                                                                                                                                                                                                                                                          |
|---------------------------------|----------------------------------------------------------------------------------------------------------------------------------------------------------------------------------------------------------------------------------------------------------------------------------------------------------------------------------------------------------|
| Journal:                        | <i>BMJ Open</i>                                                                                                                                                                                                                                                                                                                                          |
| Manuscript ID                   | bmjopen-2021-058215.R1                                                                                                                                                                                                                                                                                                                                   |
| Article Type:                   | Protocol                                                                                                                                                                                                                                                                                                                                                 |
| Date Submitted by the Author:   | 01-Feb-2022                                                                                                                                                                                                                                                                                                                                              |
| Complete List of Authors:       | Couillard, Simon; University of Oxford, Oxford Respiratory NIHR BRC, Nuffield Department of Medicine<br>Steyerberg, Ewout; Leiden University Medical Center, Biomedical Data Sciences<br>Beasley, Richard; Medical Research Institute of New Zealand<br>Pavord, Ian ; University of Oxford, Oxford Respiratory NIHR BRC, Nuffield Department of Medicine |
| <b>Primary Subject Heading</b>: | Respiratory medicine                                                                                                                                                                                                                                                                                                                                     |
| Secondary Subject Heading:      | Immunology (including allergy), Epidemiology, Diagnostics, General practice / Family practice                                                                                                                                                                                                                                                            |
| Keywords:                       | Asthma < THORACIC MEDICINE, Immunology < THORACIC MEDICINE, Epidemiology < THORACIC MEDICINE, Thoracic medicine < INTERNAL MEDICINE, PREVENTIVE MEDICINE                                                                                                                                                                                                 |
|                                 |                                                                                                                                                                                                                                                                                                                                                          |

SCHOLARONE™  
Manuscripts



**TITLE:** Blood Eosinophils, Fractional Exhaled Nitric Oxide, and the Risk of Asthma Attacks in Randomised Controlled Trials: Protocol for a Systemic Review and Control Arm Patient-Level Meta-Analysis for Clinical Prediction Modelling

**AUTHORS:** Simon Couillard<sup>1-3</sup>, MD FRCPC ORCID 0000-0002-4057-6886

Ewout Steyerberg<sup>3</sup>, PhD ORCID 0000-0002-7787-0122

Richard Beasley<sup>4</sup> MBChB D.Sc ORCID 0000-0003-0337-406X

Ian D Pavord<sup>1</sup> DM FRCP FERS FMedSci ORCID 0000-0002-4288-5973

**From:** <sup>1</sup>Respiratory Medicine Unit and Oxford Respiratory NIHR BRC, Nuffield Department of Medicine, University of Oxford, Old Road Campus, Oxford OX3 7FZ. <sup>2</sup>Faculté de Médecine et des Sciences de la Santé, Université de Sherbrooke, 3001 12<sup>e</sup> Avenue Nord, Sherbrooke (Québec), QC J1H 5N4, Canada and <sup>3</sup>Department of Biomedical Data Sciences, Leiden University Medical Center, Leiden, The Netherlands <sup>4</sup>Medical Research Institute of New Zealand, Private Bag 7902, Newtown, Wellington, New Zealand.

**Address for correspondence:** Dr Simon Couillard, Respiratory Medicine Unit and Oxford Respiratory NIHR BRC, Nuffield Department of Medicine, University of Oxford, Oxford OX3 7FZ, United-Kingdom. E-mail: [s.couillard@usherbrooke.ca](mailto:s.couillard@usherbrooke.ca)

**Registration:** In accordance with reporting guidelines, the systematic review protocol was registered with the International Prospective Register of Systematic Reviews (PROSPERO) on 23 March 2021 and was last updated on 23 June 2021 (registration number CRD42021245337)

**Word count:** 2781/4000

1  
2  
3 **Financial/nonfinancial disclosures: The authors declare the following:**  
4  
5

- 6
- 7 • Funding: This work was supported by the NIHR Oxford BRC. The funders had no role in  
8 the conduct of the study nor the writing of the manuscript. The views expressed are those  
9 of the authors and not necessarily those of the NHS, the NIHR or the Department of Health.  
10
  - 11 • For the purpose of Open Access, the author has applied a CC BY public copyright license  
12 to any Author Accepted Manuscript version arising from this submission.  
13
  - 14 • Ethics: the protocol has been reviewed by the Oxford Tropical Research Ethics Committee  
15 and found to comprise fully anonymised data not requiring further ethical approbation.  
16  
17  
18  
19  
20  
21  
22

23 **Patient and public involvement:** None.  
24

25  
26 **Author contributions:** SC drafted the protocol and participated in the systematic review literature  
27 search, contacted relevant data providers and will participate in data extraction and analysis. ES  
28 will provide statistical expertise and support. RB provided insight on the study design and  
29 contributed to manuscript writing. IDP is the guarantor of this publication, contributed to the  
30 writing of the protocol manuscript, participated in the systematic review literature search, and  
31 approved the final manuscript. All authors reviewed and approved the final manuscript.  
32  
33  
34  
35  
36  
37  
38  
39  
40

41 **Author declaration of conflicts of interest**  
42  
43  
44

45 **SC:** received a non-restricted research grant from Sanofi-Genzyme for investigator-initiated type  
46 2 innovation research and received speaker honoraria from GlaxoSmithKline, Sanofi-Regeneron  
47 and AstraZeneca; outside the submitted work. **ES:** receives royalties from Springer for the  
48 textbook entitled Clinical Prediction Models and received speaker honoraria from  
49 GlaxoSmithKline; outside the submitted work. **RB** has received honoraria for presentations or  
50  
51  
52  
53  
54  
55  
56  
57  
58  
59  
60

1  
2  
3 consulting in Adboards from AstraZeneca, Asthma and Respiratory Foundation of New Zealand,  
4  
5 Avillion, Cipla and Theravance; and research grants from AstraZeneca, CureKids (NZ),  
6  
7 Genentech, and the Health Research Council of New Zealand. **IDP:** In the last 5 years, IP has  
8  
9 received speaker's honoraria for speaking at sponsored meetings from AstraZeneca, Boehringer  
10  
11 Ingelheim, Aerocrine AB, Almirall, Novartis, Teva, Chiesi, Sanofi/Regeneron, Menarini, and  
12  
13 GSK, and payments for organising educational events from AstraZeneca, GSK, Sanofi/Regeneron,  
14  
15 and Teva. He has received honoraria for attending advisory panels with Genentech,  
16  
17 Sanofi/Regeneron, AstraZeneca, Boehringer Ingelheim, GSK, Novartis, Teva, Merck, Circassia,  
18  
19 Chiesi, and Knopp, and payments to support FDA approval meetings from GSK. He has received  
20  
21 sponsorship to attend international scientific meetings from Boehringer Ingelheim, GSK,  
22  
23 AstraZeneca, Teva, and Chiesi. He has received a grant from Chiesi to support a phase 2 clinical  
24  
25 trial in Oxford. He is co-patent holder of the rights to the Leicester Cough Questionnaire and has  
26  
27 received payments for its use in clinical trials from Merck, Bayer, and Insmad. In 2014-2015 he  
28  
29 was an expert witness for a patent dispute involving AstraZeneca and Teva.  
30  
31  
32  
33  
34  
35  
36  
37  
38  
39  
40  
41  
42  
43  
44  
45  
46  
47  
48  
49  
50  
51  
52  
53  
54  
55  
56  
57  
58  
59  
60

**ABSTRACT:**

**Introduction:** The reduction of the risk of asthma attacks is a major goal of guidelines. The fact that type-2 inflammatory biomarkers identify a higher risk, anti-inflammatory responsive phenotype is potentially relevant to this goal. We aim to quantify the relation between blood eosinophils, exhaled nitric oxide (FeNO) and the risk of severe asthma attacks.

**Methods and Analysis:** A systematic review of randomised controlled trials (RCTs) will be conducted by searching MEDLINE from January 1993 to April 2021. We will include RCTs that investigated the effect of fixed treatment(s) regimen(s) on severe asthma exacerbation rates over at least 24 weeks and reported a baseline value for blood eosinophils and FeNO. Study selection will follow the Preferred Reporting Items for Systematic Reviews and Meta-Analyses guidelines, and the methodological appraisal of the studies will be assessed by the Cochrane Risk-of-Bias Tool for RCTs. Study authors will be contacted to request anonymised individual participant data for patients randomised to the trial's control arm. An individual participant data meta-analysis will be performed for multivariable prognostic modelling with performance assessment (calibration plots and the c-statistic) in a cross-validation by study procedure. The outcome to predict is the absolute number of severe asthma attacks to occur in the following 12 months if anti-inflammatory therapy is not changed (*i.e.*: annualised number of attacks requiring  $\geq 3$  days of systemic corticosteroids and/or hospitalisation if the patient was randomised to the control arm of an RCT). A summary prognostic equation and risk stratification chart will be reported as a basis for further analyses of individualized treatment benefit.

**Ethics and Dissemination:** The protocol has been reviewed by the relevant Oxford academic ethics committee and found to comprise fully anonymised data not requiring further ethical

1  
2  
3 approbation. Results will be communicated in an international meeting and submitted to a peer-  
4  
5 reviewed journal.  
6  
7

8  
9 **Registration:** PROSPERO CRD42021245337.  
10

11  
12 **Word count:** 300/300  
13

## 14 15 **ARTICLE SUMMARY** 16

### 17 18 **Strengths and limitations of this study** 19

- 20  
21  
22 • The prognostic (*i.e.* predicting adverse outcomes) and theragnostic (*i.e.* predicting  
23 treatment responsiveness) values of type-2 inflammatory biomarkers are established; we  
24 thus speculate that a clinical prediction model centred on blood eosinophils and exhaled  
25 nitric oxide will provide a useful framework for a preventive, treatable trait-based  
26 management.  
27  
28
- 29 • This systematic review and individual patient data (IPD) level meta-analysis of randomised  
30 controlled trials (RCTs) across the spectrum of asthma severities will support clinical  
31 decision-making based on type-2 inflammatory biomarkers and other clinical prognostic  
32 factors.  
33
- 34 • We aim to include data from a substantial number of RCTs (N>10) for a large number of  
35 patients in total (n>5000), which allows for reliable statistical modelling (internal validity)  
36 and assessment of transportability across settings (external validity).  
37  
38
- 39 • The participating studies' authors and sponsors will form an international, collaborative,  
40 and not-for-profit consortium to allow efficient use of high-quality IPD.  
41  
42  
43  
44  
45  
46  
47  
48  
49  
50  
51  
52  
53  
54  
55  
56  
57  
58  
59  
60

- 1  
2  
3 • Potential weaknesses are the low number of events reported in RCTs enrolling mild  
4  
5 asthmatics and the absence of active arm IPD.  
6  
7

8  
9 **Word count:** 5 / 5 one-sentence bullet points  
10  
11  
12  
13  
14  
15  
16  
17  
18  
19  
20  
21  
22  
23  
24  
25  
26  
27  
28  
29  
30  
31  
32  
33  
34  
35  
36  
37  
38  
39  
40  
41  
42  
43  
44  
45  
46  
47  
48  
49  
50  
51  
52  
53  
54  
55  
56  
57  
58  
59  
60

For peer review only

## ABBREVIATIONS

CI: confidence intervals

FeNO: fractional exhaled nitric oxide

GINA: Global Initiative for Asthma

ICS: inhaled corticosteroid

IL: interleukin

IPD: individual participant data

MA: meta-analysis

RCT: randomised controlled trial

## INTRODUCTION

Reduction of the risk of severe asthma attacks is a major goal of asthma management [1]. The current recommendation is to perform risk assessment based on a history of a previous asthma attack and a list of clinical risk factors (Table 1) [1]. However, many of these prognostic factors are unmodifiable or difficult to modify and a key risk factor (treatment adherence) is difficult to identify and quantify before starting treatment. In contrast, some risk factors are modifiable, such as symptoms and lung function, while they are not necessarily on the causal pathway of asthma attacks. As a result of these deficiencies, risk quantification in asthma is an inexact art and the impact of treatment is difficult to predict [2–13].

One approach to targeted risk reduction is to use a scale centred on readily available prognostic factors that quantify the risk of the adverse outcome of interest in a manner which also predicts the benefits of preventative treatment. This approach has been successful in cardiovascular disease risk reduction where charts [14,15] focus on modifiable factors such as blood pressure and cholesterol with age and gender as key prognostic demographic factors. We speculate that a similar framework can be applied to predict asthma attacks in patients with asthma.

Type-2 airway inflammation is important in the pathogenesis of many asthma attacks [16] where this immune response characterised by interleukin (IL)-4, IL-5, IL-13, and eosinophilic airway infiltration forms a distinct clinical phenotype [16]. In clinic, the actions of type-2 immunity are readily identified by two independent, complementary, and accessible biomarkers: the peripheral blood eosinophil count and fractional exhaled nitric oxide (FeNO) [17–24]. Importantly, the excess risk conferred by raised type-2 biomarkers can be removed with appropriate treatment [24], be it low-dose inhaled corticosteroids (ICS) in mild asthma [19,25], a higher dose of ICS in moderate



1  
2  
3 asthma [21,26], or biological agents targeting type 2 cytokines in moderate and severe asthma  
4  
5 [18,27–29]. In effect, blood eosinophils and FeNO have emerged as ‘treatable traits’ [30].  
6  
7

8  
9 We have previously established a proof-of-concept biomarker-stratified asthma attack scale using  
10  
11 publication-level data which is promising and potentially useful to support clinical decision-  
12  
13 making [23]. The prototype lacked detailed and statistically robust assessment of multivariable  
14  
15 prognostic relations and systematic assessment of external validity, which is possible with an  
16  
17 individual participant data (IPD) meta-analysis (MA).  
18  
19

## 20 21 **Review question**

22  
23  
24 In people  $\geq 12$  years old diagnosed with asthma of any severity randomised to the control arm of  
25  
26 a clinical trial, what is the annualised rate of severe asthma attacks (defined as acute asthma  
27  
28 requiring  $\geq 3$  days of systemic corticosteroids and/or hospitalisation)[31] to occur in relation to  
29  
30 their peripheral blood eosinophil count, FeNO, and other prognostic factors at baseline?  
31  
32  
33

## 34 35 **Objectives**

36  
37  
38 Specific aims of this systematic review are

- 39  
40  
41 1. To systematically identify randomised controlled trials (RCTs) in people  $\geq 12$  years old  
42  
43 diagnosed with asthma of any severity which measured i) the peripheral blood eosinophil  
44  
45 count and FeNO at baseline and ii) assessed the incident severe asthma attacks over  $\geq 24$   
46  
47 weeks of follow-up.  
48  
49
- 50  
51 2. To perform an IPD MA for the participants randomised to the control arms (defined as no  
52  
53 inhaled corticosteroid (ICS), lowest dose ICS, or placebo) of the RCTs identified in aim 1.  
54  
55  
56  
57  
58  
59

- 3 4 5 6 7 8 9 10 11 12 13 14 15
3. To assess the multivariable prognostic relations of the peripheral blood eosinophil count, FeNO, and other risk factors assessed at baseline.
4. To develop and validate a clinical prediction model for the absolute number of severe asthma attacks to occur in the following 12 months in relation to the peripheral blood eosinophil count, FeNO, and other risk factors at baseline.

## 16 17 18 19 20 21 22 23 24 25 26 27 28 29 30 31 32 33 34 35 36 37 38 39 40 41 42 43 44 45 46 47 48 49 50 51 52 53 54 55 56 57 58 59 60

## METHODS AND ANALYSIS

### Eligibility

#### *Types of studies*

In keeping with the objectives of the systematic review, we will include RCTs completed between 1 January 1993 and 1 April 2021 that investigated the effect of fixed treatment(s) regimen(s) on severe asthma attack rates over at least 6 months, also reporting a baseline value for blood eosinophils and FeNO.

#### *Types of participants*

We will include studies on participants ages 12 and over diagnosed with asthma of any severity according to objective criteria. We will exclude patients if both the baseline blood eosinophil count and FeNO are missing. We will also exclude patients with missing follow-up duration whilst on the allocated therapy, or missing number of severe asthma attacks during follow-up.

#### *Types of interventions*

We will request IPD for the control arm(s) of each trial. We define the ‘control arm’ as patients with the lowest anti-inflammatory therapy intensity after randomisation (*i.e.* group with no ICS, lowest dose ICS, or placebo).

### *Types of comparison conditions*

Not applicable, as this is a prognostic IPD MA.

### *Types of outcome measures*

The outcome is the occurrence of severe asthma attacks, defined as the number of acute asthma episodes requiring  $\geq 3$  days of systemic corticosteroids and/or hospitalisation. This was the primary outcome in many RCTs. Severe asthma attacks are important for patients, physicians, and health insurance providers due to the high morbidity and financial burden [31]. The severe asthma attack rate is known to be modifiable following appropriate anti-inflammatory therapy in patients with high type-2 biomarkers [18,19,21]. The minimal clinically important difference for the annualised severe asthma attack rates in RCTs has not been determined, although it has been estimated to be 20-40% in a recent expert consensus document [32].

### **Search strategy**

We will search MEDLINE (PubMed interface) for RCTs from 1 January 1993 to 1 April 2021 that fit the eligibility criteria.

Our search will use the term 'asthma exacerbations' (("asthma"[MeSH Terms] OR "asthma"[All Fields] OR "asthmas"[All Fields] OR "asthma s"[All Fields]) AND ("exacerbate"[All Fields] OR "exacerbated"[All Fields] OR "exacerbates"[All Fields] OR "exacerbating"[All Fields] OR "exacerbation"[All Fields] OR "exacerbations"[All Fields] OR "exacerbator"[All Fields] OR "exacerbators"[All Fields])), filtered for 'randomised controlled trials' 'humans' 'ages 12 and over' and languages English and French. The details of the PubMed query are listed in the Supplementary Material. Literature search results will be uploaded to Microsoft EndNote. Titles and abstracts of all records returned by the literature search will be screened to identify potentially

1  
2  
3 relevant publications which include the word 'eosinophil' OR 'FeNO' OR 'nitric oxide' OR  
4 'exhaled NO'. Manual reference searching will be performed for completed clinical trials that are  
5  
6 in press at the time of the systematic review. Two reviewers (SC and IDP) will independently  
7  
8 review the retained publications to select trials for inclusion. We will resolve disagreement through  
9  
10 discussion. We will record the reasons for excluding trials. Neither of the authors will be blind to  
11  
12 the journal titles or to the study authors or institutions.  
13  
14  
15

## 16 17 18 **Data collection**

### 19 20 21 *Request for individual participant data*

22  
23 The authors of the retained studies will be contacted to obtain IPD. The corresponding author of  
24  
25 each publication, and the representative(s) of the trial sponsor when applicable, will be sent an  
26  
27 invitation letter and a skeleton Microsoft Excel spreadsheet containing the relevant fields for data  
28  
29 extraction.  
30  
31

### 32 33 34 *Data items*

35  
36 Anonymised individual patient data to be requested includes demographics (age, body mass  
37  
38 index); baseline lung function with post-bronchodilator reversibility; treatment step according to  
39  
40 anti-inflammatory components (Table 2); inhaled corticosteroid daily dosage; other asthma  
41  
42 controller or reliever medications; presence of any Global Initiative for Asthma (GINA) defined  
43  
44 risk factors (Table 1) at baseline, when available; severe asthma attack history in the year prior to  
45  
46 trial enrolment; the intervention the patient was randomised to; the peripheral blood eosinophil  
47  
48 count, total immunoglobulin E, specific airborne sensitisation, and FeNO at baseline; duration of  
49  
50 follow-up under controlled therapy; and the outcome of interest, *i.e.* the number of severe asthma  
51  
52 attacks during follow-up.  
53  
54  
55  
56  
57  
58  
59  
60

### *Risk of bias in individual studies*

To facilitate the assessment of possible bias for each study, we will collect information using the Cochrane Collaboration tool for assessing the risk of bias [33], which covers: sequence generation, allocation concealment, blinding, incomplete outcome data (*e.g.* dropouts and withdrawals) and selective outcome reporting. For each domain in the tool, we will detail the procedures undertaken for each study, including verbatim quotes. A judgement as to the risk of bias on each of the six domains will be made from the extracted information, rated as ‘high risk’ or ‘low risk’. If there is insufficient detail reported in the study, we will judge the risk of bias as ‘unclear’ and the original study investigators will be contacted for more information. These judgements will be made independently by two authors based on the criteria for judging the risk of bias [33]. Disagreements will be resolved first by discussion and then by consulting a third author for arbitration. We will compute graphic representations of potential bias within and across studies. We will consider each item in the risk of bias assessment independently without an attempt to collate and assign an overall score.

### **Data extraction**

Data providers contacted following the systematic review will be provided sufficient time and support to confirm their consent for data extraction through data sharing contracts. Data sharing will be free of charge, financial contributions, and/or barriers to the dissemination of the results.

### **Data management and sharing**

Secure digital transfer and storage solutions are provided by the University of Oxford. Under the terms of the data sharing agreements, access to the complete dataset is restricted to the named

1  
2  
3 authors on the current study protocol who are bound by contract to the University of Oxford. Future  
4  
5 third-party data sharing requests will need to be submitted to the original study authors.  
6  
7

## 8 9 **Data analysis and synthesis**

10  
11  
12 In relation with the objectives of this study, the data will be analysed and presented according to  
13  
14 the following formats:

- 15  
16  
17  
18 1. Results of the systematic review will be reported as per Preferred Reporting Items for  
19  
20 Systematic Reviews and Meta-Analyses (PRISMA) guidelines [34]. All identified studies  
21  
22 will be enumerated and detailed, irrespective of the provision of individual participant data.  
23
- 24  
25 2. Results of the multivariable prognostic analysis will report on univariate and multivariable  
26  
27 coefficients from negative binomial regression on the annualised severe asthma attack  
28  
29 rates. Important predictors to be assessed are the baseline blood eosinophil count and  
30  
31 baseline FeNO values. Reporting will be in categories according to commonly accepted  
32  
33 cut-offs (blood eosinophils,  $0.15 < 0.30$ ,  $\geq 0.30 \times 10^9$  cells/L; FeNO,  $< 25$ ,  $25 < 50$ ,  $\geq 50$  ppb),  
34  
35 with more detailed modelling as continuous variables. Non-linearity will be explored with  
36  
37 `rCs` functions, with the number of knots guided by AIC. Relations will be plotted with  
38  
39 95% confidence intervals (CI). Other important prognostic factors include treatment steps  
40  
41 (as per Table 2), asthma attack history, postbronchodilator forced expiratory volume in 1  
42  
43 second percentage predicted, mean score on the 5-item Asthma Control Questionnaire, and  
44  
45 body mass index; potential predictors are listed fully in the statistical analysis plan version  
46  
47 1.1, section 4.4 (Online Supplementary Material). Interactions between blood eosinophil  
48  
49 and FeNO values will be assessed according to AIC. If relevant, combined effects will be  
50  
51 summarised in a  $3 \times 3$  matrix stratified by the blood eosinophil count ( $< 0.15$ ,  $0.15 < 0.30$ ,  
52  
53  
54  
55  
56  
57  
58  
59  
60

1  
2  
3  $\geq 0.30 \times 10^9$  cells/L) and FeNO (<25, 25-<50,  $\geq 50$  ppb), and plotted in interaction plots with  
4  
5 95% CI. Heterogeneity in estimates between studies will be quantified by  $I^2$  statistics.  
6  
7

- 8 3. Clinical prediction modelling will be based on the statistical analysis plan (version 1.1)  
9  
10 presented in the Supplementary Material. Briefly, we will use the study population as a  
11  
12 derivation cohort, with stratification by study. Validation will be according to an internal  
13  
14 – external cross-validation procedure, where each study is left out once [35]. The selection  
15  
16 of predictors will be based on the results of the multivariable prognostic analyses. A  
17  
18 summary prognostic equation will be produced, assessed by the principal investigators, and  
19  
20 adapted to GINA treatment step reference attack rates (*e.g.*: [36]) to allow for a user-  
21  
22 friendly prediction summary table similar to the reported prototype (figure). Performance  
23  
24 of the predictive equation and table will be assessed separately with calibration plots, c-  
25  
26 statistic, and decision-analytic measures as outlined in the statistical analysis plan (see  
27  
28 Supplementary Material).  
29  
30  
31  
32  
33

### 34 *Study power*

35  
36 Considering a mean annualised severe asthma attack of 0.6 in the entire study population and a  
37  
38 conservative estimate that the derivation cohort will comprise 50% of the individual patient data  
39  
40 reported in our prototype scale ( $0.5 \times 3051 = 1525$ ) [23], there should be approximately 915 events  
41  
42 to derive a clinical prediction model. This provides for a solid basis for statistical modelling  
43  
44 considering the limited number of potential predictors (around 10), leading a favourable event per  
45  
46 variable (EPV) ratio (EPV=92) [37]. However, we concede that the EPV will be considerably  
47  
48 lower for mild asthma populations, where trials identified less than 100 severe asthma attack events  
49  
50 in their control arms [25,38]. Conversely, the study will be more than adequately powered for  
51  
52 moderate-to-severe asthma.  
53  
54  
55  
56  
57  
58  
59  
60

### *Statistical software and confidence intervals*

Data analysis will be conducted in collaboration with the study statistician (ES) using R software and the `rms` package. Reported outputs will present estimates and accompanying two-sided 95% CI. Bootstrap resampling will be applied to assess internal validity. Cross-validation by study will be performed to assess external validity.

### **Ethics and dissemination**

The protocol has been reviewed by the academic ethics committee (Oxford Tropical Research Ethics Committee (OxTREC)) and found to comprise fully anonymised data not requiring further ethical approbation. The results of the systematic review, patient-level multivariable prognostic MA, and clinical prediction models will be presented in an international scientific meeting and submitted for publication.



## DISCUSSION

This protocol for a systematic review and IPD MA of RCTs across the spectrum of asthma severities coincides with a clinical prediction modelling effort centred on the peripheral blood eosinophil count and FeNO. Indeed, we speculate that these two biomarkers are the airway equivalent of high blood pressure or serum cholesterol, insofar as they identify a pathological process which relates to the risk key adverse outcomes (asthma attacks) that is modifiable by treatment (anti-inflammatory medication).

The focus on two biomarkers to predict the modifiable risk of asthma attacks is novel compared to existing clinical prediction models [2–13], where prognostic variables do not include nor adjust for blood eosinophils and FeNO. The established prognostic (*i.e.* predicting adverse outcomes) and theragnostic (*i.e.* predicting treatment responsiveness) values of these type-2 inflammatory biomarkers [17–24] provide a strong basis for a clinical prediction model centred on these independent, additive, and, most importantly, modifiable risk factors. The current protocol extends our previous proof-of-concept [23] work suggesting that traditional clinical risk factors can and should be adjusted for type-2 inflammatory biomarkers. Another novel aspect of our project is our intention to collaborate with a wide variety of authors and sponsors to form an international, data-driven, and not-for-profit consortium to support the development and validation of a robust clinical prediction model.

Despite the rigorous PRISMA [34] and Cochrane [33] methodologies which will be used to identify high-quality RCTs, there are areas of potential weaknesses in our study design which warrant discussion. First, we will limit our search strategy to MEDLINE. This approach was decided after a preliminary search in MEDLINE alone showed potential for >5000 control arm

1  
2  
3 patients eligible to the IPD MA component; more than required to power our multivariable  
4 prognostic assessment and sufficient to claim that the included studies will be identified  
5 systematically rather than subjectively. Second, RCTs enrolling mild asthmatics have reported low  
6 absolute severe asthma attack rates [25,38], which may limit the model's reliability for low-risk  
7 patients. Third, a RCT-based clinical prediction model will be difficult to subsequently validate in  
8 real-world settings where treatment intensity fluctuates in response to the perceived risk of asthma  
9 attacks. Such real-world fluctuation in treatment regimens may weaken the relation between static  
10 biomarker measurements and 12-month observed asthma attack rates. Nevertheless, we speculate  
11 that physician-patient discussions can be assisted by a clinical prediction model which estimates  
12 the risk of asthma attacks if anti-inflammatory treatment is not changed, *i.e.*: if the patient were  
13 randomised to the control arm of an RCT. Fourth, controlled trials in asthma are notorious for a  
14 strong placebo effect. This caveat may be due to improved adherence to ICS, the Hawthorne effect,  
15 regression to the mean, or a combination of factors [39]. It is potentially surmountable by adapting  
16 the resultant clinical prediction model using reference asthma attack rates according to treatment  
17 intensity, as previously reported in a claims-based study [36] and proposed in our statistical  
18 analysis plan. Last, we have not planned to request active arm individual participant data, thus  
19 limiting our ability to assess the individual treatment benefit [40] or model heterogeneity of  
20 treatment effects [41]. We will not pursue the active arms' data to promote collaboration between  
21 competing sponsors but envision a de-centralised computation of individual treatment benefit and  
22 aggregate performance measures, such as the c-for-benefit statistic, at a later stage.

23  
24  
25  
26  
27  
28  
29  
30  
31  
32  
33  
34  
35  
36  
37  
38  
39  
40  
41  
42  
43  
44  
45  
46  
47  
48  
49  
50 To conclude, we propose a systematic review and IPD MA to predict severe asthma attacks based  
51 on the inflammatory and clinical risk profile. Our emphasis on the risk conferred by raised type-2  
52 inflammatory biomarkers and the consortium approach central to our endeavour may distinguish  
53  
54  
55  
56  
57  
58  
59  
60

1  
2  
3 it from existing prediction models [2–13]. We speculate that a clinical prediction model centred  
4  
5 on blood eosinophils and FeNO will provide a useful basis for a preventive, treatable trait-based  
6  
7 asthma management.  
8  
9  
10  
11  
12  
13  
14  
15  
16  
17  
18  
19  
20  
21  
22  
23  
24  
25  
26  
27  
28  
29  
30  
31  
32  
33  
34  
35  
36  
37  
38  
39  
40  
41  
42  
43  
44  
45  
46  
47  
48  
49  
50  
51  
52  
53  
54  
55  
56  
57  
58  
59  
60

For peer review only

**TABLE 1**  
**Clinical risk factors for asthma exacerbations with their traditional categorisations**

| <b>Risk factors</b>                                  | <b>Value (if pertinent)</b>                           |
|------------------------------------------------------|-------------------------------------------------------|
| Poor control of asthma symptoms                      | mean ACQ score $\geq 1.5$                             |
| Limited lung function:                               |                                                       |
| low FEV1                                             | < 60-80% predicted                                    |
| high postbronchodilator reversibility                | >12% change in FEV1                                   |
| Adherence poor (inadequate technique or inhaler use) |                                                       |
| Reliever use excessive                               | > one 200-dose canister/month                         |
| Intubation or ICU admission for asthma on history    |                                                       |
| Comorbidities:                                       |                                                       |
| chronic rhinosinusitis                               |                                                       |
| obesity                                              | body mass index $\geq 35$ kg/m <sup>2</sup>           |
| psychiatric disease                                  | psychosis, substance abuse                            |
| Environmental exposure:                              |                                                       |
| smoking                                              |                                                       |
| allergen exposure in sensitised patient              |                                                       |
| air pollution                                        | especially high O <sub>3</sub> and/or NO <sub>2</sub> |

ACQ = asthma control questionnaire; FEV1 = forced expiratory volume in 1 second; ICU = intensive care unit; PoLAR ICE = mnemonic (see bold characters in table). Adapted from Global Initiative for Asthma Guidelines [1]. Where possible, risk factors will also be analysed in continuous versions with restricted cubic splines to allow for non-linear associations.

**TABLE 2**  
**Treatment step definitions**

| Treatment step | Definition                                                                                                                                                                      |
|----------------|---------------------------------------------------------------------------------------------------------------------------------------------------------------------------------|
| <b>Step 1</b>  | As-needed short-acting beta2-agonist                                                                                                                                            |
| <b>Step 2</b>  | Daily low dose ICS <u>or</u><br>As-needed low dose ICS-formoterol<br>Daily leukotriene receptor agonist                                                                         |
| <b>Step 3</b>  | Daily low dose ICS + an additional controller therapy                                                                                                                           |
| <b>Step 4</b>  | Any medium dose ICS-containing regimen                                                                                                                                          |
| <b>Step 5</b>  | Any high dose ICS-containing regimen <u>or</u><br>Any maintenance systemic corticosteroid use (defined as use of systemic corticosteroids for $\geq 50\%$ of the previous year) |

ICS, inhaled corticosteroid. Modified from Global Initiative for Asthma 2017 and 2021 [1] guidelines.

## FIGURE LEGEND

**The prototype OxfoRd Asthma attaCk risk scaLE.** Numbers in each cell are predicted annual asthma attack rates for patients over the age of 12 if treatment is not changed. An asthma attack is an episode of acute asthma requiring treatment with systemic steroids  $\geq 3$  days and/or hospitalisation. The blood eosinophil count is contemporaneous or the highest result in last 12 months; fractional exhaled nitric oxide level (FeNO) is contemporaneous. \*Risk factors are defined by the Global Initiative for Asthma (GINA) guidelines [1]: poor symptom control (ACQ score  $\geq 1.5$ ), low lung function (FEV1  $< 80\%$  predicted), adherence issues, reliever over-use ( $> 200$ -dose salbutamol cannister/month), intubation or intensive care unit admission for asthma previously, comorbidities (one of: chronic rhinosinusitis, obesity, psychiatric disease), environmental exposures (one of: smoking, allergen, pollution). Reproduced from reference [23] with permission under the original CC BY public copyright license.

**REFERENCES**

- 1 Global Initiative for Asthma (GINA). Global Strategy for Asthma Management and Prevention (2021 update). 2021. <https://ginasthma.org/>
- 2 Bateman ED, Buhl R, O'Byrne PM, *et al.* Development and validation of a novel risk score for asthma exacerbations: The risk score for exacerbations. *Journal of Allergy and Clinical Immunology* 2015;**135**:1457-1464.e4. doi:10.1016/j.jaci.2014.08.015
- 3 Miller MK, Lee JH, Blanc PD, *et al.* TENOR risk score predicts healthcare in adults with severe or difficult-to-treat asthma. *European Respiratory Journal* 2006;**28**:1145–55. doi:10.1183/09031936.06.00145105
- 4 Loymans RJBB, Honkoop PJ, Termeer EH, *et al.* Identifying patients at risk for severe exacerbations of asthma: development and external validation of a multivariable prediction model. *Thorax* 2016;**71**:838–46. doi:10.1136/thoraxjnl-2015-208138
- 5 Eisner MD, Yegin A, Trzaskoma B. Severity of asthma score predicts clinical outcomes in patients with moderate to severe persistent asthma. *Chest* 2012;**141**:58–65. doi:10.1378/chest.11-0020
- 6 Sato R, Tomita K, Sano H, *et al.* The Strategy for Predicting Future Exacerbation of Asthma Using a Combination of the Asthma Control Test and Lung Function Test. *Journal of Asthma* 2009;**46**:677–82. doi:10.1080/02770900902972160

- 1  
2  
3 7 Peters D, Chen C, Markson LE, *et al.* Using an asthma control questionnaire and  
4 administrative data to predict health-care utilization. *Chest* 2006;**129**:918–24.  
5  
6 doi:10.1378/chest.129.4.918  
7  
8  
9  
10  
11 8 Yurk RA, Diette GB, Skinner EA, *et al.* Predicting Patient-Reported Asthma Outcomes for  
12 Adults in Managed Care. *American Journal of Managed Care* 2004;**10**:321–8.  
13  
14  
15  
16  
17 9 Schatz M, Cook EF, Joshua A, *et al.* Risk factors for asthma hospitalizations in a managed  
18 care organization: Development of a clinical prediction rule. *American Journal of Managed*  
19 *Care* 2003;**9**:538–47.  
20  
21  
22  
23  
24 10 Lieu TA, Capra AM, Quesenberry CP, *et al.* Computer-based models to identify high-risk  
25 adults with asthma: Is the glass half empty or half full? *Journal of Asthma* 1999;**36**:359–70.  
26  
27 doi:10.3109/02770909909068229  
28  
29  
30  
31  
32 11 Ellman MS, Viscoli CM, Sears MR, *et al.* A new index of prognostic severity for chronic  
33 asthma. *Chest* 1997;**112**:582–90. doi:10.1378/chest.112.3.582  
34  
35  
36  
37  
38 12 Grana J, Preston S, McDermott PD, *et al.* The Use of Administrative Data to Risk-Stratify  
39 Asthmatic Patients. *American Journal of Medical Quality* 1997;**12**:113–9.  
40  
41 doi:10.1177/0885713X9701200205  
42  
43  
44  
45  
46 13 Osborne ML, Pedula KL, O'Hollaren M, *et al.* Assessing future need for acute care in adult  
47 asthmatics: The profile of asthma risk study: A prospective health maintenance  
48 organization-based study. *Chest* 2007;**132**:1151–61. doi:10.1378/chest.05-3084  
49  
50  
51  
52  
53  
54  
55  
56  
57  
58  
59  
60



- 1  
2  
3 14 Jackson R, Barham P, Bills J, *et al.* Management of raised blood pressure in New Zealand:  
4 A discussion document. *British Medical Journal*. 1993;**307**:107–10.  
5  
6 doi:10.1136/bmj.307.6896.107  
7  
8  
9  
10  
11 15 Conroy RM, Pyörälä K, Fitzgerald AP, *et al.* Estimation of ten-year risk of fatal  
12 cardiovascular disease in Europe: The SCORE project. *European Heart Journal*  
13 2003;**24**:987–1003. doi:10.1016/S0195-668X(03)00114-3  
14  
15  
16  
17  
18  
19 16 Pavord ID, Beasley R, Agusti A, *et al.* After asthma: redefining airways diseases. *The*  
20 *Lancet*. 2018;**391**:350–400. doi:10.1016/S0140-6736(17)30879-6  
21  
22  
23  
24  
25 17 Busse WW, Wenzel SE, Casale TB, *et al.* Baseline FeNO as a Prognostic Biomarker for  
26 Subsequent Severe Asthma Exacerbations in Patients With Uncontrolled, Moderate-to-  
27 Severe Asthma Receiving Placebo in the LIBERTY ASTHMA QUEST Study: A Post Hoc  
28 Analysis. *The Lancet Respiratory Medicine* 2021;**0**. doi:10.1016/S2213-2600(21)00124-7  
29  
30  
31  
32  
33  
34  
35 18 Shrimanker R, Keene O, Hynes G, *et al.* Prognostic and predictive value of blood eosinophil  
36 count, fractional exhaled nitric oxide, and their combination in severe asthma: A post hoc  
37 analysis. *American Journal of Respiratory and Critical Care Medicine* 2019;**200**:1308–12.  
38  
39  
40  
41  
42  
43  
44  
45 19 Pavord ID, Holliday M, Reddel HK, *et al.* Predictive value of blood eosinophils and exhaled  
46 nitric oxide in adults with mild asthma: a prespecified subgroup analysis of an open-label,  
47 parallel-group, randomised controlled trial. *The Lancet Respiratory Medicine* 2020;**8**:671–  
48  
49  
50  
51  
52  
53  
54  
55  
56  
57  
58  
59  
60

- 1  
2  
3 20 Kraft M, Brusselle G, Mark FitzGerald J, *et al.* Patient characteristics, biomarkers, and  
4 exacerbation risk in severe, uncontrolled asthma. *European Respiratory Journal* 2021;**59**.  
5  
6 doi:10.1183/13993003.00413-2021  
7  
8  
9  
10  
11 21 Lee LA, Bailes Z, Barnes N, *et al.* Efficacy and safety of once-daily single-inhaler triple  
12 therapy (FF/UMEC/VI) versus FF/VI in patients with inadequately controlled asthma  
13 (CAPTAIN): a double-blind, randomised, phase 3A trial. *The Lancet Respiratory Medicine*  
14 2021;**9**:69–84. doi:10.1016/S2213-2600(20)30389-1  
15  
16  
17  
18  
19  
20  
21 22 Couillard S, Shrimanker R, Chaudhuri R, *et al.* Fractional Exhaled Nitric Oxide  
22 Nonsuppression Identifies Corticosteroid-Resistant Type 2 Signaling in Severe Asthma.  
23  
24 *American Journal of Respiratory and Critical Care Medicine* 2021;**204**:731–4.  
25  
26 doi:10.1164/rccm.202104-1040LE  
27  
28  
29  
30  
31 23 Couillard S, Laugerud A, Jabeen M, *et al.* Derivation of a prototype asthma attack risk scale  
32 centred on blood eosinophils and exhaled nitric oxide. *Thorax* 2022;**77**:199–202.  
33  
34 doi:10.1136/thoraxjnl-2021-217325  
35  
36  
37  
38  
39 24 Couillard S, Do W, Beasley R, *et al.* Predicting the benefits of type-2 targeted anti-  
40 inflammatory treatment with the prototype OxfoRd Asthma attaCk risk scaLE (ORACLE).  
41  
42 *ERJ Open Research* Published Online First: 2022. doi:10.1183/23120541.00570-2021  
43  
44  
45  
46  
47 25 Beasley R, Holliday M, Reddel HK, *et al.* Controlled trial of budesonide-formoterol as  
48 needed for mild asthma. *New England Journal of Medicine* 2019;**380**:2020–30.  
49  
50  
51  
52  
53  
54  
55  
56  
57  
58  
59  
60

- 1  
2  
3 26 Couillard S, Pavord I. Fluticasone furoate: CAPTAIN of fluticasones in type-2  
4 inflammatory asthma. *Respirology* 2022;**27**. doi:10.1111/resp.14213  
5  
6  
7  
8  
9 27 Pavord ID, Korn S, Howarth P, *et al*. Mepolizumab for severe eosinophilic asthma  
10 (DREAM): A multicentre, double-blind, placebo-controlled trial. *The Lancet*  
11 2012;**380**:651–9. doi:10.1016/S0140-6736(12)60988-X  
12  
13  
14  
15  
16 28 Castro M, Corren J, Pavord ID, *et al*. Dupilumab Efficacy and Safety in Moderate-to-Severe  
17 Uncontrolled Asthma. *New England Journal of Medicine* 2018;**378**:2486–96.  
18 doi:10.1056/NEJMoa1804092  
19  
20  
21  
22  
23  
24 29 Menzies-Gow A, Corren J, Bourdin A, *et al*. Tezepelumab in Adults and Adolescents with  
25 Severe, Uncontrolled Asthma. *New England Journal of Medicine* 2021;**384**:1800–9.  
26 doi:10.1056/NEJMoa2034975  
27  
28  
29  
30  
31  
32 30 Agusti A, Bel E, Thomas M, *et al*. Treatable traits: Toward precision medicine of chronic  
33 airway diseases. *European Respiratory Journal* 2016;**47**:410–9.  
34 doi:10.1183/13993003.01359-2015  
35  
36  
37  
38  
39  
40 31 Reddel HK, Taylor DR, Bateman ED, *et al*. An official American Thoracic  
41 Society/European Respiratory Society statement: Asthma control and exacerbations -  
42 Standardizing endpoints for clinical asthma trials and clinical practice. *American Journal*  
43 *of Respiratory and Critical Care Medicine* 2009;**180**:59–99. doi:10.1164/rccm.200801-  
44 060ST  
45  
46  
47  
48  
49  
50  
51  
52  
53  
54  
55  
56  
57  
58  
59  
60

- 1  
2  
3 32 Bonini M, Di Paolo M, Bagnasco D, *et al*. Minimal clinically important difference for  
4 asthma endpoints: An expert consensus report. *European Respiratory Review* 2020;**29**:1–  
5 14. doi:10.1183/16000617.0137-2019  
6  
7  
8  
9  
10  
11 33 Higgins J, Thomas J, Chandler J, *et al*. Cochrane Handbook for Systematic Reviews of  
12 Interventions (version 6.2). Cochrane. 2021. [www.training.cochrane.org/handbook](http://www.training.cochrane.org/handbook)  
13 (accessed 15 Sep 2021).  
14  
15  
16  
17  
18  
19 34 Shamseer L, Moher D, Clarke M, *et al*. Preferred reporting items for systematic review and  
20 meta-analysis protocols (PRISMA-P) 2015: elaboration and explanation. *BMJ: British*  
21 *Medical Journal* 2015;**349**:g7647. doi:10.1136/bmj.g7647  
22  
23  
24  
25  
26  
27 35 Steyerberg EW, Harrell FE. Prediction models need appropriate internal, internal-external,  
28 and external validation. *Journal of Clinical Epidemiology*. 2016;**69**:245–7.  
29 doi:10.1016/j.jclinepi.2015.04.005  
30  
31  
32  
33  
34  
35 36 Suruki RY, Daugherty JB, Boudiaf N, *et al*. The frequency of asthma exacerbations and  
36 healthcare utilization in patients with asthma from the UK and USA. *BMC Pulmonary*  
37 *Medicine* 2017;**17**. doi:10.1186/s12890-017-0409-3  
38  
39  
40  
41  
42  
43 37 Steyerberg EW. *Clinical Prediction Models*. Cham: : Springer International Publishing  
44 2019. doi:10.1007/978-3-030-16399-0  
45  
46  
47  
48 38 Hardy J, Baggott C, Fingleton J, *et al*. Budesonide-formoterol reliever therapy versus  
49 maintenance budesonide plus terbutaline reliever therapy in adults with mild to moderate  
50 asthma (PRACTICAL): a 52-week, open-label, multicentre, superiority, randomised  
51  
52  
53  
54  
55  
56  
57  
58  
59  
60

- 1  
2  
3 controlled trial. *Lancet (London, England)* 2019;**394**:919–28. doi:10.1016/S0140-  
4 6736(19)31948-8  
5  
6  
7  
8  
9 39 Luc F, Prieur E, Whitmore GA, *et al.* Placebo Effects in Clinical Trials Evaluating Patients  
10 with Uncontrolled Persistent Asthma. <https://doi.org/10.1513/AnnalsATS201901-071OC>  
11 2019;**16**:1124–30. doi:10.1513/ANNALSATS.201901-071OC  
12  
13  
14  
15  
16  
17 40 van Klaveren D, Steyerberg EW, Serruys PW, *et al.* The proposed ‘concordance-statistic  
18 for benefit’ provided a useful metric when modeling heterogeneous treatment effects.  
19 *Journal of Clinical Epidemiology* 2018;**94**:59–68. doi:10.1016/j.jclinepi.2017.10.021  
20  
21  
22  
23  
24  
25 41 Kent DM, Paulus JK, Van Klaveren D, *et al.* The Predictive Approaches to Treatment effect  
26 Heterogeneity (PATH) statement. *Annals of Internal Medicine* 2020;**172**:35–45.  
27 doi:10.7326/M18-3667  
28  
29  
30  
31  
32  
33  
34  
35  
36  
37  
38  
39  
40  
41  
42  
43  
44  
45  
46  
47  
48  
49  
50  
51  
52  
53  
54  
55  
56  
57  
58  
59  
60

| Fractional exhaled nitric oxide (ppb) |       | Asthma attack in last year?                        |  |                         |           |                         |  |                                   |  |                         |           |                         |  |
|---------------------------------------|-------|----------------------------------------------------|--|-------------------------|-----------|-------------------------|--|-----------------------------------|--|-------------------------|-----------|-------------------------|--|
|                                       |       | No                                                 |  |                         |           |                         |  | Yes                               |  |                         |           |                         |  |
|                                       |       | 2 or more clinical risk factors*?                  |  |                         | GINA Step |                         |  | 2 or more clinical risk factors*? |  |                         | GINA Step |                         |  |
|                                       |       | No                                                 |  | Yes                     |           | No                      |  | Yes                               |  | No                      |           | Yes                     |  |
| ≥50                                   | 25-50 | 0.27 0.36 0.71                                     |  | 0.35 0.47 0.93          |           | 0.75 1.01 2.00          |  | 0.98 1.32 2.60                    |  | 0.75 1.01 2.00          |           | 0.98 1.32 2.60          |  |
|                                       |       | 0.21 0.27 0.35                                     |  | 0.27 0.36 0.46          |           | 0.58 0.77 0.98          |  | 0.75 1.00 1.28                    |  | 0.58 0.77 0.98          |           | 0.75 1.00 1.28          |  |
|                                       |       | 0.20 0.25 0.35                                     |  | 0.26 0.33 0.46          |           | 0.57 0.71 0.98          |  | 0.74 0.93 1.28                    |  | 0.57 0.71 0.98          |           | 0.74 0.93 1.28          |  |
| 25-50                                 | <25   | 0.11 0.15 0.29                                     |  | 0.14 0.19 0.38          |           | 0.31 0.41 0.82          |  | 0.40 0.54 1.06                    |  | 0.31 0.41 0.82          |           | 0.40 0.54 1.06          |  |
|                                       |       | 0.08 0.11 0.14                                     |  | 0.11 0.15 0.19          |           | 0.24 0.31 0.40          |  | 0.31 0.41 0.52                    |  | 0.24 0.31 0.40          |           | 0.31 0.41 0.52          |  |
|                                       |       | 0.08 0.10 0.14                                     |  | 0.11 0.14 0.19          |           | 0.23 0.29 0.40          |  | 0.30 0.38 0.52                    |  | 0.23 0.29 0.40          |           | 0.30 0.38 0.52          |  |
| ≥50                                   | 25-50 | 0.09 0.12 0.24                                     |  | 0.12 0.16 0.31          |           | 0.25 0.34 0.67          |  | 0.33 0.44 0.88                    |  | 0.19 0.26 0.33          |           | 0.25 0.34 0.67          |  |
|                                       |       | 0.07 0.09 0.12                                     |  | 0.09 0.12 0.15          |           | 0.19 0.26 0.33          |  | 0.25 0.34 0.43                    |  | 0.19 0.26 0.33          |           | 0.25 0.34 0.43          |  |
|                                       |       | 0.07 0.09 0.12                                     |  | 0.09 0.11 0.15          |           | 0.19 0.24 0.33          |  | 0.25 0.31 0.43                    |  | 0.19 0.24 0.33          |           | 0.25 0.31 0.43          |  |
| ≥50                                   | 25-50 | 0.08 0.11 0.22                                     |  | 0.11 0.14 0.29          |           | 0.23 0.31 0.62          |  | 0.30 0.41 0.80                    |  | 0.18 0.24 0.30          |           | 0.23 0.31 0.62          |  |
|                                       |       | 0.06 0.08 0.11                                     |  | 0.08 0.11 0.14          |           | 0.18 0.24 0.30          |  | 0.23 0.31 0.39                    |  | 0.18 0.24 0.30          |           | 0.23 0.31 0.39          |  |
|                                       |       | 0.06 0.08 0.11                                     |  | 0.08 0.10 0.14          |           | 0.18 0.22 0.30          |  | 0.23 0.28 0.39                    |  | 0.18 0.22 0.30          |           | 0.23 0.28 0.39          |  |
|                                       |       | < 0.15 0.15-0.30 ≥ 0.30                            |  | < 0.15 0.15-0.30 ≥ 0.30 |           | < 0.15 0.15-0.30 ≥ 0.30 |  | < 0.15 0.15-0.30 ≥ 0.30           |  | < 0.15 0.15-0.30 ≥ 0.30 |           | < 0.15 0.15-0.30 ≥ 0.30 |  |
|                                       |       | Blood eosinophil count (cells ×10 <sup>9</sup> /L) |  |                         |           |                         |  |                                   |  |                         |           |                         |  |

**The prototype Oxford Asthma attack risk scale.** Numbers in each cell are predicted annual asthma attack rates for patients over the age of 12 if treatment is not changed. An asthma attack is an episode of acute asthma requiring treatment with systemic steroids ≥ 3 days and/or hospitalisation. The blood eosinophil count is contemporaneous or the highest result in last 12 months; fractional exhaled nitric oxide level (FeNO) is contemporaneous. \*Risk factors are defined by the Global Initiative for Asthma (GINA) guidelines [1]: poor symptom control (ACQ score ≥1.5), low lung function (FEV1 <80% predicted), adherence issues, reliever over-use (>200-dose salbutamol canister/month), intubation or intensive care unit admission for asthma previously, comorbidities (one of: chronic rhinosinusitis, obesity, psychiatric disease), environmental exposures (one of: smoking, allergen, pollution). Reproduced from reference [23] with permission under the original CC BY public copyright license.

814x343mm (118 x 118 DPI)

1  
2  
3 **Blood eosinophils, fractional exhaled nitric oxide, and the risk of asthma**  
4 **attacks in randomised controlled trials: protocol for a systemic review and**  
5  
6 **control arm patient-level meta-analysis for clinical prediction modelling**  
7  
8  
9

10  
11  
12 Simon Couillard, Ewout W Steyerberg, Richard Beasley, Ian D Pavord  
13  
14  
15

16  
17  
18  
19  
20  
21  
22 **Supplementary Material**  
23  
24  
25  
26  
27  
28  
29  
30  
31  
32  
33  
34  
35  
36  
37  
38  
39  
40  
41  
42  
43  
44  
45  
46  
47  
48  
49  
50  
51  
52  
53  
54  
55  
56  
57  
58  
59  
60

## Table of Contents

| Content                                                 | Page |
|---------------------------------------------------------|------|
| <b>Appendix 1</b> Medline search details                | E3   |
| <b>Appendix 2</b> Statistical analysis plan (version 1) | E5   |

For peer review only



## Appendix 1 – Medline search details

### 1.1. PubMed Search URL

<https://pubmed.ncbi.nlm.nih.gov/?term=asthma+exacerbations&filter=pubt.randomizedcontrolledtrial&filter=dates.1993%2F1%2F1-2021%2F4%2F1&filter=humani.humans&filter=lang.english&filter=lang.french&filter=age.adolescent&filter=age.alladult&filter=age.youngadult&filter=age.adult&filter=age.middleagedage&filter=age.middleaged&filter=age.aged&filter=age.80andover&sort=date>

### 1.2. PubMed Search details:

**Search:** asthma exacerbations **Filters:** Randomized Controlled Trial, Humans, English, French, Adolescent: 13-18 years, Adult: 19+ years, Young Adult: 19-24 years, Adult: 19-44 years, Middle Aged + Aged: 45+ years, Middle Aged: 45-64 years, Aged: 65+ years, 80 and over: 80+ years, from 1993/1/1 - 2021/4/1 Sort by: Most Recent

((("asthma"[MeSH Terms] OR "asthma"[All Fields] OR "asthmas"[All Fields] OR "asthma s"[All Fields]) AND ("exacerbate"[All Fields] OR "exacerbated"[All Fields] OR "exacerbates"[All Fields] OR "exacerbating"[All Fields] OR "exacerbation"[All Fields] OR "exacerbations"[All Fields] OR "exacerbator"[All Fields] OR "exacerbators"[All Fields])) AND ((randomizedcontrolledtrial[Filter]) AND (humans[Filter]) AND (1993/1/31:2021/4/1[pdat]) AND (english[Filter] OR french[Filter]) AND (adolescent[Filter] OR alladult[Filter] OR youngadult[Filter] OR adult[Filter] OR middleagedaged[Filter] OR middleaged[Filter] OR aged[Filter] OR 80andover[Filter]))

### 1.3. Translations

asthma: "asthma"[MeSH Terms] OR "asthma"[All Fields] OR "asthmas"[All Fields] OR "asthma's"[All Fields]

exacerbations: "exacerbate"[All Fields] OR "exacerbated"[All Fields] OR "exacerbates"[All Fields] OR "exacerbating"[All Fields] OR "exacerbation"[All Fields] OR "exacerbations"[All Fields] OR "exacerbator"[All Fields] OR "exacerbators"[All Fields]

1  
2  
3 **Blood eosinophils, fractional exhaled nitric oxide, and the risk of asthma**  
4 **attacks in randomised controlled trials: protocol for a systemic review and**  
5 **control arm patient-level meta-analysis for clinical prediction modelling**  
6  
7  
8  
9

10  
11  
12 **STATISTICAL ANALYSIS PLAN**  
13

14  
15 **Principal investigator**  
16

17  
18 Simon Couillard<sup>1-3</sup> MD FRCPC; [s.couillard@usherbrooke.ca](mailto:s.couillard@usherbrooke.ca)  
19  
20

21  
22 **Chief investigator**  
23

24  
25 Ian D Pavord<sup>1</sup> DM FRCP FERS FMedSci; [ian.pavord@ndm.ox.ac.uk](mailto:ian.pavord@ndm.ox.ac.uk)  
26  
27

28  
29 **Senior statistician**  
30

31  
32 Professor Ewout Steyerberg<sup>3</sup> PhD; [e.w.steyerberg@lumc.nl](mailto:e.w.steyerberg@lumc.nl)  
33  
34  
35

36 **From:** <sup>1</sup>Respiratory Medicine Unit and NIHR Oxford Respiratory BRC, Nuffield Department of  
37  
38 Medicine, University of Oxford (United-Kingdom). <sup>2</sup>Faculté de Médecine et des Sciences de la  
39  
40 Santé, Université de Sherbrooke (Canada). <sup>3</sup>Department of Biomedical Data Sciences, Leiden  
41  
42 University Medical Center, Leiden (Netherlands)  
43  
44  
45

46  
47  
48 **Address for correspondence:** Dr Simon Couillard, Respiratory Medicine Unit and Oxford  
49  
50 Respiratory NIHR BRC, Nuffield Department of Medicine, University of Oxford, Oxford OX3  
51  
52 9DU, United-Kingdom. E-mail: [S.Couillard@USherbrooke.ca](mailto:S.Couillard@USherbrooke.ca)  
53  
54  
55  
56  
57  
58

## 1. Changes from previous version of SAP

| <b>Version number<br/>Issue date</b> | <b>Author of<br/>this issue</b> | <b>Significant changes from previous version<br/>together with reasons</b> |
|--------------------------------------|---------------------------------|----------------------------------------------------------------------------|
| V0.1_2021-06-02                      | Couillard                       | Not applicable as this is the 1 <sup>st</sup> issue                        |
| V0.2_2021-06-07                      | Couillard and<br>Steyerberg     | Preliminary input by study statistician                                    |
| V0.3_2021-08-25                      | Couillard                       | Minor changes                                                              |
| V0.4_2021-09-15                      | Couillard                       | Minor changes to harmonise protocol manuscript<br>draft.                   |
| V1.0_2021-10-09                      | Couillard and<br>Steyerberg     | Adjustments to harmonise with final protocol<br>manuscript                 |
| V1.1_2022-01-23                      | Couillard                       | Adjustments following BMJ Open peer-review of<br>the protocol              |

## 2. Background and Objectives

### 2.1. Background and rationale

Assessment and reduction of the risk of attacks is a major goal of asthma management [1]. However, our ability to do this is limited because the independent risk associated with clinical risk factors has not been defined, some are difficult to identify and/or modify, and others can be modified independent of an effect on asthma attacks. These limitations mean that a precise estimation of the risk of asthma attacks and the likely benefit of treatment is not possible.

Recently, five analyses of clinical trials in asthma showed that fractional exhaled nitric oxide (FeNO) and the blood eosinophil count provide additive prognostic information on the occurrence of severe asthma attacks [2–6]. The effect is large, with a three-fold greater rate ratio for asthma attacks seen in patients with FeNO  $\geq 50$  ppb and blood eosinophils  $\geq 0.3 \times 10^9/L$  compared to those with a FeNO  $< 25$  ppb and blood eosinophils  $< 0.15 \times 10^9/L$  [7]. The excess risk of asthma attacks associated with the highest biomarker combination compared to the lowest was effectively removed by low-dose inhaled corticosteroids (ICS) in mild asthma [6], an increased dosage of ICS in moderate asthma [5,8], and biologics in severe asthma [4,9–11].

These findings suggest that the blood eosinophil count and FeNO could form the basis of a risk scale analogous to those that have had a large impact in cardiovascular medicine [12,13]. We have previously explored this hypothesis by developing a prototype scale (figure) which showed reasonable agreement between the observed and predicted asthma attack rates in the derivation trial-level data [7]. The prototype scale showed feasibility and potential to predict asthma attacks which can be prevented by treatment.

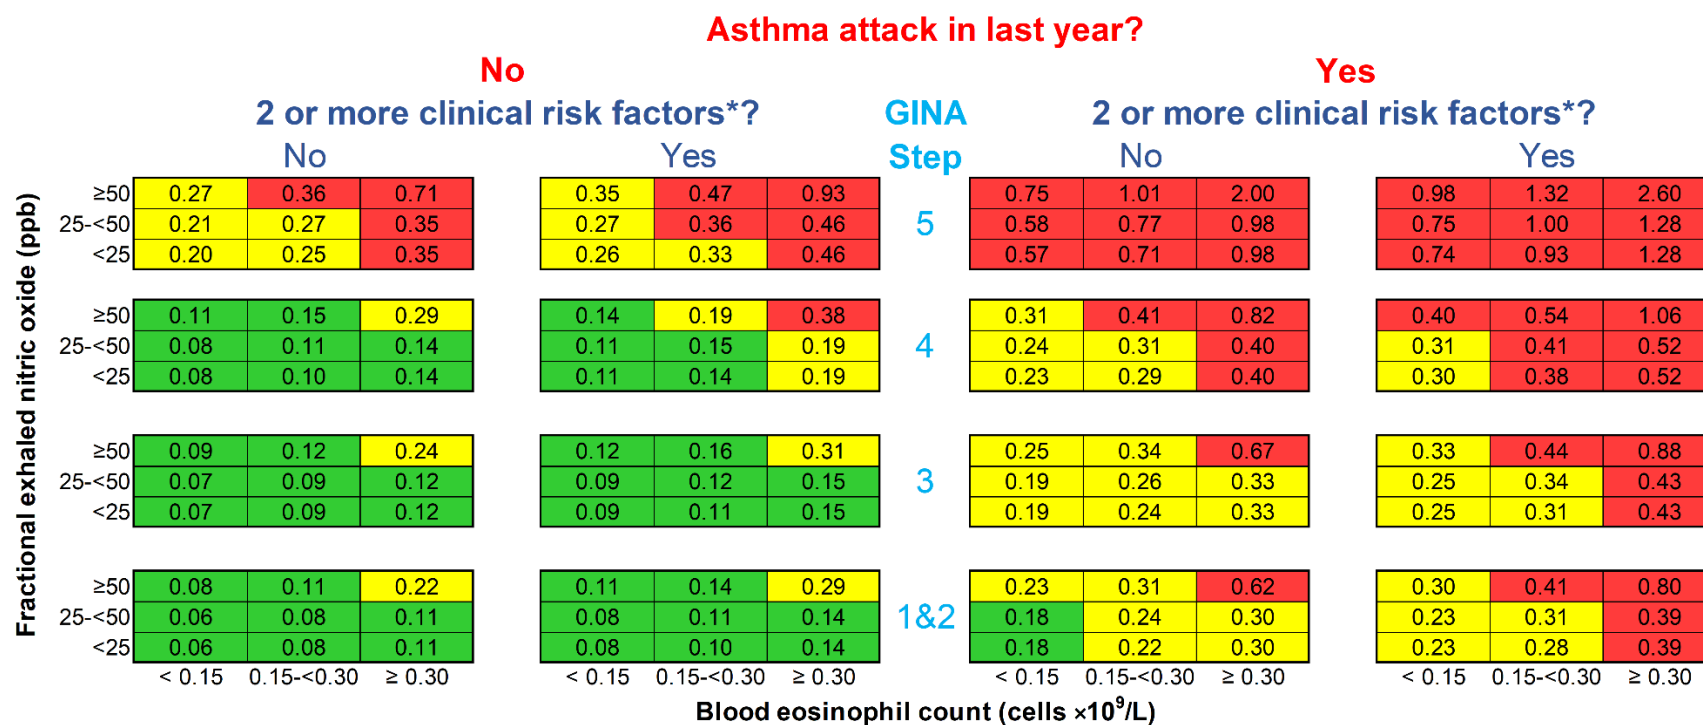

**FIGURE 1. Prototype Oxford Asthma Attack Risk ScaLE (ORACLE).**

Numbers in each cell are predicted annual asthma attack rates for patients over the age of 12 if treatment is not changed. An asthma attack is an episode of acute asthma requiring treatment with systemic steroids  $\geq 3$  days. Blood eosinophil count is contemporaneous or the highest result in last 12 months; fractional exhaled nitric oxide level is contemporaneous. \*Risk factors are defined by the Global Initiative for Asthma (GINA) guidelines [1]: poor symptom control (ACQ score  $\geq 1.5$ ), low lung function (FEV1  $< 80\%$  predicted), adherence issues, reliever over-use ( $> 200$ -dose salbutamol cannister/month), intubation or intensive care unit admission for asthma previously, comorbidities (one of: chronic rhinosinusitis, obesity, psychiatric disease), environmental exposures (one of: smoking, allergen, pollution). Reproduced from reference [7].

### 3. Objectives and Outcomes

#### 3.1.1. Hypothesis

We hypothesise that the blood eosinophil count and FeNO could form the basis of a robust and useful prediction model; we speculate that these two biomarkers are the airway equivalent of high blood pressure and serum cholesterol, insofar as they identify a pathological process which relates to the risk of adverse outcome (asthma attacks) that is modifiable by treatment (anti-inflammatory medication).

#### 3.1.2. Objective

To develop and validate a clinical prediction model for the absolute number of severe asthma attacks to occur in the following 12 months in relation to the peripheral blood eosinophil count, FeNO, and other risk factors assessed at baseline.

#### 3.1.3. Outcome to predict

The outcome to predict was the absolute number of severe asthma attacks to occur in the following 12 months (calculated as the annualised asthma attack rate). Severe asthma attacks are defined as acute asthma episodes requiring treatment with systemic steroids for 3 or more days and/or hospitalisation [14].

### 3. Study Details

This is the statistical analysis plan for the meta-analysis of individual participant data collected following a pre-specified systematic review protocol [15].

#### 3.2. Study population

We will search MEDLINE (PubMed interface) for randomised controlled trials (RCT) from 1 January 1993 to 1 April 2021 that investigated the effect of fixed treatment(s) regimen(s) on severe asthma attack rates over at least 24 weeks, also reporting a baseline value for blood eosinophils and FeNO [15].

The included RCT control arm data will be analysed to develop a risk scale to predict asthma attacks. We will focus on risk which is known to be modifiable by treatment. This modifiable excess risk relates to two surrogate measures of airway inflammation (biomarkers): the peripheral blood eosinophil count and FeNO. The contribution of other less modifiable and non-modifiable risk factors defined by the current Global Initiative for Asthma guidelines [1] will also be assessed.

#### 3.3. Study population

Following the preliminary systematic review, we identified 19 records comprising 23 independent RCTs [5,9,11,16–31].



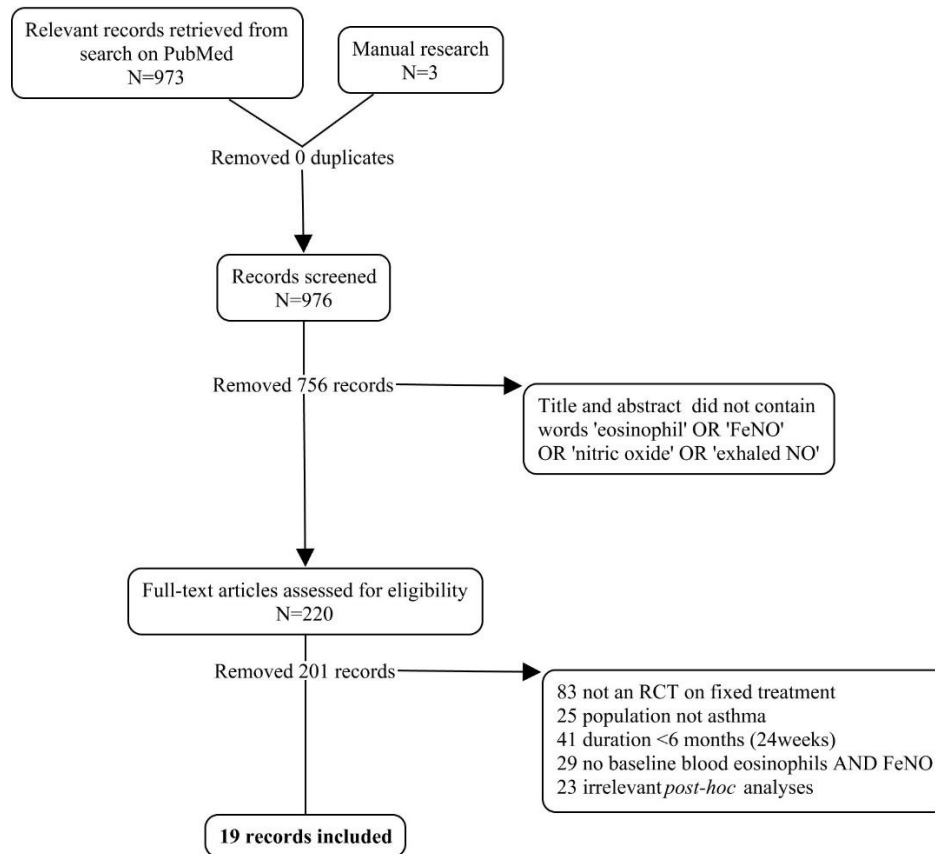

**FIGURE 2.** PRISMA flowchart of the preliminary results from the systematic review pre-specified in [13][12]

We will request data from the trial investigators and/or sponsors for patients diagnosed with asthma ages 12 and over that were randomised to the control arm (*i.e.* no ICS, lowest dose ICS, or placebo). The requested dataset will be functionally anonymised by design. The planned analysis pertains to the intention-to-treat population, modified to respect the inclusion criteria defined below.

### 3.3.1. Inclusion criteria

To be included, patients need to respect the following criteria:

- 1
- 2
- 3
- 4
- 5
- 6
- 7
- 8
- 9
- 10
- 11
- 12
- 13
- 14
- 15
- 16
- 17
- 18
- 19
- 20
- 21
- 22
- 23
- 24
- 25
- 26
- 27
- 28
- 29
- 30
- 31
- 32
- 33
- 34
- 35
- 36
- 37
- 38
- 39
- 40
- 41
- 42
- 43
- 44
- 45
- 46
- 47
- 48
- 49
- 50
- 51
- 52
- 53
- 54
- 55
- 56
- 57
- 58
- 59
- 60
- Asthma diagnosed according to the Global Initiative for Asthma (GINA) guideline-defined criteria (any severity)[1].
- 12 years of age or older
- Randomised to the control arm of the included study (*i.e.* placebo or no change in anti-inflammatory therapy).
- Data available for the following variables:
  - Peripheral blood eosinophil count ( $\times 10^9/L$ ) at baseline
  - FeNO (ppb) at baseline
  - Sufficient information on the patients' medication to determine the treatment step (*i.e.* disease severity)(see section 3.1.4, table 2)[1].
  - Number of severe asthma attacks in the 12 months previous to the baseline visit. Severe asthma attacks are defined as acute asthma requiring  $\geq 3$  days of systemic corticosteroid therapy and/or hospitalisation.
  - Duration of the controlled treatment period (days)
  - Number of severe asthma attacks observed during the study period.

### 3.3.2. Exclusion criteria

We will exclude patients if both baseline blood eosinophil count and baseline FeNO are missing.

We will also exclude patients with missing follow-up duration whilst on the allocated therapy, or missing number of severe asthma attacks during follow-up.

### 3.4. Cross-validation by study to assess external validity

The study population will be used for derivation and subsequent validation, stratifying by source RCT in cross-validation by study design, where each study serves as a validation set once [32].

### 3.5. Sources of data for complimentary external validation

The follow sources of data will be used for external validation:

- i) cross-validation by study is the initial external validation procedure that will be performed in the meta-analysis population;
- ii) observational prospective cohorts envisioned to contribute to later external validation are the Novelty cohort [33]; the outpatient general practice cohort derived from the Optimum Patient Care Research Database [34]; and any other RCTs or cohorts that do not share their data to a central repository.

## 4. Primary and secondary variables

### 4.1. General definitions

#### 4.1.1. Definition of baseline

In general, the last non-missing measurement on or prior to the date of randomisation will serve as the baseline measurement for predictors.

#### 4.1.2. Duration of the controlled treatment period

The controlled treatment period for the assessment of severe asthma attacks starts at the date of randomisation and ends at the minimum (date of last dose of placebo + appropriate wash-out period as per source RCT protocol, date of death, date of study withdrawal).

#### 4.1.3. Concomitant medication

Medications taken by the subject at any time during the controlled treatment period will be used to define the treatment step. Concomitant medications during the controlled treatment period which are recorded are defined in section 2.3 (study variables).

#### 4.1.4. Treatment step

A modified version of the 2017 and 2021 GINA guidelines definitions will be used to determine treatment step.

**TABLE 2**  
**Modified treatment step definitions for this study**

| Treatment step | Definition                                                                                                                                                                      |
|----------------|---------------------------------------------------------------------------------------------------------------------------------------------------------------------------------|
| <b>Step 1</b>  | As-needed short-acting beta2-agonist                                                                                                                                            |
| <b>Step 2</b>  | Daily low dose ICS <u>or</u><br>As-needed low dose inhaled corticosteroid (ICS)-formoterol<br>Daily leukotriene receptor agonist                                                |
| <b>Step 3</b>  | Daily low dose ICS + an additional controller therapy                                                                                                                           |
| <b>Step 4</b>  | Any medium dose ICS-containing regimen                                                                                                                                          |
| <b>Step 5</b>  | Any high dose ICS-containing regimen <u>or</u><br>Any maintenance systemic corticosteroid use (defined as use of systemic corticosteroids for $\geq 50\%$ of the previous year) |

Modified from GINA 2017 and 2021 [1] guidelines.

#### 4.1.5. Calculation of inhaled corticosteroid (ICS) dosing

ICS-dose strength will be determined using the following table, retained from the 2021 GINA guidelines:

**TABLE 3**

**Low, medium and high daily metered doses of inhaled corticosteroids in adults and adolescents (12 years and older)**

| Inhaled corticosteroid                                    | Total daily ICS dose (mcg) |           |       |
|-----------------------------------------------------------|----------------------------|-----------|-------|
|                                                           | Low                        | Medium    | High  |
| Beclomethasone dipropionate CFC-propellant MDI            | 200-500                    | >500-1000 | >1000 |
| Beclomethasone dipropionate extrafine particle MDI or DPI | 100-200                    | >200-400  | >400  |
| Budesonide                                                | 200-400                    | >400-800  | >800  |
| Fluticasone dipropionate                                  | 100-250                    | >250-500  | >500  |
| Fluticasone furoate                                       | 100                        | 100       | 200   |
| Ciclesonide                                               | 80-160                     | >160-320  | >320  |
| Mometasone furoate                                        | 200-400                    | 200-400   | >400  |

Adapted from [1]. CFC, chlorofluorocarbon; DPI, dry powder inhaler; MDI, multidose inhaler.

The following ICS dose equivalence table will be used to characterise patients' concomitant ICS use:

**TABLE 4**  
**Equivalent doses between inhaled corticosteroids**

| Inhaled corticosteroid type                    | Equivalent dose |
|------------------------------------------------|-----------------|
| Beclomethasone dipropionate CFC-propellant MDI | 1 mcg           |
| Beclomethasone dipropionate HFA or DPI         | 2.5 mcg         |
| Budesonide                                     | 1.25 mcg        |
| Fluticasone dipropionate                       | 2.5 mcg         |
| Fluticasone furoate                            | 5 mcg           |
| Ciclesonide                                    | 3.125 mcg       |
| Mometasone furoate                             | 2.27 mcg        |
| Triamcinolone acetonide                        | 0.5 mcg         |

Adapted from [1][1].

#### 4.2. Primary variable and study endpoint

The effect to measure and predict is number of severe asthma attacks (defined as acute asthma requiring  $\geq 3$  days of systemic corticosteroids and/or hospitalisation)[14] to occur in the following 12 months in relation to the peripheral blood eosinophil count, FeNO, and other prognostic actors assessed at baseline.

The start of an exacerbation is defined as the start date of systemic corticosteroids, emergency room (ER), urgent care (UC) visits, or hospital admissions due to asthma, whichever occurs earlier.

The end date is defined as the last day of systemic corticosteroids or ER/UC/hospital discharge, whichever occurs later.

Two or more exacerbations with the same start date and end date will be counted as one exacerbation for the purposes of calculating the number and duration of exacerbations for a subject.

In the case that one or more exacerbations are recorded as starting or ending during another exacerbation, these will be counted as one exacerbation, using the earliest exacerbation start date and the latest exacerbation stop date to calculate duration.

1  
2  
3 Additional systemic corticosteroid treatments, ER visit or UC visit requiring use of systemic  
4 corticosteroids, or hospital admission will not be regarded as a new exacerbation. To be counted  
5 as a new exacerbation it must be preceded by at least 7 days in which neither criterion is fulfilled.  
6  
7 If the end date of the first exacerbation and the start date of the second exacerbation are less than  
8  
9 7 days apart, then these will be counted as one exacerbation.  
10  
11  
12  
13  
14

15 The number of days the subject experiences a protocol defined exacerbation, including the  
16 subsequent 7 days (when a further exacerbation would not be considered as a second exacerbation),  
17 will be subtracted from the time at risk defined above for the primary analysis. For example, if a  
18 subject has a single exacerbation which lasts 4 days then  $7 + 4 = 11$  days will be subtracted from  
19 the time at risk.  
20  
21  
22  
23  
24  
25  
26  
27

#### 28 **4.3. Subgrouping for biomarker-stratified clinical prediction modelling**

##### 29 **3.1.1. Biomarker-stratified subgroups**

30  
31  
32 The main multivariable prognostic modelling analysis will use continuous values of the blood  
33 eosinophil count, FeNO, and other clinical risk factors (table 1). If relevant, combined effects will  
34 be summarised in a 3×3 matrix stratified by the blood eosinophil count (<0.15, 0.15-<0.30,  
35  $\geq 0.30 \times 10^9$  cells/L) and FeNO (<25, 25-<50,  $\geq 50$  ppb), and plotted in interaction plots with 95%  
36 confidence intervals (CI). Heterogeneity in estimates between studies will be quantified by  $I^2$   
37 statistics. Additional analyses will consider continuous versions of predictors with restricted cubic  
38 splines [35].  
39  
40  
41  
42  
43  
44  
45  
46  
47  
48  
49  
50  
51  
52  
53  
54  
55  
56  
57  
58  
59  
60

### 3.1.2. Comparative subgroup rate ratio analysis

If relevant following analyses on continuous data, crude and adjusted rate ratios of the annualised severe exacerbation rate for each of the 9 categories (3×3 matrix according to the blood eosinophil count (<0.15, 0.15-<0.30, ≥0.30×10<sup>9</sup> cells/L) and FeNO (<25, 25-<50, ≥50 ppb) will be determined. Rate ratios for each subgroup are calculated as the weighted annualised exacerbation rate for the selected subgroup divided by the mean for the remainder of the matrix, weighted by patient-years of data. The adjusted rate ratios will account for asthma severity (treatment step), history of asthma attacks (≤1 or >1 in previous 12 months); as well as age, sex, and source RCT to control for unsuspected confounding factors relating to the three latter variables.

The potentially relevant clinical risk factors for asthma attacks listed in section 3.4 will be assessed using a bootstrapped backward stepwise selection procedure during regression analysis in a random effects model. Key predictors are: blood eosinophils, FeNO, treatment step and the past history of exacerbations (0 or ≥1 in previous 12 months).

#### **4.4. Potential clinical predictors**

The following variables will be assessed as potential clinical predictors, in addition to the forced variables (treatment step, past history of exacerbations (<1 or ≥1 in previous 12 months), age, sex, and source RCT).

- Ethnicity: categorical
- Comorbidities: categorical (list of comorbidities following the Charlson comorbidity index [35][34])
- Socioeconomic status (anonymised and operationalised depending dataset)



- 1
- 2
- 3 • Body mass index: continuous
- 4
- 5
- 6 • Postbronchodilator (BD) FEV1, as % predicted (or preBD if no postBD): continuous
- 7
- 8 • % change in FEV1 post-bronchodilator (calculated as (FEV1 post BD minus FEV1 preBD
- 9 in litres) divided by FEV1 preBD in litres: continuous
- 10
- 11
- 12 • FEV1/FVC ratio, calculated as FEV1 postBD in litres divided by FVC postBD in litres (or
- 13 using preBD values if no postBD)
- 14
- 15
- 16
- 17 • Smoking status (current, ex-, passive, never-smokers): categorical
- 18
- 19
- 20 • Airborne allergies reported (yes/no): categorical
- 21
- 22 • Allergy testing positive (yes/no): categorical
- 23
- 24 • Chronic rhinosinusitis (yes/no): categorical
- 25
- 26
- 27 • Nasal polyposis (yes/no): categorical
- 28
- 29 • Adherent to medications (operationalised definition depending on the dataset): continuous
- 30 (or categorical if not feasible to operationalise in a continuous variable)
- 31
- 32
- 33
- 34 • Inhalers prescribed:
- 35
  - 36 - ICS: categorical (yes/no)
  - 37
  - 38 - ICS daily equivalent dose (continuous)
  - 39
  - 40
  - 41 - Short-acting beta2-agonist (yes/no) and number of actuations used per month
  - 42 (continuous)
  - 43
  - 44
  - 45 - Long-acting beta2-agonist (yes/no)
  - 46
  - 47 - Long-acting muscarinic antagonist (yes/no)
  - 48
  - 49
  - 50 - Leukotriene receptor antagonist (yes/no)
  - 51
  - 52 - Theophylline or aminophylline (yes/no)
  - 53
  - 54
- 55 • On maintenance oral corticosteroids (OCS) (yes/no): categorical
- 56
- 57
- 58
- 59
- 60

- Severe exacerbation in the preceding 12 months (defined as an acute event requiring  $\geq 3$  days of systemic corticosteroids and/or hospitalisation): yes/no category and continuously by number of episodes in preceding 12 months.
- Previous intensive care or intubation for airways disease (yes/no): categorical
- Asthma control questionnaire (ACQ) score (or asthma control test (ACT) or any other standardised symptom score test if ACQ not available): continuous (ACQ or ACT) and categorical (according to established cut points for uncontrolled disease:  $ACQ \geq 1.5$  or  $ACT < 20$ )

#### 4.5. Missing values

Missing values will be assessed for their mechanism (missing completely at random, missing at random or missing not at random) by the main investigators in conjunction with the study statistician. When data is missing at random, 10 complete datasets will be generated by multiple imputation.

#### 4.6. Heterogeneity assessment

The variability between studies will be quantified in a random effect analysis and quantified with  $I^2$  statistics.

#### 4.7. Optimism correction

The adjusted biomarker-stratified and clinical predictors' incidence rate ratios will be corrected for overoptimistic predictions. Penalty terms will be used and/or linear shrinkage factors, as estimated from cross-validation and/or bootstrap resampling procedures as implemented in `rms` and `glmnet` libraries for R.

#### 4.8. Statistical software and confidence intervals

Data analysis will be conducted in collaboration with the study statistician (ES) using R software. Estimates will be accompanied by two-sided 95% CI.

#### 4. Clinical prediction model presentation formats

A summary prognostic equation will be produced, assessed by the principal investigators, and adapted to previously reported GINA treatment step reference attack rates [37] to allow for a user-friendly prediction summary chart similar to the reported prototype (figure 1).

#### 5. Performance evaluation

##### 5.1. General performance measures

The resultant prognostic equation and chart will be assessed in the validation cohorts defined in section 2.4. Discrimination will be evaluated. Calibration plots will be created with focus on centiles of risk (10<sup>th</sup>, 50<sup>th</sup> and 90<sup>th</sup> of the distribution of predicted attack rates), and summary measures of the plot will be computed. Sensitivity, specificity and receiving operating characteristic (ROC) analyses of the model will be assessed. Reliability will be evaluated using the intraclass correlation coefficient (two-ways mixed model for absolute agreement, single measures, with 95% CI). Calibration will be assessed graphically, with characterization of calibration in the large by a calibration intercept, and overall prognostic strength by the calibration slope. Discrimination will be assessed by the c-statistic, and clinical utility by Net Benefit plotted in decision curves.

## 5.2. Subgroup performance measures

The performance of the resultant chart will be evaluated across the selected clinical predictors (composite biomarker category; treatment step; asthma attack history; retained clinical risk factors) as stated in section 4.1 for each subsection of the chart in each of the validation cohorts. In effect, assuming the final chart resembles the prototype (figure 1), this will result in performance assessment for each of the 16 subsections and/or each of the 144 squares, depending on the validation cohort size.

## 6. Study power

Considering a mean annualised severe asthma attack of 0.6 in the entire study population and a conservative estimate that the derivation cohort will comprise 50% of the individual patient data reported in our prototype scale ( $0.5 \times 3051 = 1525$ ) [7], there should be approximately 915 events to derive a clinical prediction model. With a target maximum of 10 prediction variables, the event per variable (EPV) number is 92; well over the recommended 10-20 EPV [38]. However, we concede that the EPV will be considerably lower for mild asthma populations, where trials identified less than 100 severe asthma attack events in their control arms [17,31]. Conversely, the study will be more than adequately powered for moderate-to-severe asthma.

## Strengths and limitations of our approach

### 6.1. Strengths

- The study design and its objective – to derive and validate a clinical prediction tool based on biomarkers of type-2 inflammation – fulfils an unmet clinical need. We speculate that a risk stratification strategy centred on modifiable type-2 airway inflammation rather than

1  
2  
3 difficult-to-modify clinical characteristics would facilitate better treatment decisions by  
4 providing a framework for a preventive, treatable trait-based management.  
5  
6

- 7
- 8 • A proof-of-concept evaluation of this project has already been completed and shows  
9 feasibility and potential to predict asthma attacks which can be prevented by treatment  
10 [7,10] (Figure 1).  
11  
12
  - 13 • Study selection bias is reduced via the pre-specified systematic review approach.  
14  
15
  - 16 • Adequate study power. As stated above, with an estimated overall attack rate equal to that  
17 reported in the prototype scale (0.6 attacks per year) and a conservative estimate of  
18 individual participant data provided (50% of the prototype study population), there should  
19 ample events observed for model derivation validation.  
20  
21
  - 22 • Detection bias of the outcome of interest (severe asthma attacks) is minimised by its  
23 rigorous monitoring and documentation in the context of RCTs.  
24  
25
  - 26 • In addition to the cross-validation by study [32], we plan to validate the resultant chart in  
27 different validation cohorts: a part of the base RCT population, Novelty [33] and the  
28 Optimum Patient Care Research Database [34].  
29  
30  
31  
32  
33  
34  
35  
36  
37  
38  
39  
40  
41  
42  
43  
44  
45  
46  
47  
48  
49  
50  
51  
52  
53  
54  
55  
56  
57  
58  
59  
60

## 6.2. Limitations

- Many of the included RCT study populations were positively selected to be at high risk of asthma attacks, and trials enrolling mild asthmatics have reported low asthma attack rates ; this may result in the model overestimating the risk of events and underperforming in mild asthma.
- The assumption at the basis of our approach is that the type-2 biomarkers blood eosinophils and FeNO carry additive and independent predictive value for the risk of asthma attacks at all disease severities. It is unclear if FeNO exerts a similar predictive value in mild asthma [6][6]. This modification of risk will be addressed by statistical interaction terms.
- There is no clear reference for treatment step asthma attack rates adapted for the most recent GINA 2021 guidelines; it is possible we will need to model around the previously reported GINA 2017 classification reference asthma attack rates [37].
- We suspect that some of the important clinical risk factors emphasised by current management guidelines [1] will not be present in the RCT population (*e.g.* nonadherence is usually an exclusion criteria; salbutamol over-use is not always reported).
- Controlled trial populations in asthma are notorious for a strong placebo effect and do not necessarily reflect clinical practice, where treatment fluctuates according to the perceived or observed risk of asthma attacks; this may impact external validation in observational cohorts.

**REFERENCES**

- 1 Global Initiative for Asthma (GINA). Global Strategy for Asthma Management and Prevention (2021 update). 2021. <https://ginasthma.org/>
- 2 Busse WW, Wenzel SE, Casale TB, *et al.* Baseline FeNO as a Prognostic Biomarker for Subsequent Severe Asthma Exacerbations in Patients With Uncontrolled, Moderate-to-Severe Asthma Receiving Placebo in the LIBERTY ASTHMA QUEST Study: A Post Hoc Analysis. *The Lancet Respiratory Medicine* 2021;**0**. doi:10.1016/S2213-2600(21)00124-7
- 3 Kraft M, Brusselle G, Mark FitzGerald J, *et al.* Patient characteristics, biomarkers, and exacerbation risk in severe, uncontrolled asthma. *European Respiratory Journal* 2021;**59**. doi:10.1183/13993003.00413-2021
- 4 Shrimanker R, Keene O, Hynes G, *et al.* Prognostic and predictive value of blood eosinophil count, fractional exhaled nitric oxide, and their combination in severe asthma: A post hoc analysis. *American Journal of Respiratory and Critical Care Medicine* 2019;**200**:1308–12. doi:10.1164/rccm.201903-0599LE
- 5 Lee LA, Bailes Z, Barnes N, *et al.* Efficacy and safety of once-daily single-inhaler triple therapy (FF/UMEC/VI) versus FF/VI in patients with inadequately controlled asthma (CAPTAIN): a double-blind, randomised, phase 3A trial. *The Lancet Respiratory Medicine* 2021;**9**:69–84. doi:10.1016/S2213-2600(20)30389-1
- 6 Pavord ID, Holliday M, Reddel HK, *et al.* Predictive value of blood eosinophils and exhaled nitric oxide in adults with mild asthma: a prespecified subgroup analysis of an open-label,

- 1  
2  
3 parallel-group, randomised controlled trial. *The Lancet Respiratory Medicine* 2020;**8**:671–  
4  
5 80. doi:10.1016/S2213-2600(20)30053-9  
6  
7  
8  
9 7 Couillard S, Laugerud A, Jabeen M, *et al.* Derivation of a prototype asthma attack risk scale  
10 centred on blood eosinophils and exhaled nitric oxide. *Thorax* 2022;**77**:199–202.  
11  
12 doi:10.1136/thoraxjnl-2021-217325  
13  
14  
15  
16  
17 8 Couillard S, Pavord I. Fluticasone furoate: CAPTAIN of fluticasones in type-2  
18 inflammatory asthma. *Respirology* 2022;**27**. doi:10.1111/resp.14213  
19  
20  
21  
22  
23 9 Menzies-Gow A, Corren J, Bourdin A, *et al.* Tezepelumab in Adults and Adolescents with  
24 Severe, Uncontrolled Asthma. *New England Journal of Medicine* 2021;**384**:1800–9.  
25  
26 doi:10.1056/NEJMoa2034975  
27  
28  
29  
30 10 Couillard S, Do W, Beasley R, *et al.* Predicting the benefits of type-2 targeted anti-  
31 inflammatory treatment with the prototype OxfoRd Asthma attaCk risk scaLE (ORACLE).  
32  
33 *ERJ Open Research* Published Online First: 2022. doi:10.1183/23120541.00570-2021  
34  
35  
36  
37  
38 11 Pavord ID, Korn S, Howarth P, *et al.* Mepolizumab for severe eosinophilic asthma  
39 (DREAM): A multicentre, double-blind, placebo-controlled trial. *The Lancet*  
40  
41 2012;**380**:651–9. doi:10.1016/S0140-6736(12)60988-X  
42  
43  
44  
45  
46 12 Conroy RM, Pyörälä K, Fitzgerald AP, *et al.* Estimation of ten-year risk of fatal  
47 cardiovascular disease in Europe: The SCORE project. *European Heart Journal*  
48  
49 2003;**24**:987–1003. doi:10.1016/S0195-668X(03)00114-3  
50  
51  
52  
53  
54  
55  
56  
57  
58  
59  
60



- 1  
2  
3 13 Jackson R, Barham P, Bills J, *et al.* Management of raised blood pressure in New Zealand:  
4 A discussion document. *British Medical Journal*. 1993;**307**:107–10.  
5  
6 doi:10.1136/bmj.307.6896.107  
7  
8  
9  
10  
11 14 Reddel HK, Taylor DR, Bateman ED, *et al.* An official American Thoracic  
12 Society/European Respiratory Society statement: Asthma control and exacerbations -  
13 Standardizing endpoints for clinical asthma trials and clinical practice. *American Journal*  
14 *of Respiratory and Critical Care Medicine* 2009;**180**:59–99. doi:10.1164/rccm.200801-  
15 060ST  
16  
17  
18  
19  
20  
21  
22  
23 15 Couillard S, Pavord I. Exhaled nitric oxide, blood eosinophils and the risk of asthma attacks  
24 in randomised clinical trials: a systemic review and meta-analysis of individual participant  
25 data. 2021.  
26  
27  
28  
29  
30  
31 16 Brightling CE, Gaga M, Inoue H, *et al.* Effectiveness of fevipiprant in reducing  
32 exacerbations in patients with severe asthma (LUSTER-1 and LUSTER-2): two phase 3  
33 randomised controlled trials. *The Lancet Respiratory Medicine* 2021;**9**:43–56.  
34  
35  
36  
37  
38  
39  
40  
41  
42 17 Beasley R, Holliday M, Reddel HK, *et al.* Controlled trial of budesonide-formoterol as  
43 needed for mild asthma. *New England Journal of Medicine* 2019;**380**:2020–30.  
44  
45  
46  
47  
48  
49  
50 18 Panettieri RA, Sjöbring U, Péterffy AM, *et al.* Tralokinumab for severe, uncontrolled  
51 asthma (STRATOS 1 and STRATOS 2): two randomised, double-blind, placebo-controlled,  
52  
53  
54  
55  
56  
57  
58  
59  
60

- 1  
2  
3 phase 3 clinical trials. *The Lancet Respiratory Medicine* 2018;**6**:511–25.  
4  
5 doi:10.1016/S2213-2600(18)30184-X  
6  
7  
8  
9 19 Castro M, Corren J, Pavord ID, *et al.* Dupilumab Efficacy and Safety in Moderate-to-Severe  
10 Uncontrolled Asthma. *New England Journal of Medicine* 2018;**378**:2486–96.  
11  
12 doi:10.1056/NEJMoa1804092  
13  
14  
15  
16  
17 20 Corren J, Parnes JR, Wang L, *et al.* Tezepelumab in Adults with Uncontrolled Asthma. *New*  
18  
19 *England Journal of Medicine* 2017;**377**:936–46. doi:10.1056/NEJMoa1704064  
20  
21  
22  
23 21 Wenzel S, Castro M, Corren J, *et al.* Dupilumab efficacy and safety in adults with  
24 uncontrolled persistent asthma despite use of medium-to-high-dose inhaled corticosteroids  
25 plus a long-acting  $\beta$ 2 agonist: a randomised double-blind placebo-controlled pivotal phase  
26  
27 2b dose-ranging trial. *The Lancet* 2016;**388**:31–44. doi:10.1016/S0140-6736(16)30307-5  
28  
29  
30  
31  
32  
33 22 Park HS, Kim MK, Imai N, *et al.* A phase 2a study of benralizumab for patients with  
34 eosinophilic asthma in South Korea and Japan. *International Archives of Allergy and*  
35  
36 *Immunology* 2016;**169**:135–45. doi:10.1159/000444799  
37  
38  
39  
40  
41 23 Harris JM, Maciucă R, Bradley MS, *et al.* A randomized trial of the efficacy and safety of  
42 quilizumab in adults with inadequately controlled allergic asthma. *Respiratory Research*  
43  
44 2016;**17**:1–11. doi:10.1186/s12931-016-0347-2  
45  
46  
47  
48  
49 24 Hanania NA, Korenblat P, Chapman KR, *et al.* Efficacy and safety of lebrikizumab in  
50 patients with uncontrolled asthma (LAVOLTA I and LAVOLTA II): replicate, phase 3,  
51 randomised, double-blind, placebo-controlled trials. *The Lancet Respiratory Medicine*  
52  
53 2016;**4**:781–96. doi:10.1016/S2213-2600(16)30265-X  
54  
55  
56  
57  
58  
59  
60

- 1  
2  
3 25 Castro M, Wenzel SE, Bleecker ER, *et al.* Benralizumab, an anti-interleukin 5 receptor  $\alpha$   
4 monoclonal antibody, versus placebo for uncontrolled eosinophilic asthma: A phase 2b  
5 randomised dose-ranging study. *The Lancet Respiratory Medicine* 2014;**2**:879–90.  
6  
7 doi:10.1016/S2213-2600(14)70201-2  
8  
9  
10  
11  
12  
13 26 Hanania NA, Wenzel S, Roseñ K, *et al.* Exploring the effects of omalizumab in allergic  
14 asthma: An analysis of biomarkers in the EXTRA study. *American Journal of Respiratory*  
15 *and Critical Care Medicine* 2013;**187**:804–11. doi:10.1164/rccm.201208-1414OC  
16  
17  
18  
19  
20  
21 27 Brusselle GG, VanderStichele C, Jordens P, *et al.* Azithromycin for prevention of  
22 exacerbations in severe asthma (AZISAST): A multicentre randomised double-blind  
23 placebo-controlled trial. *Thorax* 2013;**68**:322–9. doi:10.1136/thoraxjnl-2012-202698  
24  
25  
26  
27  
28  
29 28 Hanania NA, Noonan M, Corren J, *et al.* Lebrikizumab in moderate-to-severe asthma:  
30 Pooled data from two randomised placebo-controlled studies. *Thorax* 2015;**70**:748–56.  
31  
32 doi:10.1136/thoraxjnl-2014-206719  
33  
34  
35  
36  
37 29 Sorkness CA, Lemanske RF, Mauger DT, *et al.* Long-term comparison of 3 controller  
38 regimens for mild-moderate persistent childhood asthma: The Pediatric Asthma Controller  
39 Trial. *Journal of Allergy and Clinical Immunology* 2007;**119**:64–72.  
40  
41  
42  
43  
44  
45  
46  
47 30 Corren J, Lemanske RF, Hanania NA, *et al.* Lebrikizumab treatment in adults with asthma.  
48  
49 *New England Journal of Medicine* 2011;**365**:1088–98. doi:10.1056/NEJMoa1106469  
50  
51  
52  
53 31 Hardy J, Baggott C, Fingleton J, *et al.* Budesonide-formoterol reliever therapy versus  
54  
55 maintenance budesonide plus terbutaline reliever therapy in adults with mild to moderate  
56  
57  
58  
59  
60

- 1  
2  
3 asthma (PRACTICAL): a 52-week, open-label, multicentre, superiority, randomised  
4 controlled trial. *Lancet (London, England)* 2019;**394**:919–28. doi:10.1016/S0140-  
5  
6 6736(19)31948-8  
7  
8  
9  
10  
11 32 Steyerberg EW, Harrell FE. Prediction models need appropriate internal, internal-external,  
12 and external validation. *Journal of Clinical Epidemiology*. 2016;**69**:245–7.  
13 doi:10.1016/j.jclinepi.2015.04.005  
14  
15  
16  
17  
18  
19 33 Reddel HK, Gerhardsson de Verdier M, Agustí A, *et al*. Prospective observational study in  
20 patients with obstructive lung disease: NOVELTY design. *ERJ Open Research*  
21 2019;**5**:00036–2018. doi:10.1183/23120541.00036-2018  
22  
23  
24  
25  
26  
27 34 Price DB, Bosnic-Anticevich S, Pavord ID, *et al*. Association of elevated fractional exhaled  
28 nitric oxide concentration and blood eosinophil count with severe asthma exacerbations.  
29 *Clinical and Translational Allergy* 2019;**9**:41. doi:10.1186/s13601-019-0282-7  
30  
31  
32  
33  
34  
35 35 Harrell FE. *Regression Modeling Strategies With Applications to Linear Models, Logistic*  
36 *and Ordinal Regression, and Survival Analysis*. Springer International Publishing 2015.  
37 doi:10.1007/978-3-319-19425-7  
38  
39  
40  
41  
42  
43 36 Quan H, Li B, Couris CM, *et al*. Updating and validating the charlson comorbidity index  
44 and score for risk adjustment in hospital discharge abstracts using data from 6 countries.  
45 *American Journal of Epidemiology* 2011;**173**:676–82. doi:10.1093/aje/kwq433  
46  
47  
48  
49  
50  
51 37 Suruki RY, Daugherty JB, Boudiaf N, *et al*. The frequency of asthma exacerbations and  
52 healthcare utilization in patients with asthma from the UK and USA. *BMC Pulmonary*  
53 *Medicine* 2017;**17**. doi:10.1186/s12890-017-0409-3  
54  
55  
56  
57  
58  
59  
60

1  
2  
3  
4  
5  
6  
7  
8  
9  
10  
11  
12  
13  
14  
15  
16  
17  
18  
19  
20  
21  
22  
23  
24  
25  
26  
27  
28  
29  
30  
31  
32  
33  
34  
35  
36  
37  
38  
39  
40  
41  
42  
43  
44  
45  
46  
47  
48  
49  
50  
51  
52  
53  
54  
55  
56  
57  
58  
59  
60

38 Steyerberg EW. *Clinical Prediction Models*. Cham: : Springer International Publishing  
2019. doi:10.1007/978-3-030-16399-0

For peer review only

**PRISMA-P (Preferred Reporting Items for Systematic review and Meta-Analysis Protocols) 2015 checklist: recommended items to address in a systematic review protocol\***

| Section and topic                 | Item No | Checklist item                                                                                                                                                                                                                | Manuscript page (of 29 page Word document) |
|-----------------------------------|---------|-------------------------------------------------------------------------------------------------------------------------------------------------------------------------------------------------------------------------------|--------------------------------------------|
| <b>ADMINISTRATIVE INFORMATION</b> |         |                                                                                                                                                                                                                               |                                            |
| Title:                            |         |                                                                                                                                                                                                                               |                                            |
| Identification                    | 1a      | Identify the report as a protocol of a systematic review                                                                                                                                                                      | p.1                                        |
| Update                            | 1b      | If the protocol is for an update of a previous systematic review, identify as such                                                                                                                                            | p.1                                        |
| Registration                      | 2       | If registered, provide the name of the registry (such as PROSPERO) and registration number                                                                                                                                    | p.1 + <b>p.5</b>                           |
| Authors:                          |         |                                                                                                                                                                                                                               |                                            |
| Contact                           | 3a      | Provide name, institutional affiliation, e-mail address of all protocol authors; provide physical mailing address of corresponding author                                                                                     | p.1                                        |
| Contributions                     | 3b      | Describe contributions of protocol authors and identify the guarantor of the review                                                                                                                                           | p.2                                        |
| Amendments                        | 4       | If the protocol represents an amendment of a previously completed or published protocol, identify as such and list changes; otherwise, state plan for documenting important protocol amendments                               | N/A                                        |
| Support:                          |         |                                                                                                                                                                                                                               |                                            |
| Sources                           | 5a      | Indicate sources of financial or other support for the review                                                                                                                                                                 | p.2                                        |
| Sponsor                           | 5b      | Provide name for the review funder and/or sponsor                                                                                                                                                                             | p.2                                        |
| Role of sponsor or funder         | 5c      | Describe roles of funder(s), sponsor(s), and/or institution(s), if any, in developing the protocol                                                                                                                            | p.2                                        |
| <b>INTRODUCTION</b>               |         |                                                                                                                                                                                                                               |                                            |
| Rationale                         | 6       | Describe the rationale for the review in the context of what is already known                                                                                                                                                 | p.7                                        |
| Objectives                        | 7       | Provide an explicit statement of the question(s) the review will address with reference to participants, interventions, comparators, and outcomes (PICO)                                                                      | p.8                                        |
| <b>METHODS</b>                    |         |                                                                                                                                                                                                                               |                                            |
| Eligibility criteria              | 8       | Specify the study characteristics (such as PICO, study design, setting, time frame) and report characteristics (such as years considered, language, publication status) to be used as criteria for eligibility for the review | p.10-12                                    |
| Information sources               | 9       | Describe all intended information sources (such as electronic databases, contact with study authors, trial registers or other grey literature sources) with planned dates of coverage                                         | p.11-12                                    |
| Search strategy                   | 10      | Present draft of search strategy to be used for at least one electronic database, including planned limits, such that it could be repeated                                                                                    | p.11-12 + Appendix 1                       |

1  
2  
3  
4  
5  
6  
7  
8  
9  
10  
11  
12  
13  
14  
15  
16  
17  
18  
19  
20  
21  
22  
23  
24  
25  
26  
27  
28  
29  
30  
31  
32  
33  
34  
35  
36  
37  
38  
39  
40  
41  
42  
43  
44  
45  
46

|                                    |     |                                                                                                                                                                                                                                                     |                      |
|------------------------------------|-----|-----------------------------------------------------------------------------------------------------------------------------------------------------------------------------------------------------------------------------------------------------|----------------------|
| Study records:                     |     |                                                                                                                                                                                                                                                     |                      |
| Data management                    | 11a | Describe the mechanism(s) that will be used to manage records and data throughout the review                                                                                                                                                        | p.11-12              |
| Selection process                  | 11b | State the process that will be used for selecting studies (such as two independent reviewers) through each phase of the review (that is, screening, eligibility and inclusion in meta-analysis)                                                     | p.11-12              |
| Data collection process            | 11c | Describe planned method of extracting data from reports (such as piloting forms, done independently, in duplicate), any processes for obtaining and confirming data from investigators                                                              | p.12                 |
| Data items                         | 12  | List and define all variables for which data will be sought (such as PICO items, funding sources), any pre-planned data assumptions and simplifications                                                                                             | p.12                 |
| Outcomes and prioritization        | 13  | List and define all outcomes for which data will be sought, including prioritization of main and additional outcomes, with rationale                                                                                                                | p.11 + p.12          |
| Risk of bias in individual studies | 14  | Describe anticipated methods for assessing risk of bias of individual studies, including whether this will be done at the outcome or study level, or both; state how this information will be used in data synthesis                                | p.13                 |
| Data synthesis                     | 15a | Describe criteria under which study data will be quantitatively synthesised                                                                                                                                                                         | p.13-15 + Appendix 2 |
|                                    | 15b | If data are appropriate for quantitative synthesis, describe planned summary measures, methods of handling data and methods of combining data from studies, including any planned exploration of consistency (such as I <sup>2</sup> , Kendall's τ) | p.13-15 + Appendix 2 |
|                                    | 15c | Describe any proposed additional analyses (such as sensitivity or subgroup analyses, meta-regression)                                                                                                                                               | p.13-15 + Appendix 2 |
|                                    | 15d | If quantitative synthesis is not appropriate, describe the type of summary planned                                                                                                                                                                  | N/A                  |
| Meta-bias(es)                      | 16  | Specify any planned assessment of meta-bias(es) (such as publication bias across studies, selective reporting within studies)                                                                                                                       | N/A                  |
| Confidence in cumulative evidence  | 17  | Describe how the strength of the body of evidence will be assessed (such as GRADE)                                                                                                                                                                  | N/A                  |

**\* It is strongly recommended that this checklist be read in conjunction with the PRISMA-P Explanation and Elaboration (cite when available) for important clarification on the items. Amendments to a review protocol should be tracked and dated. The copyright for PRISMA-P (including checklist) is held by the PRISMA-P Group and is distributed under a Creative Commons Attribution Licence 4.0.**

*From: Shamseer L, Moher D, Clarke M, Ghersi D, Liberati A, Petticrew M, Shekelle P, Stewart L, PRISMA-P Group. Preferred reporting items for systematic review and meta-analysis protocols (PRISMA-P) 2015: elaboration and explanation. BMJ. 2015 Jan 2;349(jan02 1):g7647.*
